# Supplementary material for: Maternal Plasma Cell-Free RNA as a Predictor of Early and Late-Onset Preeclampsia Throughout Pregnancy
Source: Research Square preprint supplement (doi:10.21203/rs.3.rs-5684050/v1), 2025-01-16
Supplement: Supplementary file 1 [file 1ed3c1f4664f2383e92dcbc9.xlsx]

## Sheet: Supplementary Table 5
Table S5. cfRNAs composing the predictive models for early-onset preeclampsia and late-onset preeclampsia at the first and second trimester of pregnancy.
EOPE prediction in the first trimester of pregnancy
ATP5F1E	DDX39B	LINC01476	RPRM
C11orf97	E2F6P2	MDK	RPS27P21
C9orf40	ENSG00000248867	MMP7	SELENOM
CBR3	ENSG00000254888	MRPL38	TNFRSF12A
CCL4L2	ENSG00000255470	MYL6	TP53TG1
CCNY-AS1	IGHV1-67	PAEP	TPM1
CD74	IGHV3-64D	PPP1R15A	TRIB1
CDKN2D	KRTAP9-3	RAB6D	TSKU
CFHR1	KRTAP9-8	RFLNB	USF2
LOPE prediction in the first trimester of pregnancy
LINC01772	RPL35AP17	ENSG00000232383	SNORD126
CD52	MRNIP-DT	PRR23D1	TRDV3
HSD3BP3	ENSG00000229721	ENSG00000285958	ENSG00000266356
FABP7P1	ENSG00000287616	A2M-AS1	ENSG00000265217
LINC00608	ENSG00000216809	ENSG00000288598
EOPE prediction in the second trimester of pregnancy
ALOX5AP	GPX3	MRPS18CP7	RNF148
ATP5F1B	IGF1	MT-ND1	SCD
BCL2A1	IGHV1-68	MT-ND4L	SDE2
C20orf173	IGHV3-66	MT-RNR1	SELL
C20orf96	IL19	MT-RNR2	SMIM20
CCL20	IL1B	MT-TG	SNORD113-9
CEP20	IP6K3	MYL6	SNRNP25
CSRP3	KCTD7	NANP	SPATA13
CXCR4	KIAA0040	NRBF2	SPATA18
DNAJB12	KLHL15	OR13F1	SQSTM1
DPPA4	KLHL31	OR13H1	SUMO2P1
ENSG00000246477	KRT23	OR4C5	TAS2R19
ENSG00000273933	LINC00303	OR51E1	TM4SF1
ENSG00000293363	LINC02551	OR52N4	TRAV21
EVI2A	LINC02915	PDLIM1	TRBV25OR9-2
FAM90A28P	LINC02991	PELI1	TRBV27
FASLG	LYG1	PLEK	TRBV5-7
FGF23	MARCHF11	PPP1R14A	TREM1
FMO5	MEST	PROK2	TUBB2A
GBP3	MIDN	PXDC1	UBE2J1
GJA1	MIR506	RBP2	WNT5A
GOLGA8Q	MIR557	RBP4
LOPE prediction in the second trimester of pregnancy
HES4	CUL4AP1	ARL2BPP7	ENSG00000257403
BCL10-AS1	ENSG00000287144	OR13C5	KLF8P1
RPL7P9	ENSG00000248611	ENSG00000236986	TMEM231P1
C2CD4D	NDUFB9P1	RNF224	ENSG00000267075
CFHR3	ENSG00000200235	KCNMA1-AS1	ENSG00000261575
CFHR1	ENSG00000248544	MRPL17	ENSG00000289729
RPL13AP11	ENSG00000176515	ENSG00000255340	ENSG00000266489
ENSG00000284376	H4C2	LRP4-AS1	CYP2T1P
ENSG00000234004	SUMO2P1	ENSG00000285388	MYPOP
RBM34	TUBBP9	CXCR5	SPEF1
IGKV3D-20	ENSG00000287825	NTM-AS1	RPL24P9
IGKV3D-11	RPL24P4	LINC02972	FAM3C2P
ENSG00000291126	RPL29P16	IFITM3P6	POU3F4
ENSG00000229682	RPL37P15	LINC02448	TGIF2LX
DPP10-AS1	SMIM11P1	MIR1252	BEX5
ENSG00000290902	SNHG15	COX5AP1	GNG5B
MED28P3	ENSG00000234716	HISLA	ENSG00000235329
CFAP20DC-AS1	SLC29A4P2	IGHJ4	MIR1277
TMED2P1	HIGD1AP6	IGHV5-10-1	ENSG00000286163
RPL34P9	LINC01419	LINC00221	RPS26P56
SDHBP1	MRPS16P1	IGHV3-69-1	TBL1Y
ENOPH1P1	RPL32P21	IGHV1-69-2	MXRA5Y
SRIP1	ENSG00000278001	GOLGA8F
ENSG00000287552	ATP5F1AP10	ENSG00000285974
