# Supplementary material for: Maternal Plasma Cell-Free RNA as a Predictor of Early and Late-Onset Preeclampsia Throughout Pregnancy
Source: Research Square preprint supplement (doi:10.21203/rs.3.rs-5684050/v1), 2025-01-16
Supplement: Supplementary file 2 [file 39b6192cd70482130ba4e871.xlsx]

## Sheet: Table 1
Table 1. Maternal characteristics and pregnancy outcomes for the selected subset of participants. Data are presented as Mean and Standard Deviation (SD) or as percentage where applicable.
Maternal characteristics
Group	Sample size (n)	Maternal age (years)	Maternal BMI (kg/m2)	Primiparous (%)	Smoker (%)	Natural conception (%)
EOPE	42	34.4 (6.3)	28.0 (4.7)	59.5	9.5	80.9
LOPE	43	33.7 (4.7)	26.9 (5.3)	62.8	13.9	94.3
Control	75	34.4 (4.5)	25.0 (3.7)	54.7	8	94.7
Ethnicity / Race
Group	Sample size (n)	Caucasian (%)	African American (%)	Hispanic (%)	Asian (%)	Other (%)
EOPE	42	69	9.5	19	0	2.3
LOPE	43	81	0	13.9	0	4.6
Control	75	92	1.3	6.6	0	0
Preeclampsia symptoms
Group	Sample size (n)	GA at diagnose (weeks)	SBP (mm Hg)	DBP (mm Hg)	Uteroplacental dysfunction (%)	Proteinuria (%)	Pulmonary edema (%)	HELLP (%)	Eclampsia (%)	Severe (%)
EOPE	42	30.0 (3.4)	157.5 (18.9)	98.9 (15.0)	69	80.9	0	14.3	2.4	76.2
LOPE	43	36.5 (1.8)	152.7 (17.3)	93.9 (8.2)	25.6	88.4	2.3	7	0	41.9
Birth outcomes				Birth outcomes
Group	Sample size (n)	GA at delivery (weeks)	Preterm birth (%)	Cesarea (%)	Male fetus (%)	Fetal weight (gr)	SGA (%)	Stillbirth (%)	Mother ICU (%)	Newborn ICU (%)
EOPE	42	32.1 (3.7)	87.8	69	52.4	1520 (557.2)	80.9	11.9	35.2	50
LOPE	43	37.4 (1.6)	41.9	44.2	53.5	2724 (635.5)	39.5	0	18.6	16.3
Control	75	40.0 (1.0)	0	16	38.7	3371 (427.8)	1.3	0	0	0
Abbreviatures used: BMI, Body Mass Index; DBP, diastolic blood pressure; GA, Gestational Age; ; HELLP, Hemolysis, Elevated Liver enzyme levels, and Low Platelet levels; ICU, Intensive Care Unit; NA, Not Applicable; PE, preeclampsia; SBP, Systolic blood pressure; SGA, Small for Gestational Age.
