# Supplementary material for: Maternal Plasma Cell-Free RNA as a Predictor of Early and Late-Onset Preeclampsia Throughout Pregnancy
Source: Research Square preprint supplement (doi:10.21203/rs.3.rs-5684050/v1), 2025-01-16
Supplement: Supplementary file 3 [file 8f6bc49cc56280a2ae5c90af.xlsx]

## Sheet: Supplementary Table 1
Table S1. Gestational age at blood sample collection for patients and controls in the selected subset of participants. Data are presented as Mean and Standard Deviation (SD)
Group	Patients (n)	GA at blood sample collection (weeks)	Time to PE diagnosis (weeks)	Time before delivery (weeks)
Time point of blood sample collection: T1
EOPE	42	12.0 (1.1)	18.0 (4.7)	20.1 (4.0)
LOPE	43	12.0 (1.1)	24.9 (2.1)	25.3 (1.9)
Control	75	12.0 (1.1)	NA	27.9 (1.2)
Time point of blood sample collection: T2
EOPE	41	21.6 (2.3)	8.5 (3.8)	10.6 (3.9)
LOPE	42	22.1 (2.5)	14.9 (3.0)	15.4 (3.0)
Control	75	21.4 (1.9)	NA	18.6 (2.2)
Time point of blood sample collection: T3
EOPE	28	30.8 (3.5)	0.2 (0.49)	1.6 (2.0)
LOPE	36	35.3 (2.0)	0.9 (1.5)	1.4 (1.5)
Control	72	35.0 (1.5)	NA	5.8 (2.3)
Abbreviatures used: NA, not applicable;
