# Supplementary material for: Maternal Plasma Cell-Free RNA as a Predictor of Early and Late-Onset Preeclampsia Throughout Pregnancy
Source: Research Square preprint supplement (doi:10.21203/rs.3.rs-5684050/v1), 2025-01-16
Supplement: Supplementary file 4 [file 9e953def4142655d65cb2430.xlsx]

## Sheet: Supplementary Table 3
Table S3. Differentially abundant cfRNA transcripts at diagnosis in late-onset preeclampsia patients compared to normotensive controls.
cfRNA	Log2FC	P.Value	adj.P.Val
TRAV8-5	0.733979	2.57801e-10	7.56724e-06
RPL7L1P15	0.820568	6.05067e-10	8.88027e-06
ENSG00000249876	1.11599	8.55736e-09	5.02789e-05
ENSG00000253261	0.933458	1.11769e-08	5.02789e-05
ENSG00000220685	0.770792	1.2255e-08	5.02789e-05
KCTD5P1	1.00629	1.39581e-08	5.02789e-05
ENSG00000286450	1.09902	1.52939e-08	5.02789e-05
RPL21P84	0.484901	1.64944e-08	5.02789e-05
ENSG00000233139	0.536681	1.70753e-08	5.02789e-05
ENSG00000233031	0.718816	1.7129e-08	5.02789e-05
CCDC144NL-AS1	0.800111	1.88604e-08	5.03281e-05
CNN3-DT	0.544347	2.15493e-08	5.04302e-05
ENSG00000280432	0.980705	2.53372e-08	5.04302e-05
NDUFA9P1	0.511361	2.61694e-08	5.04302e-05
RPS27AP9	0.707406	2.71838e-08	5.04302e-05
JCADP1	0.701894	2.99144e-08	5.04302e-05
RPS3AP34	0.709144	3.00242e-08	5.04302e-05
RPL22P13	1.04205	3.328e-08	5.04302e-05
NPM1P32	0.623157	3.83959e-08	5.04302e-05
LINC02175	1.03077	3.86869e-08	5.04302e-05
EEF1A1P29	0.556534	4.01428e-08	5.04302e-05
EEF1A1P14	0.513837	4.1079e-08	5.04302e-05
RPL7L1P5	0.680782	4.15262e-08	5.04302e-05
MORF4L1P5	0.719968	4.3463e-08	5.04302e-05
MAP4K3-DT	0.982917	4.43423e-08	5.04302e-05
SLC16A1-AS1	0.949387	4.56254e-08	5.04302e-05
MPHOSPH10P4	1.33404	4.63876e-08	5.04302e-05
NEK2P2	0.718411	4.97305e-08	5.07778e-05
PDCL3P7	0.551123	5.09793e-08	5.07778e-05
PTTG1P2	0.7694	5.1897e-08	5.07778e-05
KDM4A-AS1	0.966235	5.47225e-08	5.18152e-05
RPL21P100	0.490267	5.74087e-08	5.26599e-05
ENSG00000243328	0.739374	6.25721e-08	5.51718e-05
ENSG00000287454	1.22544	6.41821e-08	5.51718e-05
ENSG00000286205	1.10244	6.57858e-08	5.51718e-05
ATP13A3-DT	1.1418	7.36977e-08	5.75942e-05
SNRPGP6	0.809045	7.38708e-08	5.75942e-05
RPSAP10	0.446534	7.59412e-08	5.75942e-05
OSBPL9P4	0.757234	7.82943e-08	5.75942e-05
ATP1B1P1	0.728951	8.03019e-08	5.75942e-05
ENSG00000205695	0.765463	8.04471e-08	5.75942e-05
RPL7AP81	0.801547	8.79647e-08	6.14768e-05
ENSG00000233724	0.823477	9.0088e-08	6.14966e-05
VIPR1-AS1	0.883737	9.45602e-08	6.15788e-05
ENSG00000251417	1.15845	9.59391e-08	6.15788e-05
UPF3AP3	0.496404	9.81027e-08	6.15788e-05
NDUFAF2P2	0.960105	9.86e-08	6.15788e-05
RPS3AP16	0.605013	1.03143e-07	6.30741e-05
FMNL1-DT	1.11666	1.10808e-07	6.35985e-05
PAFAH1B2P1	0.646096	1.1245e-07	6.35985e-05
ENSG00000220748	0.563649	1.14795e-07	6.35985e-05
ENTR1P2	0.495337	1.15105e-07	6.35985e-05
ENSG00000274253	0.74463	1.19313e-07	6.35985e-05
RPS7P3	0.664139	1.21078e-07	6.35985e-05
RPL21P91	0.794255	1.24008e-07	6.35985e-05
NPM1P18	0.553085	1.24445e-07	6.35985e-05
RPL7P50	0.625708	1.24742e-07	6.35985e-05
DNAJB6P5	0.777945	1.25667e-07	6.35985e-05
NPM1P29	0.692809	1.29523e-07	6.44386e-05
ENSG00000288103	0.620117	1.33991e-07	6.55507e-05
ENSG00000237588	1.18627	1.38964e-07	6.60907e-05
LUCAT1	0.904662	1.39598e-07	6.60907e-05
RPL7P45	0.739563	1.45334e-07	6.6671e-05
HADHBP1	0.559254	1.49833e-07	6.6671e-05
HADHAP2	0.40458	1.51746e-07	6.6671e-05
NEK2P4	0.555812	1.52829e-07	6.6671e-05
RPL7AP26	0.584591	1.56684e-07	6.6671e-05
ENSG00000269842	0.683033	1.58973e-07	6.6671e-05
ENSG00000228933	0.913534	1.63701e-07	6.6671e-05
RPL36AP31	0.601286	1.63994e-07	6.6671e-05
ENSG00000228429	0.647431	1.67611e-07	6.6671e-05
RPL21P6	0.606572	1.69746e-07	6.6671e-05
MKI67P1	0.613207	1.70527e-07	6.6671e-05
RPL27AP3	0.726603	1.71513e-07	6.6671e-05
LINC00174	0.559939	1.74015e-07	6.6671e-05
KNOP1P5	0.802182	1.7651e-07	6.6671e-05
ENSG00000250746	0.469848	1.78492e-07	6.6671e-05
ENSG00000250292	0.773172	1.78724e-07	6.6671e-05
RRAS2P2	0.932078	1.83355e-07	6.6671e-05
FUNDC2P4	0.675727	1.85349e-07	6.6671e-05
ENSG00000290399	1.0707	1.86138e-07	6.6671e-05
ENSG00000273329	0.962305	1.86251e-07	6.6671e-05
ENSG00000237345	0.575341	1.89367e-07	6.69697e-05
AARD	0.476746	1.9239e-07	6.72289e-05
RTRAFP2	0.717566	1.95653e-07	6.75648e-05
BRD7P4	0.4966	1.99473e-07	6.80283e-05
RPS26P18	0.641446	2.03754e-07	6.80283e-05
CRADDP1	0.934788	2.03948e-07	6.80283e-05
RPL6P1	0.630059	2.11762e-07	6.97074e-05
RPL21P23	0.833299	2.13732e-07	6.97074e-05
HMGB1P9	0.69472	2.20676e-07	7.11815e-05
LINC01618	0.961416	2.29558e-07	7.14151e-05
PSMD14P1	0.787273	2.30286e-07	7.14151e-05
ENSG00000259192	0.715578	2.3082e-07	7.14151e-05
LRRC37A12P	0.522631	2.31133e-07	7.14151e-05
ENSG00000293223	1.17396	2.37525e-07	7.26259e-05
ENSG00000219553	0.621879	2.48955e-07	7.53358e-05
PPM1AP1	0.655647	2.52133e-07	7.5519e-05
NPM1P2	0.704011	2.57261e-07	7.62766e-05
TPM4P1	0.652268	2.62595e-07	7.66472e-05
ENSG00000285898	0.790516	2.63733e-07	7.66472e-05
LINC00671	0.361219	2.70188e-07	7.73474e-05
FAM204DP	0.781516	2.71413e-07	7.73474e-05
PDE4DIPP8	0.99513	2.75862e-07	7.78593e-05
LINC00621	0.817514	2.80339e-07	7.83693e-05
TERF1P6	0.742086	2.8537e-07	7.88476e-05
ENSG00000248423	0.967316	2.92276e-07	7.88476e-05
NEFMP1	0.475849	2.94455e-07	7.88476e-05
TACC1P1	0.51058	2.9925e-07	7.88476e-05
ENSG00000226965	0.749992	3.04662e-07	7.88476e-05
RPL6P25	0.574989	3.05607e-07	7.88476e-05
ENSG00000271851	1.19327	3.06544e-07	7.88476e-05
NUPR1	0.748098	3.10172e-07	7.88476e-05
RPL27AP5	0.554864	3.12558e-07	7.88476e-05
ENSG00000235582	0.713244	3.13254e-07	7.88476e-05
ENSG00000290577	0.989614	3.14381e-07	7.88476e-05
AK3P6	0.631473	3.15668e-07	7.88476e-05
RPS3AP48	0.569052	3.2261e-07	7.88476e-05
RPSAP50	0.665448	3.22713e-07	7.88476e-05
SLIRPP1	0.802178	3.24952e-07	7.88476e-05
MTRF1LP1	0.602047	3.26722e-07	7.88476e-05
EZH2P1	0.47131	3.3023e-07	7.88476e-05
TPM3P4	0.442909	3.32609e-07	7.88476e-05
H3C11	0.795209	3.33738e-07	7.88476e-05
ZBTB8B	0.934006	3.41374e-07	7.88476e-05
LINC02937	1.02947	3.42946e-07	7.88476e-05
EXT2	-0.159087	3.43197e-07	7.88476e-05
ENSG00000237249	0.810021	3.43832e-07	7.88476e-05
SOCS5P4	0.671793	3.46924e-07	7.89037e-05
SAGE4P	0.628901	3.49453e-07	7.89037e-05
PPP1R8P1	0.520948	3.54682e-07	7.9322e-05
RPL32P1	0.716025	3.56944e-07	7.9322e-05
ENSG00000253336	0.520743	3.63863e-07	7.9322e-05
HNRNPA1P49	0.711898	3.65688e-07	7.9322e-05
LINC01482	0.992836	3.66101e-07	7.9322e-05
MTRF1LP2	0.686004	3.67519e-07	7.9322e-05
ENSG00000272918	1.06729	3.75194e-07	7.98976e-05
TFDP1P2	0.346852	3.7563e-07	7.98976e-05
GCNAP1	0.738611	3.79265e-07	8.00904e-05
HMGN1P26	0.786907	3.8989e-07	8.10805e-05
RPL7L1P19	0.633685	3.94137e-07	8.10805e-05
POGLUT2P1	0.494621	3.98402e-07	8.10805e-05
ENSG00000256625	0.401423	4.01738e-07	8.10805e-05
ENSG00000262370	0.736372	4.01747e-07	8.10805e-05
TCF12-DT	1.07044	4.06653e-07	8.10805e-05
RPL5P10	0.686782	4.09317e-07	8.10805e-05
ENSG00000230175	0.801639	4.09538e-07	8.10805e-05
PTPN11P3	0.522581	4.0992e-07	8.10805e-05
ETF1P1	0.556983	4.1223e-07	8.10805e-05
TP63	-0.177907	4.19132e-07	8.10805e-05
DNAJB6P3	0.920535	4.19175e-07	8.10805e-05
ENSG00000227728	0.539884	4.19863e-07	8.10805e-05
ENSG00000223599	0.486714	4.26612e-07	8.13683e-05
PA2G4P1	0.486955	4.26897e-07	8.13683e-05
ELOC	0.420113	4.31503e-07	8.14699e-05
ENSG00000253362	0.734048	4.32982e-07	8.14699e-05
ZNF652-AS1	1.09539	4.48702e-07	8.27682e-05
LINC00608	0.988246	4.50021e-07	8.27682e-05
PMM2P2	0.654209	4.5077e-07	8.27682e-05
ENSG00000258891	0.911227	4.51161e-07	8.27682e-05
RPL3P1	0.477274	4.61715e-07	8.41784e-05
HMGB1P29	1.00974	4.64785e-07	8.4215e-05
COPS5P1	0.841751	4.71395e-07	8.48495e-05
RPS3AP43	0.505502	4.77949e-07	8.48495e-05
ENSG00000232748	1.05773	4.82818e-07	8.48495e-05
PPIAP60	0.416212	4.85928e-07	8.48495e-05
ENSG00000228181	0.752954	4.86479e-07	8.48495e-05
ZNF337-AS1	0.910308	4.86811e-07	8.48495e-05
ATP5PBP6	0.518677	4.88521e-07	8.48495e-05
ENSG00000286933	1.29079	4.98689e-07	8.57472e-05
IMMTP1	0.508472	4.99532e-07	8.57472e-05
ENSG00000277435	0.614314	5.06256e-07	8.61325e-05
SETP11	0.667632	5.07646e-07	8.61325e-05
ENSG00000261835	1.07728	5.15621e-07	8.67167e-05
LINC02614	0.662969	5.18299e-07	8.67167e-05
DUX4L37	0.632353	5.22148e-07	8.67167e-05
CIR1P3	0.892039	5.32698e-07	8.67167e-05
SDCBPP2	0.604493	5.33649e-07	8.67167e-05
ENSG00000231416	0.65683	5.34639e-07	8.67167e-05
LINC01344	1.01839	5.36132e-07	8.67167e-05
RPL7P58	0.621905	5.36963e-07	8.67167e-05
RPS24P8	0.641294	5.37677e-07	8.67167e-05
RPL7P16	0.695065	5.44314e-07	8.69989e-05
RPL32P4	0.629329	5.4683e-07	8.69989e-05
EEF1A1P38	0.676709	5.48318e-07	8.69989e-05
FAM133GP	0.929882	5.69215e-07	8.92929e-05
TUBAP11	0.421699	5.72065e-07	8.92929e-05
LINC01036	0.384578	5.72898e-07	8.92929e-05
SELENOWP1	0.697632	5.77177e-07	8.92929e-05
COX11P1	0.55806	5.77987e-07	8.92929e-05
ENSG00000229288	0.815724	5.81595e-07	8.93799e-05
ENSG00000286782	0.949437	5.84782e-07	8.94015e-05
LINC00683	0.878066	5.884e-07	8.94886e-05
HMGB2P1	0.64175	5.94095e-07	8.9889e-05
LINC01115	0.689851	6.00793e-07	9.01588e-05
RPS3AP13	0.670819	6.08877e-07	9.01588e-05
RPL7AP41	0.622438	6.13446e-07	9.01588e-05
PSMA3-AS1	0.848184	6.14199e-07	9.01588e-05
ENSG00000267404	0.64851	6.16144e-07	9.01588e-05
ENSG00000250376	0.688672	6.17531e-07	9.01588e-05
RPL5P29	0.614268	6.18939e-07	9.01588e-05
FHL1P1	0.645273	6.20451e-07	9.01588e-05
RPA2P2	0.641447	6.30031e-07	9.0468e-05
PSMC1P8	0.58515	6.30266e-07	9.0468e-05
RPS3AP19	0.560151	6.31824e-07	9.0468e-05
NOLC1P1	0.611669	6.49219e-07	9.25074e-05
ENSG00000215263	0.760732	6.55518e-07	9.29538e-05
TMEM51-AS1	0.888463	6.5872e-07	9.29587e-05
ENSG00000229369	0.73377	6.67578e-07	9.31315e-05
RPSAP59	0.654164	6.68913e-07	9.31315e-05
KBTBD6-DT	0.978029	6.69463e-07	9.31315e-05
EEF1A1P10	0.494793	6.80936e-07	9.39291e-05
ARL6IP1P1	0.749416	6.81597e-07	9.39291e-05
RPS3AP25	0.512714	6.89097e-07	9.4519e-05
ZNF587P1	0.677137	6.92571e-07	9.45536e-05
SRP19	0.518391	7.05396e-07	9.48013e-05
ENSG00000280138	0.80872	7.06019e-07	9.48013e-05
ENSG00000235726	0.775128	7.08827e-07	9.48013e-05
ENSG00000279652	0.955268	7.10489e-07	9.48013e-05
SRRM1P3	0.381624	7.16183e-07	9.48013e-05
HSPE1	0.517917	7.17383e-07	9.48013e-05
LINC03013	1.08902	7.19353e-07	9.48013e-05
GSTA7P	0.640757	7.23455e-07	9.48013e-05
ENSG00000291015	0.793119	7.26141e-07	9.48013e-05
PGAM1P3	0.852184	7.32774e-07	9.48013e-05
SETP8	0.656422	7.45662e-07	9.48013e-05
FZD4	0.497079	7.46985e-07	9.48013e-05
PPIAP84	0.481451	7.47995e-07	9.48013e-05
LINC02547	0.969379	7.50578e-07	9.48013e-05
PAX8-AS1	0.886587	7.55171e-07	9.48013e-05
RPS3AP37	0.546021	7.5581e-07	9.48013e-05
CBLIF	-0.219966	7.57008e-07	9.48013e-05
ENSG00000229618	0.977108	7.63848e-07	9.48013e-05
WEE2P1	0.709497	7.64762e-07	9.48013e-05
ENSG00000236713	0.877429	7.64825e-07	9.48013e-05
ENSG00000230203	0.602111	7.70314e-07	9.48013e-05
RPL3P3	0.411418	7.70592e-07	9.48013e-05
GCSHP2	0.759364	7.74403e-07	9.48013e-05
ENSG00000287860	0.874962	7.74684e-07	9.48013e-05
BRD7P2	0.245986	7.76046e-07	9.48013e-05
IPMKP1	0.540124	7.78357e-07	9.48013e-05
ENSG00000215795	0.479833	7.83078e-07	9.49626e-05
NPM1P43	0.764403	7.86697e-07	9.49626e-05
RPL7P11	0.581078	7.90691e-07	9.49626e-05
RPS3AP7	0.479387	7.92622e-07	9.49626e-05
ENSG00000270935	0.927035	8.0285e-07	9.55402e-05
BBOX1-AS1	0.880475	8.06617e-07	9.55402e-05
HNRNPA1P69	0.62008	8.08999e-07	9.55402e-05
RPS23P7	0.687495	8.12787e-07	9.55402e-05
SNX19P1	0.485451	8.14685e-07	9.55402e-05
KARS1P1	0.579182	8.16972e-07	9.55402e-05
SPOPLP1	0.78359	8.37973e-07	9.70435e-05
TCP1P1	0.44663	8.38325e-07	9.70435e-05
HNRNPA1P21	0.519793	8.39745e-07	9.70435e-05
CIBAR1P2	0.598171	8.43575e-07	9.70782e-05
TMT1A	1.00352	8.49637e-07	9.70782e-05
ENSG00000287671	0.923477	8.49968e-07	9.70782e-05
PTCHD3P3	0.760383	8.61364e-07	9.79985e-05
RPL7P26	0.427823	8.65031e-07	9.80182e-05
SEPTIN14P12	0.549594	8.71082e-07	9.80182e-05
MRPL48P1	0.569793	8.71555e-07	9.80182e-05
ENSG00000265494	0.962627	8.83156e-07	9.86444e-05
ENSG00000251572	0.432487	8.85669e-07	9.86444e-05
ENSG00000266932	0.612024	8.87205e-07	9.86444e-05
RPL9P14	0.552768	9.00277e-07	9.96291e-05
RPL7P55	0.856677	9.02849e-07	9.96291e-05
RPL7P54	0.7055	9.09124e-07	9.96293e-05
ENSG00000290976	0.989106	9.09639e-07	9.96293e-05
RPL3P12	0.608167	9.26671e-07	0.000100164
LINC00506	0.94518	9.30911e-07	0.000100164
SMSP1	0.64666	9.30968e-07	0.000100164
ENSG00000270614	0.678053	9.34396e-07	0.000100164
FOXN3P1	0.632296	9.35205e-07	0.000100164
RPL7L1	0.294607	9.38788e-07	0.000100164
ENSG00000253198	0.720033	9.39161e-07	0.000100164
EEF1GP7	0.836954	9.41847e-07	0.000100164
ENSG00000224785	0.508015	9.45233e-07	0.000100164
HSPD1P8	0.817855	9.59456e-07	0.000101305
ENSG00000254590	0.758624	9.6474e-07	0.000101498
ENSG00000275598	0.840273	9.689e-07	0.000101572
ENSG00000267787	0.513324	9.78728e-07	0.000101867
EEF1A1P1	0.509568	9.81973e-07	0.000101867
CBX3P1	0.80589	9.8213e-07	0.000101867
RPL21P55	0.510687	9.93129e-07	0.000102147
TXNP4	0.549709	9.94638e-07	0.000102147
CCNYL6	0.552415	9.95261e-07	0.000102147
ENSG00000284703	1.11006	1.00148e-06	0.000102427
LRP2	-0.132208	1.0064e-06	0.000102572
ENSG00000271681	0.519787	1.01253e-06	0.00010284
RPL6P2	0.733633	1.019e-06	0.00010294
KRT8P1	0.448851	1.0216e-06	0.00010294
KCNRG	0.938617	1.02702e-06	0.00010294
ENSG00000291089	0.897917	1.02826e-06	0.00010294
ENSG00000280384	1.09088	1.03697e-06	0.00010294
OR10K1	-0.32219	1.0415e-06	0.00010294
ENSG00000248493	0.465426	1.04165e-06	0.00010294
ENSG00000243129	0.567727	1.04379e-06	0.00010294
ENSG00000235683	0.588537	1.05508e-06	0.00010294
MDH1P1	0.745981	1.0594e-06	0.00010294
NLRP9P1	0.535746	1.06022e-06	0.00010294
OFD1P17	0.435699	1.06155e-06	0.00010294
NSA2P1	0.557988	1.06442e-06	0.00010294
RPS20P4	0.601835	1.06678e-06	0.00010294
RPL12P37	0.598409	1.06931e-06	0.00010294
RPS27AP19	0.693749	1.07148e-06	0.00010294
RBPJP7	0.822306	1.07313e-06	0.00010294
ENSG00000251484	0.624429	1.0769e-06	0.000102965
SOD2	0.415555	1.0839e-06	0.000103033
LINC02934	0.741052	1.08463e-06	0.000103033
ENSG00000225923	0.62221	1.09342e-06	0.000103533
RPS3AP40	0.473384	1.10463e-06	0.000104258
ATP5F1CP1	0.429932	1.12178e-06	0.000105538
DNAJC8P3	0.696403	1.13266e-06	0.000105688
TPT1P14	1.07343	1.13313e-06	0.000105688
ENSG00000186244	0.752258	1.13854e-06	0.000105688
HEBP2P1	0.710461	1.14276e-06	0.000105688
ENSG00000249148	0.465405	1.15011e-06	0.000105688
RPS4XP1	0.429824	1.15094e-06	0.000105688
NPM1P48	0.504593	1.15195e-06	0.000105688
RRBP1P1	0.567972	1.15219e-06	0.000105688
PTGES3P2	0.606058	1.1632e-06	0.00010575
GLB1	-0.233694	1.1635e-06	0.00010575
ENSG00000254162	0.88672	1.16367e-06	0.00010575
THRAP3P3	0.573963	1.17096e-06	0.000105801
CBR3-AS1	0.870127	1.17144e-06	0.000105801
ENSG00000239920	0.878301	1.18526e-06	0.000106721
ENSG00000279175	0.848824	1.1912e-06	0.000106928
ENSG00000249604	1.10287	1.19576e-06	0.000107009
FBN2	-0.139803	1.19953e-06	0.00010702
ENSG00000225603	0.359156	1.21572e-06	0.000108136
RPL37AP8	0.862688	1.22287e-06	0.00010824
RPL9P16	0.719973	1.2253e-06	0.00010824
RPL34P34	0.53143	1.23096e-06	0.00010824
RPL17P45	0.688653	1.23164e-06	0.00010824
ZNF8	0.884267	1.2367e-06	0.00010826
ENSG00000260109	0.874655	1.2405e-06	0.00010826
HMGN1P37	0.559839	1.247e-06	0.00010826
FTOP1	0.550125	1.25265e-06	0.00010826
ENSG00000235286	0.584007	1.25839e-06	0.00010826
MT-ND5	2.50643	1.26e-06	0.00010826
ENSG00000287516	0.925791	1.26163e-06	0.00010826
ENSG00000231353	0.80886	1.26241e-06	0.00010826
RPL17P31	0.540435	1.26653e-06	0.00010826
TARDBPP4	0.543787	1.27216e-06	0.00010826
PCNPP1	0.697864	1.27243e-06	0.00010826
PDSS1P2	0.391463	1.27963e-06	0.000108558
DPPA4P2	0.995763	1.28532e-06	0.000108726
FBN1	-0.123766	1.29321e-06	0.000109079
NNT-AS1	0.697533	1.31293e-06	0.000110238
HAL	-0.148155	1.3176e-06	0.000110238
ENSG00000279159	0.626082	1.32158e-06	0.000110238
SKP2P1	0.649079	1.32363e-06	0.000110238
RPS15AP11	0.566718	1.32674e-06	0.000110238
RPL22P16	0.659098	1.32948e-06	0.000110238
ENSG00000231616	0.906599	1.34488e-06	0.000111081
DDX18P6	0.61565	1.34721e-06	0.000111081
ARL2BPP2	0.945936	1.36925e-06	0.000112582
HRG-AS1	0.592876	1.38103e-06	0.000113039
RPL7AP15	0.733774	1.38251e-06	0.000113039
ENSG00000279714	0.882507	1.39139e-06	0.000113245
GBP1P1	0.23251	1.39275e-06	0.000113245
HCG18	0.889013	1.39948e-06	0.000113477
RPL29P21	0.773385	1.40872e-06	0.000113912
CCDC18-AS1	0.984198	1.42657e-06	0.000115039
RPL17P27	0.429571	1.43407e-06	0.000115078
NBPF13P	0.341667	1.43549e-06	0.000115078
MTERF1P1	1.08183	1.44406e-06	0.000115078
RPL7L1P20	0.752087	1.44494e-06	0.000115078
RSL24D1P3	0.72486	1.45004e-06	0.000115078
PLCG1-AS1	0.711961	1.45422e-06	0.000115078
HNRNPA1P60	0.470225	1.4545e-06	0.000115078
ENSG00000228354	0.518269	1.47229e-06	0.000116173
BLOC1S6P1	0.943959	1.48218e-06	0.000116345
OIP5-AS1	0.676834	1.48246e-06	0.000116345
RPS15AP14	0.715959	1.48637e-06	0.000116345
ST13P21	0.594164	1.49192e-06	0.00011637
HSP90AB5P	0.603853	1.49462e-06	0.00011637
ENSG00000226971	0.434519	1.51514e-06	0.000117656
ZCRB1P1	0.558625	1.52726e-06	0.000117901
MCM8	0.346632	1.53e-06	0.000117901
ENSG00000273876	0.589708	1.53364e-06	0.000117901
HAUS1P1	0.384903	1.53437e-06	0.000117901
LINC03098	0.906248	1.5409e-06	0.000118094
MIPEPP1	0.605667	1.54854e-06	0.000118371
MSL3P2	0.466892	1.56556e-06	0.000119361
PSMC1P6	0.639322	1.57572e-06	0.000119648
CARMIL2P1	0.996793	1.57915e-06	0.000119648
RPS4XP8	0.533613	1.5855e-06	0.000119648
ENSG00000248837	0.946375	1.58564e-06	0.000119648
ENSG00000286548	1.00986	1.60078e-06	0.000120181
OR2W1	-0.288014	1.60838e-06	0.000120181
RPL10P2	0.620749	1.60852e-06	0.000120181
ENSG00000289062	1.1211	1.61082e-06	0.000120181
ENSG00000257078	0.52311	1.61317e-06	0.000120181
DPP3P1	0.454881	1.63631e-06	0.00012136
AFG3L2P1	0.43889	1.63727e-06	0.00012136
PPIEL	0.569848	1.6468e-06	0.000121546
PSMA2P3	0.544237	1.64805e-06	0.000121546
PPIAP83	0.628604	1.66702e-06	0.000122637
LINC01226	0.888506	1.68312e-06	0.000123313
ENSG00000272840	0.607164	1.68462e-06	0.000123313
GBA1	-0.363468	1.70065e-06	0.000123778
RPL34P20	0.679628	1.70285e-06	0.000123778
PPIAP81	0.574935	1.70361e-06	0.000123778
GRASLND	1.03217	1.71279e-06	0.000124137
RPL35AP23	0.92634	1.72847e-06	0.000124714
ENSG00000231744	0.58577	1.72925e-06	0.000124714
RPL21P83	0.447378	1.73751e-06	0.000124834
MITA1	1.03133	1.74291e-06	0.000124834
ENSG00000263199	0.848994	1.74367e-06	0.000124834
NPLP1	0.614665	1.78095e-06	0.000127193
RPL21P96	0.716986	1.78604e-06	0.000127209
RPL21P8	0.500946	1.78984e-06	0.000127209
ENSG00000240296	0.717429	1.80763e-06	0.000128163
LDHAP3	0.452205	1.81643e-06	0.000128476
ENSG00000229021	0.655213	1.82444e-06	0.000128732
ELF3-AS1	0.845912	1.83759e-06	0.000129256
CDK5P1	0.492543	1.84066e-06	0.000129256
RPL36AP6	0.723898	1.85821e-06	0.000130177
KANTR	0.767149	1.87288e-06	0.000130277
SALL4P1	0.478042	1.87457e-06	0.000130277
ENSG00000285906	0.968626	1.87518e-06	0.000130277
EEF1GP1	0.45647	1.87739e-06	0.000130277
TPT1-AS1	0.905824	1.88549e-06	0.000130531
PAICSP5	0.723006	1.90994e-06	0.000130869
PDCL3P6	0.394159	1.91645e-06	0.000130869
KLHL7-DT	0.921998	1.91705e-06	0.000130869
ENSG00000267293	0.511195	1.91835e-06	0.000130869
RPL32P5	0.598855	1.91893e-06	0.000130869
NXF4	0.505125	1.91906e-06	0.000130869
ENSG00000223402	0.640228	1.92582e-06	0.000130869
ENSG00000238081	0.621039	1.93251e-06	0.000130869
RPL26P19	0.518029	1.93567e-06	0.000130869
ENSG00000253361	1.01546	1.93602e-06	0.000130869
ENSG00000291133	0.514756	1.94005e-06	0.000130869
RPS3AP22	0.676712	1.94389e-06	0.000130869
MAP3K9-DT	0.96368	1.96202e-06	0.000131463
ENSG00000214526	0.496891	1.9658e-06	0.000131463
NHP2P2	0.522807	1.96615e-06	0.000131463
DHX9P1	0.468961	1.97491e-06	0.000131749
CBX3P9	0.526671	1.99534e-06	0.00013245
RPL26P13	0.7016	1.99745e-06	0.00013245
RPL35AP32	0.795988	2.00372e-06	0.00013245
RPS27AP11	0.495668	2.00635e-06	0.00013245
MAPRE3-AS1	0.938056	2.00798e-06	0.00013245
C15orf40	0.284315	2.02246e-06	0.000132802
SLC25A5P7	0.612475	2.02354e-06	0.000132802
TUBBP3	0.716987	2.02688e-06	0.000132802
STXBP1	-0.252076	2.04065e-06	0.000133406
RPS4XP23	0.748078	2.06301e-06	0.000134319
RPL7L1P11	0.431036	2.06376e-06	0.000134319
LINC00598	0.963543	2.07449e-06	0.000134438
FREM2	-0.125516	2.07476e-06	0.000134438
PART1	0.840629	2.08665e-06	0.000134858
MT-ND4	2.60122	2.09398e-06	0.000134858
ENSG00000290812	0.432893	2.09502e-06	0.000134858
RPL7P57	0.439773	2.10496e-06	0.000135201
ENSG00000233388	0.522503	2.11927e-06	0.000135823
ENSG00000293278	0.945159	2.12773e-06	0.000136068
MFFP1	0.721642	2.17473e-06	0.000138771
ENSG00000268205	1.01356	2.18276e-06	0.00013879
EEF1B2P7	0.551667	2.18448e-06	0.00013879
ENSG00000279467	0.565523	2.19498e-06	0.000139123
VDAC1P4	0.548076	2.19921e-06	0.000139123
PSMC1P13	0.669653	2.21983e-06	0.000139657
TRDN-AS1	1.0695	2.21993e-06	0.000139657
ENSG00000231357	0.644921	2.23706e-06	0.000139657
ENSG00000213486	0.819572	2.2499e-06	0.000139657
ENSG00000258072	0.643212	2.25218e-06	0.000139657
BNC2	-0.183231	2.25229e-06	0.000139657
ENSG00000241494	0.491424	2.25325e-06	0.000139657
ENSG00000271664	1.03537	2.25533e-06	0.000139657
NCAPGP1	0.682739	2.25957e-06	0.000139657
PTPN11P1	0.369745	2.26191e-06	0.000139657
DNAJC8P1	0.473294	2.26662e-06	0.000139657
ENSG00000218337	0.734187	2.26941e-06	0.000139657
ENSG00000279133	1.10064	2.2761e-06	0.000139657
RBM22P13	0.752064	2.27779e-06	0.000139657
HMGB3P26	0.774904	2.27901e-06	0.000139657
ENSG00000291072	0.886757	2.28683e-06	0.000139704
ABRAXAS1P1	0.564865	2.29245e-06	0.000139704
ENSG00000285563	0.982745	2.29406e-06	0.000139704
GNPATP	0.628151	2.30811e-06	0.000139815
ENSG00000234784	0.705227	2.30922e-06	0.000139815
RPL7L1P12	0.681959	2.31016e-06	0.000139815
ENSG00000293110	0.779522	2.3217e-06	0.000140224
HNRNPA1P18	0.83948	2.33925e-06	0.000140629
RPL21P109	0.595691	2.35214e-06	0.000140629
Metazoa_SRP	0.853588	2.35227e-06	0.000140629
TRPC6P6	0.594005	2.36091e-06	0.000140629
HULC	0.835615	2.36394e-06	0.000140629
MIR548XHG	0.897975	2.36613e-06	0.000140629
MIR193BHG	0.936956	2.37196e-06	0.000140629
LINC01152	0.987187	2.37299e-06	0.000140629
FAT1P1	0.643609	2.37743e-06	0.000140629
ENSG00000217612	0.435864	2.37761e-06	0.000140629
ENSG00000277287	0.977842	2.38191e-06	0.000140629
NLRP2B	0.451284	2.38871e-06	0.000140629
MAP2K4P1	0.413038	2.39093e-06	0.000140629
EIF4E2P2	0.518621	2.39625e-06	0.000140629
GXYLT1P7	0.669446	2.40369e-06	0.000140629
CARMN	0.763928	2.40506e-06	0.000140629
IMPDH1P3	0.406597	2.42065e-06	0.000141062
KRT18P51	0.447942	2.42435e-06	0.000141062
FNDC7	-0.206422	2.43376e-06	0.000141062
ARL14EPP1	0.789558	2.44034e-06	0.000141062
ENSG00000231984	0.844155	2.44212e-06	0.000141062
CCT6P3	0.586383	2.44955e-06	0.000141062
RBBP4P4	0.452692	2.45e-06	0.000141062
ENSG00000237719	0.649986	2.45091e-06	0.000141062
TMEM161BP1	0.416419	2.45683e-06	0.000141126
SP2-DT	0.921004	2.46653e-06	0.000141407
CPEB1-AS1	1.0993	2.49749e-06	0.000142902
HSPE1P5	0.600006	2.50404e-06	0.000142998
HMGB1P31	0.666195	2.51831e-06	0.000143343
ENSG00000254471	0.536882	2.52064e-06	0.000143343
ENSG00000225616	0.516966	2.52923e-06	0.000143343
ZNF402P	0.400773	2.52962e-06	0.000143343
NPM1P22	0.532373	2.54088e-06	0.000143704
ARMC8P1	0.531454	2.54662e-06	0.000143752
EIF4A2P4	0.465916	2.56705e-06	0.000144627
ANKRD9	0.96879	2.57324e-06	0.000144698
ENSG00000237434	0.583781	2.58033e-06	0.000144819
NDUFAF4P2	0.518668	2.58645e-06	0.000144886
GOLGA2P4	0.476603	2.59309e-06	0.000144981
ENSG00000257616	0.417439	2.59809e-06	0.000144984
ENSG00000246465	0.949834	2.61042e-06	0.000145396
ENSG00000253499	0.592884	2.64517e-06	0.000146957
CTNND1	0.437579	2.64845e-06	0.000146957
RARS1P1	0.746031	2.65957e-06	0.000147295
RPL7P59	0.611356	2.67274e-06	0.000147649
ENSG00000240174	0.61406	2.67602e-06	0.000147649
CRTC1P1	0.470525	2.69194e-06	0.000148248
ENSG00000230773	0.901368	2.70642e-06	0.000148279
GAPDHP33	0.715887	2.70689e-06	0.000148279
HSPD1P7	0.488034	2.70764e-06	0.000148279
NRSN2-AS1	0.930844	2.7187e-06	0.000148427
SUCLA2P3	0.418962	2.72544e-06	0.000148427
LINC01563	1.09233	2.72553e-06	0.000148427
RPL13AP23	0.657731	2.73855e-06	0.00014886
TPT1P12	1.05756	2.75018e-06	0.000149117
E2F3P2	0.58693	2.75959e-06	0.000149117
LINC02945	0.781434	2.76163e-06	0.000149117
ENSG00000291156	0.730691	2.77209e-06	0.000149117
LDHBP2	0.529367	2.77771e-06	0.000149117
RPS3AP11	0.647365	2.77779e-06	0.000149117
SETP17	0.802481	2.78267e-06	0.000149117
BTF3P12	0.565678	2.789e-06	0.000149117
CRYZL2P	1.03384	2.79282e-06	0.000149117
ENSG00000233454	0.636871	2.79407e-06	0.000149117
ENSG00000224570	0.821802	2.80797e-06	0.000149518
RPL7L1P2	0.619657	2.81178e-06	0.000149518
NIPA2P2	0.905185	2.82541e-06	0.000149972
ENSG00000279738	0.823728	2.83418e-06	0.000150165
LINC03059	0.929055	2.85891e-06	0.000150818
C9orf78P1	0.728914	2.86769e-06	0.000150818
DLEU2	0.736631	2.87113e-06	0.000150818
C8A	-0.181662	2.87248e-06	0.000150818
LINC00958	0.921581	2.87675e-06	0.000150818
RPL5P8	0.666528	2.87732e-06	0.000150818
DDX18P4	0.554273	2.88591e-06	0.000150877
RPL7P17	0.478875	2.89114e-06	0.000150877
RPSAP2	0.345818	2.89386e-06	0.000150877
TMCC1P1	0.555327	2.90398e-06	0.000150965
HADHAP1	0.405036	2.90583e-06	0.000150965
RPL32P32	0.706757	2.92368e-06	0.000151479
ENSG00000229738	0.556682	2.92605e-06	0.000151479
XRCC6P3	0.549283	2.93271e-06	0.000151556
RPS27P6	0.61975	2.94515e-06	0.000151817
RBM39P1	0.449825	2.94811e-06	0.000151817
RPL32P12	0.4999	2.96969e-06	0.000152661
ENSG00000234271	0.867111	2.98668e-06	0.000153189
PDCL2P1	0.615536	2.9904e-06	0.000153189
ENSG00000291299	0.890045	3.01775e-06	0.000154321
RAD52P1	0.482524	3.02878e-06	0.000154615
MORF4L2P1	0.570712	3.04588e-06	0.000155218
HSP90AB2P	0.531964	3.05568e-06	0.000155333
PSMC1P10	0.375593	3.05872e-06	0.000155333
ENSG00000232176	0.649816	3.0651e-06	0.000155389
RPL21P111	0.505365	3.08819e-06	0.000156289
CENPUP1	0.770465	3.11682e-06	0.000156727
CHCHD3P1	0.633161	3.11885e-06	0.000156727
ENSG00000273674	0.96783	3.13054e-06	0.000156727
ENSG00000291007	0.572013	3.13621e-06	0.000156727
ENSG00000227058	0.564581	3.137e-06	0.000156727
RPL21P67	0.648765	3.13794e-06	0.000156727
ENSG00000223651	0.35859	3.13837e-06	0.000156727
RPAP2P1	0.64778	3.14467e-06	0.000156727
RPA3P2	0.573222	3.14565e-06	0.000156727
RPL21P27	0.573082	3.15523e-06	0.000156727
AIFM1P1	0.571033	3.15935e-06	0.000156727
KLHL10	-0.199563	3.16092e-06	0.000156727
ENSG00000261549	0.527044	3.18974e-06	0.000157889
HNRNPA1P66	0.611622	3.20304e-06	0.00015814
OR5AK1P	0.657761	3.21071e-06	0.00015814
PPIAP43	0.357804	3.2151e-06	0.00015814
HSP90AA6P	0.537879	3.21636e-06	0.00015814
NDUFA5P5	0.874085	3.23143e-06	0.000158473
CENPNP1	0.840066	3.24178e-06	0.000158473
RPSAP33	0.560609	3.24847e-06	0.000158473
GOLGA5P1	0.508845	3.26461e-06	0.000158473
ENSG00000237788	0.505572	3.26719e-06	0.000158473
ENSG00000230291	0.493331	3.26984e-06	0.000158473
RPL10AP1	0.720637	3.27072e-06	0.000158473
LRAT	-0.201552	3.27121e-06	0.000158473
CBX1P3	0.610966	3.27899e-06	0.000158473
RPL5P24	0.594836	3.2811e-06	0.000158473
KRT18P19	0.393747	3.28529e-06	0.000158473
ENSG00000242588	0.44141	3.28791e-06	0.000158473
MRPS17P1	0.941835	3.29932e-06	0.000158547
TDGF1P7	0.474955	3.30026e-06	0.000158547
NPM1P47	0.770627	3.32542e-06	0.000159068
NUFIP1P1	0.357641	3.32699e-06	0.000159068
ARFGEF2	-0.123213	3.32736e-06	0.000159068
CBX3P8	0.918506	3.34252e-06	0.000159443
RPL6P12	0.79776	3.34607e-06	0.000159443
RPL21P2	0.428749	3.36237e-06	0.000159961
RPL7L1P4	0.693952	3.38174e-06	0.000160622
HMGB3P5	0.748231	3.39386e-06	0.000160937
SMARCE1P6	0.552437	3.42137e-06	0.00016198
ENSG00000232337	0.809915	3.44499e-06	0.00016224
COPB2-DT	0.883481	3.44673e-06	0.00016224
GTF2IP14	0.585422	3.44718e-06	0.00016224
NGRNP2	0.544502	3.44898e-06	0.00016224
IMPDH1P8	0.402102	3.45455e-06	0.000162242
CUBNP3	0.420895	3.46985e-06	0.000162701
HSPA9P1	0.315292	3.49863e-06	0.000163788
SLC25A5P6	0.623663	3.5107e-06	0.000164092
CTNNB1	-0.167978	3.52432e-06	0.000164412
RPL21P35	0.475622	3.53361e-06	0.000164412
LINC02261	1.23346	3.53435e-06	0.000164412
ANKRD11P1	0.423915	3.54836e-06	0.000164618
RALBP1P2	0.520144	3.55429e-06	0.000164618
NPM1P31	0.516982	3.55561e-06	0.000164618
RPL32P36	0.550404	3.58309e-06	0.000165629
RPL11P4	0.589808	3.59141e-06	0.000165753
GDNF-AS1	0.920764	3.61736e-06	0.000166461
RPL26P35	0.680817	3.62423e-06	0.000166461
RPL6P21	0.702141	3.63312e-06	0.000166461
ENSG00000280187	1.03107	3.6348e-06	0.000166461
RAP1BP2	0.863201	3.65252e-06	0.000166461
ZNF284	1.06919	3.65379e-06	0.000166461
SLC45A2	-0.228182	3.67162e-06	0.000166461
RPL5P6	0.450693	3.67503e-06	0.000166461
ENSG00000243659	0.755463	3.68022e-06	0.000166461
LINC00491	0.864045	3.68258e-06	0.000166461
TRPC6P8	0.598661	3.68541e-06	0.000166461
MOCS2-DT	1.12763	3.69023e-06	0.000166461
ASS1P9	0.318741	3.6911e-06	0.000166461
PPIAP53	0.50628	3.69319e-06	0.000166461
OCA2	-0.216735	3.70789e-06	0.000166461
TMEM88B	0.868855	3.71322e-06	0.000166461
ENSG00000257169	0.655595	3.71788e-06	0.000166461
ENSG00000232166	0.628411	3.7184e-06	0.000166461
ENSG00000228793	0.968731	3.72928e-06	0.000166461
RPL21P70	0.776458	3.72961e-06	0.000166461
SIRPB3P	0.596058	3.73638e-06	0.000166461
ILRUNP1	0.519968	3.74e-06	0.000166461
RPS3AP29	0.493074	3.74436e-06	0.000166461
LINC01012	0.919375	3.74678e-06	0.000166461
NAP1L4P1	0.479562	3.75219e-06	0.000166461
EEF1GP2	0.455131	3.75421e-06	0.000166461
TXNP1	0.770922	3.78536e-06	0.000167589
KIAA1191P3	0.673141	3.79635e-06	0.000167822
TMIE	-0.401268	3.81361e-06	0.000168332
UBE2L2	0.883333	3.8257e-06	0.000168612
HNRNPA3P8	0.491769	3.83865e-06	0.00016893
ENSG00000253571	0.418853	3.84845e-06	0.000169011
PARLP1	0.496631	3.85486e-06	0.000169011
ST13P12	0.446662	3.85777e-06	0.000169011
TMED2-DT	0.880102	3.88554e-06	0.000169748
RBM22P2	0.879668	3.88616e-06	0.000169748
ENSG00000220913	0.563838	3.89826e-06	0.000170023
ENSG00000255853	0.688033	3.92974e-06	0.000171047
ENSG00000262966	0.855943	3.94086e-06	0.000171047
RPL12P44	0.710272	3.94102e-06	0.000171047
ARPC1AP4	0.530286	3.94505e-06	0.000171047
ENSG00000277159	1.088	3.98283e-06	0.000172114
TMA16P1	0.693031	3.99284e-06	0.000172114
LINC02732	0.686068	3.99299e-06	0.000172114
ENSG00000258578	0.67051	3.99926e-06	0.000172114
ENSG00000242729	0.921298	4.00959e-06	0.000172114
LIMK2P1	0.620562	4.0152e-06	0.000172114
LRRC37A4P	-1.03268	4.02282e-06	0.000172114
PWWP2AP1	0.840554	4.0264e-06	0.000172114
PTGES3L	0.57301	4.03231e-06	0.000172114
HMGB3P11	0.609874	4.03976e-06	0.000172114
ENSG00000286141	0.953847	4.04973e-06	0.000172114
NACAP2	0.511171	4.05548e-06	0.000172114
STX18-AS1	0.735848	4.06092e-06	0.000172114
SEPTIN7P8	0.614157	4.06328e-06	0.000172114
PMPCAP1	0.474482	4.06842e-06	0.000172114
TRAJ32	-0.581496	4.07223e-06	0.000172114
SSBL5P	0.625461	4.07491e-06	0.000172114
RPL23AP91	0.659482	4.07519e-06	0.000172114
HNRNPA3P14	0.471206	4.09147e-06	0.000172553
RPL31P44	0.683125	4.09954e-06	0.000172645
ENSG00000249562	0.76595	4.11984e-06	0.000173252
RELN	-0.103574	4.14174e-06	0.00017334
KRT8P24	0.435328	4.14535e-06	0.00017334
NPM1P36	0.694606	4.15154e-06	0.00017334
RPL23P2	0.669446	4.155e-06	0.00017334
ENSG00000285877	0.995589	4.15983e-06	0.00017334
SALL1P1	0.291658	4.16584e-06	0.00017334
STXBP5-AS1	0.956687	4.16622e-06	0.00017334
ENSG00000276375	0.940604	4.17079e-06	0.00017334
CASP3P1	0.585191	4.17509e-06	0.00017334
RLIG1P3	0.604097	4.18768e-06	0.000173502
ENSG00000251193	0.545323	4.19082e-06	0.000173502
RPLP0P11	0.774328	4.21318e-06	0.00017369
HSPA8P16	0.498512	4.21631e-06	0.00017369
RPL39P33	0.696053	4.22966e-06	0.00017369
SOX9-AS1	0.909252	4.23073e-06	0.00017369
ENSG00000259632	0.563992	4.23254e-06	0.00017369
KRTAP25-1	0.648623	4.2365e-06	0.00017369
SLC6A6P1	0.474091	4.23677e-06	0.00017369
SAP18P2	0.519688	4.24802e-06	0.000173908
LINC-ROR	0.86256	4.27811e-06	0.000174896
RUNDC3A-AS1	0.746653	4.30396e-06	0.000175708
ENSG00000255342	0.663232	4.31853e-06	0.000175889
CAPZA1P3	0.494209	4.32038e-06	0.000175889
WHSC1L2P	0.484679	4.35371e-06	0.000177001
LINC03092	0.733679	4.37445e-06	0.000177598
ENSG00000258012	0.518972	4.3939e-06	0.000177988
PSMA1P1	0.452637	4.39618e-06	0.000177988
RPL7P25	0.549746	4.42224e-06	0.000178676
PEX12P1	0.452601	4.42535e-06	0.000178676
RPL29P16	0.725007	4.45824e-06	0.000179757
RPL12P31	0.686026	4.46839e-06	0.000179767
ENSG00000259924	0.393253	4.47724e-06	0.000179767
HNRNPA1P65	0.537766	4.48004e-06	0.000179767
MICOS10P2	0.561661	4.48867e-06	0.000179767
HNRNPA1P11	0.487034	4.48912e-06	0.000179767
NCLP1	0.610801	4.5096e-06	0.000180341
ACTBP14	0.443192	4.51866e-06	0.000180458
ENSG00000253153	0.682989	4.55432e-06	0.000181572
ENSG00000277270	1.13728	4.56373e-06	0.000181572
PNLIPP1	0.983598	4.57e-06	0.000181572
HMGB3P2	0.563874	4.57132e-06	0.000181572
ENSG00000290729	0.832134	4.58262e-06	0.000181722
RPS3AP28	0.642479	4.59428e-06	0.000181722
RPL11P1	0.690185	4.59576e-06	0.000181722
RPS4XP14	0.530026	4.59985e-06	0.000181722
RAD17P2	0.706954	4.61596e-06	0.000181957
ALOX15P2	0.499191	4.61929e-06	0.000181957
TFDP1P3	0.414175	4.62441e-06	0.000181957
KIF3AP1	0.795079	4.63221e-06	0.00018202
ENSG00000213150	0.704407	4.63983e-06	0.000182076
ENSG00000251313	0.528537	4.65994e-06	0.000182458
CCSER2P1	0.721508	4.662e-06	0.000182458
ICE2P1	0.457993	4.67129e-06	0.000182578
ENSG00000257872	0.425177	4.68984e-06	0.000182962
RPL13AP26	0.949082	4.69526e-06	0.000182962
TIPINP2	0.492619	4.7049e-06	0.000182962
RPL32P13	0.532886	4.7093e-06	0.000182962
ENSG00000244535	0.645757	4.71228e-06	0.000182962
ENSG00000253966	0.617613	4.72958e-06	0.000183211
ENSG00000159239	0.850844	4.73499e-06	0.000183211
ENSG00000258081	0.999507	4.74324e-06	0.000183211
ENSG00000279217	0.8958	4.74399e-06	0.000183211
ACTG1P3	0.573051	4.7507e-06	0.000183211
ENSG00000242880	1.23595	4.75614e-06	0.000183211
HNRNPA1P13	0.484766	4.77278e-06	0.000183574
XIAPP2	0.732048	4.77807e-06	0.000183574
TFDP1P1	0.440321	4.78596e-06	0.000183612
ENSG00000258204	0.353314	4.79651e-06	0.000183612
HMGN2P39	0.678842	4.79781e-06	0.000183612
RPL35AP21	0.64294	4.82708e-06	0.000184485
NUDT19P6	0.811333	4.83319e-06	0.000184485
PCAT1	0.730329	4.84288e-06	0.000184614
ENSG00000225711	0.780063	4.86389e-06	0.000185175
RPL35AP33	0.642134	4.91116e-06	0.000186582
ENSG00000233820	0.390753	4.91461e-06	0.000186582
VEZTP1	0.536155	4.91991e-06	0.000186582
ENSG00000257611	0.457484	4.94155e-06	0.00018716
APOOP2	0.715419	4.97453e-06	0.00018813
ENSG00000283399	0.534678	4.97996e-06	0.00018813
DPPA3P5	0.679197	4.98752e-06	0.000188173
PPIAP28	0.623831	4.99622e-06	0.00018826
RPL21P10	0.468793	5.02676e-06	0.000188835
RPL21P13	0.477448	5.02709e-06	0.000188835
ENSG00000228367	0.530571	5.04413e-06	0.000188835
RPL37P15	0.640935	5.06287e-06	0.000188835
RPL12P18	0.77585	5.06688e-06	0.000188835
RPL17P25	0.468322	5.06925e-06	0.000188835
ENSG00000250189	1.30968	5.06992e-06	0.000188835
KRT125P	0.661422	5.08162e-06	0.000188835
SLC25A25-AS1	0.858361	5.08575e-06	0.000188835
LINC01902	0.845159	5.09176e-06	0.000188835
MATR3P3	0.419919	5.10304e-06	0.000188835
DDX19A	0.323639	5.1064e-06	0.000188835
LINC01359	0.961201	5.11156e-06	0.000188835
ENSG00000256748	0.55456	5.11289e-06	0.000188835
KRT8P12	0.430837	5.11394e-06	0.000188835
EIF3JP2	0.740759	5.11629e-06	0.000188835
ENSG00000270850	0.778638	5.12087e-06	0.000188835
CCDC137P1	0.674051	5.1285e-06	0.000188879
LINC01447	0.824773	5.22654e-06	0.000191985
ENSG00000286125	0.74757	5.23456e-06	0.000191985
EEF1A1P35	0.442162	5.23907e-06	0.000191985
FYTTD1P1	0.732094	5.24333e-06	0.000191985
RPS3AP32	0.746969	5.25385e-06	0.000191985
SNX6P1	0.641538	5.25451e-06	0.000191985
EFHD2-AS1	0.919434	5.26409e-06	0.000191985
ENSG00000227034	0.679154	5.26996e-06	0.000191985
RASSF8-AS1	0.862555	5.27169e-06	0.000191985
SPATA12	-0.330348	5.29273e-06	0.000192513
ENSG00000241179	0.676281	5.30701e-06	0.000192793
PKHD1	-0.119679	5.32823e-06	0.000193325
ENSG00000279110	0.81701	5.34614e-06	0.000193735
HSPE1P2	0.45938	5.35344e-06	0.000193739
EEDP1	0.64033	5.35945e-06	0.000193739
ENSG00000215567	0.474577	5.38357e-06	0.000194371
RPS3AP41	0.584237	5.39107e-06	0.000194403
BTF3P13	0.520894	5.42402e-06	0.000195351
SSBL3P	0.674021	5.43141e-06	0.000195378
HNRNPA1P16	0.422414	5.4386e-06	0.000195397
NPM1P45	0.652336	5.45311e-06	0.000195549
RPS24P17	0.699197	5.46104e-06	0.000195549
ARPC3P5	0.413081	5.46283e-06	0.000195549
ZNF652P1	0.542165	5.47258e-06	0.000195627
ENSG00000291214	0.953729	5.47833e-06	0.000195627
ENSG00000230331	0.895495	5.51257e-06	0.000196611
RPL39P39	0.520041	5.56213e-06	0.000198137
NPM1P1	0.757764	5.57387e-06	0.000198315
ENSG00000214890	0.515497	5.60429e-06	0.000199156
TOP1P1	0.301535	5.62275e-06	0.00019957
RAB9BP1	0.787893	5.63953e-06	0.000199924
RPL7L1P13	0.596903	5.67513e-06	0.000200943
ENSG00000244266	0.719534	5.71027e-06	0.000201944
RPL7P27	0.577141	5.72168e-06	0.000202104
RPS3AP44	0.46949	5.73818e-06	0.000202207
RPSAP57	0.687736	5.73836e-06	0.000202207
GEMIN2P2	0.440516	5.81234e-06	0.000204568
EIF2S2P2	0.605118	5.82697e-06	0.000204678
NDUFB4P1	0.697882	5.82941e-06	0.000204678
SLC25A51P2	0.34216	5.85862e-06	0.000205458
ENSG00000264289	0.870485	5.88383e-06	0.000206035
CNTNAP2	-0.121522	5.88911e-06	0.000206035
RPL21P50	0.810948	5.89681e-06	0.000206055
ENSG00000270631	0.841491	5.90375e-06	0.000206055
NFIA	0.211473	5.92161e-06	0.000206434
BLZF2P	0.625784	5.94652e-06	0.00020704
CYCSP1	0.788075	5.95312e-06	0.00020704
ENSG00000254406	0.406281	5.96068e-06	0.000207058
RPL17P17	0.68893	5.97497e-06	0.000207309
LINC02109	0.902389	6.00307e-06	0.000208038
ST13P20	0.500597	6.01536e-06	0.000208187
ENSG00000225055	0.435916	6.02156e-06	0.000208187
RPL21P82	0.458659	6.03836e-06	0.000208517
ENSG00000257060	0.852142	6.04685e-06	0.000208517
LINC00964	0.778193	6.06477e-06	0.000208517
ENSG00000270442	0.639919	6.07936e-06	0.000208517
RPS4XP10	0.544975	6.0877e-06	0.000208517
LINC-PINT	0.774521	6.08948e-06	0.000208517
ENSG00000226622	0.863015	6.09244e-06	0.000208517
ENSG00000257848	0.874094	6.09512e-06	0.000208517
ENSG00000226405	0.736594	6.10035e-06	0.000208517
RPL17P40	0.91977	6.10221e-06	0.000208517
MYL6P3	0.670358	6.11319e-06	0.000208517
ARGFXP1	0.437601	6.11636e-06	0.000208517
HMGN1P11	0.817399	6.14394e-06	0.000209093
MSS51	-0.238564	6.1492e-06	0.000209093
BCDIN3D-AS1	0.862001	6.1546e-06	0.000209093
RPS10P9	0.523653	6.17492e-06	0.000209512
RPL35AP28	0.61552	6.18123e-06	0.000209512
ENSG00000215297	0.737606	6.19508e-06	0.000209731
JAG1	-0.197431	6.20197e-06	0.000209731
ENSG00000215237	0.547034	6.24984e-06	0.000210682
USP21P1	0.578101	6.2528e-06	0.000210682
ENSG00000253553	0.858872	6.25851e-06	0.000210682
SNHG14	0.443772	6.25914e-06	0.000210682
ENSG00000235251	0.427571	6.26598e-06	0.000210682
RNF138P1	0.391386	6.27714e-06	0.000210816
MAILR	0.823253	6.29056e-06	0.000210845
DDX18P1	0.540706	6.29237e-06	0.000210845
NAPA-AS1	0.882105	6.31534e-06	0.000211373
ENSG00000291100	0.544065	6.32373e-06	0.000211413
SLC25A3P2	0.386661	6.3466e-06	0.000211831
NCF2	-0.249944	6.35066e-06	0.000211831
NIFKP2	0.654783	6.37292e-06	0.000212332
SEC22B	0.40284	6.38085e-06	0.000212355
ENSG00000213365	0.462196	6.39494e-06	0.000212506
ENSG00000236674	0.602795	6.41361e-06	0.000212506
RPL21P99	0.794574	6.41364e-06	0.000212506
NRP2	-0.217109	6.41434e-06	0.000212506
ELAC2	-0.207243	6.42425e-06	0.000212594
STMP1	0.349658	6.47263e-06	0.000213954
RPL7AP55	0.470468	6.48162e-06	0.00021401
ZNF567-DT	1.01634	6.54657e-06	0.000215912
ENSG00000287271	1.18662	6.56064e-06	0.000215995
RPL35AP19	0.565353	6.56381e-06	0.000215995
RPL30P3	0.687685	6.57941e-06	0.000216184
RPL35AP13	0.971043	6.5878e-06	0.000216184
RPL21P106	0.690476	6.59179e-06	0.000216184
MRE11P1	0.424899	6.61062e-06	0.000216184
ENSG00000285633	1.03176	6.61751e-06	0.000216184
RDXP3	0.393758	6.61789e-06	0.000216184
GOT2P3	0.39705	6.63719e-06	0.000216184
MKRN8P	0.385246	6.63736e-06	0.000216184
RPL7L1P18	0.49776	6.63828e-06	0.000216184
RPL7P10	0.486827	6.6432e-06	0.000216184
ENSG00000228154	0.555307	6.72429e-06	0.000218363
ENSG00000214883	0.544969	6.72503e-06	0.000218363
ENSG00000244086	0.573719	6.73363e-06	0.0002184
ENSG00000258627	0.701874	6.75917e-06	0.000218821
FDPSP3	0.664733	6.76151e-06	0.000218821
CTBP2P2	0.821907	6.77885e-06	0.000219116
XACT	0.867802	6.78556e-06	0.000219116
DEPDC1P2	0.508768	6.81057e-06	0.000219404
ACTG1P9	0.45021	6.81661e-06	0.000219404
ENSG00000203262	0.672121	6.81979e-06	0.000219404
SAGE2P	0.641138	6.82438e-06	0.000219404
RPS3AP47	0.294642	6.84439e-06	0.000219748
TRMT10BP1	0.716177	6.85006e-06	0.000219748
TPM3P2	0.439753	6.87509e-06	0.000219863
HMGB1P40	0.570597	6.87946e-06	0.000219863
HSPA8P4	0.646729	6.88054e-06	0.000219863
KRT8P29	0.50191	6.88358e-06	0.000219863
RPS4XP9	0.682623	6.89449e-06	0.000219972
Y_RNA	0.743879	6.91047e-06	0.000220242
KDR	-0.108669	6.95263e-06	0.000221211
CTNNBL1P1	0.463868	6.9572e-06	0.000221211
ENSG00000258619	0.758419	6.96346e-06	0.000221211
ENSG00000232042	0.80557	6.97515e-06	0.000221221
ENSG00000241251	0.45447	6.97886e-06	0.000221221
CCT4P1	0.622007	6.99091e-06	0.000221364
RPL7P7	0.492135	7.00149e-06	0.00022146
ENSG00000233455	0.709039	7.02567e-06	0.000221985
ENSG00000254595	0.664919	7.04678e-06	0.000222185
HNRNPDP1	0.625018	7.04712e-06	0.000222185
ENSG00000263682	0.9061	7.05835e-06	0.0002223
HSD3BP2	0.344751	7.08809e-06	0.000222398
RPS3AP39	0.518565	7.0887e-06	0.000222398
SPOPLP2	0.714567	7.09e-06	0.000222398
AMZ2P2	0.624696	7.09175e-06	0.000222398
SETP1	0.635953	7.10301e-06	0.000222513
ENSG00000256176	0.619563	7.14906e-06	0.000223717
ENSG00000251680	0.746143	7.15733e-06	0.000223737
ZNF451-AS1	0.920352	7.16827e-06	0.000223841
TBC1D3P6	0.490993	7.20172e-06	0.000224646
RPA3P1	0.60217	7.25394e-06	0.000226035
ENSG00000228010	0.89822	7.26921e-06	0.000226271
RPL5P17	0.518482	7.28994e-06	0.000226441
ENSG00000269945	0.878995	7.2901e-06	0.000226441
SRSF3P2	0.829466	7.31616e-06	0.000226811
ENSG00000235817	0.909124	7.3175e-06	0.000226811
ZNF316	0.780129	7.33921e-06	0.000226883
HNF1A-AS1	0.875487	7.34763e-06	0.000226883
ANKRD34C-AS1	0.775628	7.3536e-06	0.000226883
ZNF622P1	0.961573	7.35428e-06	0.000226883
EI24P3	0.462585	7.35844e-06	0.000226883
ENSG00000249006	0.511895	7.43274e-06	0.000228631
ENSG00000229594	0.578338	7.43596e-06	0.000228631
ENSG00000290827	0.913693	7.44841e-06	0.000228631
RPL21P12	0.502294	7.45039e-06	0.000228631
HNRNPA1P76	0.517023	7.46907e-06	0.000228631
SETP3	0.480524	7.46935e-06	0.000228631
PM20D1-AS1	0.442047	7.47719e-06	0.000228631
RPS3AP50	0.75752	7.47745e-06	0.000228631
CIR1P1	0.595546	7.49655e-06	0.000228976
ENSG00000284430	0.942443	7.52619e-06	0.000229643
TTC39CP1	0.560625	7.54632e-06	0.000229995
ENSG00000258796	0.723607	7.55342e-06	0.000229995
HSPE1P8	0.527869	7.5775e-06	0.000230489
VTI1BP2	0.436736	7.59447e-06	0.000230767
ENSG00000290695	0.868826	7.62256e-06	0.000231094
KRT8P6	0.551874	7.62626e-06	0.000231094
MTHFD2P7	0.400023	7.62965e-06	0.000231094
PRAMEF14	-0.338146	7.63673e-06	0.000231094
CSRP2P2	0.478532	7.64534e-06	0.000231116
IRGQ	0.458029	7.65591e-06	0.000231197
CRTAP	-0.192109	7.67618e-06	0.000231249
RPS23P2	0.780194	7.68135e-06	0.000231249
OLA1P2	0.474503	7.6827e-06	0.000231249
ENSG00000267383	0.627835	7.68912e-06	0.000231249
ENSG00000280395	1.07461	7.69711e-06	0.000231252
DNAJB6P2	0.686802	7.70868e-06	0.000231363
MINDY2-DT	0.693235	7.73263e-06	0.000231845
YAP1P2	0.511851	7.77544e-06	0.00023289
ENSG00000250523	0.638082	7.79539e-06	0.00023325
SEPTIN10P1	0.310214	7.86133e-06	0.00023496
WBP11P2	0.568971	7.86855e-06	0.00023496
ABHD12	-0.186659	7.88457e-06	0.000235199
ENSG00000253238	1.01866	7.91009e-06	0.000235453
HSPA8P9	0.386755	7.91743e-06	0.000235453
MKS1	-0.251814	7.92439e-06	0.000235453
RPL7AP48	0.648642	7.92627e-06	0.000235453
NUCKS1P1	0.701902	7.93321e-06	0.000235453
LERFS	0.756943	7.94903e-06	0.000235685
LINC00963	0.799283	7.9612e-06	0.000235807
EXOSC3P2	0.532963	8.0507e-06	0.000238218
AKR1B1P4	0.403407	8.1137e-06	0.00023984
ITCH	0.608227	8.13027e-06	0.000240088
CYLD-AS1	0.54753	8.14011e-06	0.000240137
IPO8P1	0.463534	8.17109e-06	0.000240809
NPM1P4	0.683614	8.2334e-06	0.000242189
ENSG00000243705	0.668681	8.23441e-06	0.000242189
ENSG00000239415	0.959264	8.25278e-06	0.000242389
RPL7AP36	0.490329	8.26098e-06	0.000242389
PRKAR1AP1	0.558266	8.26599e-06	0.000242389
RPL21P113	0.943938	8.28719e-06	0.000242768
RPL21P15	0.506817	8.30508e-06	0.000242815
BMP6P1	0.588469	8.30533e-06	0.000242815
EXOSC6	0.65005	8.31494e-06	0.000242854
ENSG00000287041	0.858187	8.34439e-06	0.000243396
LINC01004	1.05826	8.36805e-06	0.000243396
ENSG00000236814	0.262503	8.37522e-06	0.000243396
ENSG00000240291	0.601534	8.3767e-06	0.000243396
HSPD1P6	0.390482	8.38319e-06	0.000243396
PAICSP2	0.651056	8.39494e-06	0.000243396
PMM2P1	0.671375	8.39758e-06	0.000243396
ENSG00000240311	0.522984	8.40499e-06	0.000243396
RPS27AP18	0.706758	8.40813e-06	0.000243396
TNPO1P3	0.269498	8.42643e-06	0.000243686
FTX	0.617903	8.44741e-06	0.000244052
ENSG00000234352	0.608463	8.47414e-06	0.000244584
ENSG00000259950	0.533304	8.48613e-06	0.000244689
RPL13P6	0.747228	8.50259e-06	0.000244893
HK1	-0.210183	8.50991e-06	0.000244893
PPP4R2P3	0.509068	8.53858e-06	0.000245393
GNL2P1	0.558358	8.54397e-06	0.000245393
SLC2A3P4	0.3689	8.56175e-06	0.000245596
IGHV3-6	0.363685	8.57399e-06	0.000245596
RPL23AP35	0.462837	8.57614e-06	0.000245596
TEK	-0.155466	8.59618e-06	0.000245929
PPIAP38	0.551484	8.62015e-06	0.000246375
ENSG00000255511	0.654886	8.65378e-06	0.000247096
CDC27P3	0.471844	8.70971e-06	0.000248451
KRT18P48	0.39827	8.73936e-06	0.000248925
ENSG00000233708	0.459928	8.7517e-06	0.000248925
KRT8P39	0.356661	8.75175e-06	0.000248925
RPS24P6	0.588974	8.78864e-06	0.000249732
ENSG00000279134	0.967692	8.80467e-06	0.000249945
RPL36AP36	0.501238	8.81709e-06	0.000250056
RPL39P17	0.620489	8.82768e-06	0.000250115
ENSG00000270682	0.742734	8.8519e-06	0.000250559
FABP5P8	0.478671	8.91155e-06	0.000252005
ENSG00000253636	0.963982	8.92528e-06	0.00025215
SILC1	0.830306	8.94721e-06	0.000252504
SSX19P	0.384824	8.955e-06	0.000252504
LINC01499	1.07003	8.9817e-06	0.000253013
ENSG00000244756	0.60821	9.00449e-06	0.000253256
LINC01422	0.788798	9.00757e-06	0.000253256
KRT18P18	0.368847	9.01965e-06	0.000253353
GARS1-DT	0.746321	9.03212e-06	0.000253461
HNRNPA1P40	0.364954	9.04209e-06	0.000253498
IFT57P1	0.875083	9.06978e-06	0.000254032
ARL2BPP4	0.769405	9.1159e-06	0.00025508
RPL36AP40	0.475526	9.13785e-06	0.000255451
AIMP1P1	0.618402	9.25153e-06	0.000258383
MT-CO3	2.51772	9.26613e-06	0.000258544
SLC25A15P2	0.408563	9.28328e-06	0.000258564
ENSG00000234937	0.741139	9.29791e-06	0.000258564
KRT8P28	0.635119	9.30812e-06	0.000258564
AKR1C6P	0.510276	9.30982e-06	0.000258564
IGBP1P5	0.441482	9.31668e-06	0.000258564
ENSG00000224280	0.356627	9.3197e-06	0.000258564
ENSG00000232611	0.931309	9.33657e-06	0.000258778
ENSG00000235390	0.581952	9.35224e-06	0.000258778
RSL24D1P6	0.677849	9.3587e-06	0.000258778
ENSG00000270304	0.663032	9.36812e-06	0.000258778
ENOPH1P1	0.62314	9.38556e-06	0.000258778
HMGN1P35	0.591542	9.39411e-06	0.000258778
ENSG00000278920	0.860355	9.39826e-06	0.000258778
ENSG00000240975	0.81349	9.39916e-06	0.000258778
ENSG00000260710	0.938071	9.40673e-06	0.000258778
TRBV21-1	0.73498	9.43074e-06	0.000258965
ISL1	-0.178059	9.43473e-06	0.000258965
RPS4XP11	0.409094	9.44258e-06	0.000258965
RPL31P10	0.372648	9.44882e-06	0.000258965
RPS3AP53	0.488711	9.52085e-06	0.000260658
ENSG00000234750	0.453948	9.52837e-06	0.000260658
LINC02987	0.872549	9.54338e-06	0.000260818
RPSAP40	0.549315	9.55199e-06	0.000260818
TMEM236	-0.149397	9.56204e-06	0.00026085
ITGA9	-0.206933	9.62956e-06	0.000262448
ENSG00000255463	0.640959	9.64575e-06	0.000262645
SELENOKP1	0.665224	9.6937e-06	0.000263509
NFYCP2	0.409898	9.6992e-06	0.000263509
EXOGP1	0.69663	9.70498e-06	0.000263509
GPN3P1	0.709874	9.71337e-06	0.000263509
NPM1P33	0.521028	9.73186e-06	0.000263767
RPL3P5	0.500682	9.77093e-06	0.000264329
RPSAP21	0.305609	9.77839e-06	0.000264329
ENSG00000249541	0.363047	9.77962e-06	0.000264329
FAM133EP	0.700434	9.79961e-06	0.000264513
COX20P2	0.756467	9.80446e-06	0.000264513
ENSG00000257604	0.48037	9.86322e-06	0.000265821
TEX41	0.739436	9.87105e-06	0.000265821
DNAJA1P5	0.797267	9.88519e-06	0.000265958
UQCRHP3	0.528647	9.92065e-06	0.000266474
FARSBP1	0.664509	9.92254e-06	0.000266474
LINC02080	0.937311	1.00224e-05	0.00026891
MAPRE1P1	0.48304	1.00426e-05	0.000269207
LINC01285	0.729323	1.00673e-05	0.000269589
MRPS25	0.402802	1.00753e-05	0.000269589
HSD17B7P1	0.423192	1.00894e-05	0.000269661
RPL9P31	0.730151	1.01032e-05	0.000269661
LARP1BP1	0.539308	1.01055e-05	0.000269661
HNRNPA1P36	0.412823	1.01265e-05	0.000269974
ENSG00000254973	0.757991	1.01378e-05	0.000270033
NANOGP9	0.409989	1.01511e-05	0.00027014
EEF1A1P28	0.61963	1.01995e-05	0.000270949
SLC33A1	0.562787	1.01999e-05	0.000270949
ENSG00000230926	0.679143	1.02763e-05	0.000272732
RPS3AP14	0.595888	1.02968e-05	0.000273028
RPL21P110	0.534078	1.03272e-05	0.000273588
PTTG2	0.280427	1.03672e-05	0.000274373
ENSG00000226552	0.587821	1.03756e-05	0.000274373
FAM230I	0.380332	1.03928e-05	0.000274382
IPCEF1	0.462589	1.03946e-05	0.000274382
ETF1P2	0.476489	1.04096e-05	0.000274532
DEFB108F	0.454449	1.04199e-05	0.000274555
RANP8	0.620073	1.04302e-05	0.00027458
RPL36AP33	0.82617	1.04407e-05	0.000274611
PSMD12P1	0.436728	1.04577e-05	0.000274813
MAPK6P6	0.510822	1.04714e-05	0.000274927
MIR646HG	0.827195	1.04873e-05	0.000275098
NFIA-AS2	0.842789	1.05284e-05	0.000275747
NIP7P2	0.460087	1.05406e-05	0.000275747
SEPHS1P7	0.700836	1.05423e-05	0.000275747
PPIAP19	0.424016	1.05497e-05	0.000275747
ENSG00000285280	0.930506	1.05801e-05	0.00027622
PTOV1P1	0.462746	1.05884e-05	0.00027622
AGKP2	0.397369	1.0596e-05	0.00027622
DNAJC8P4	0.637795	1.06192e-05	0.000276486
ENSG00000237115	0.465308	1.0625e-05	0.000276486
RPL21P129	0.440932	1.07044e-05	0.000278089
ENSG00000237936	0.804512	1.07056e-05	0.000278089
KRT19P3	0.489977	1.07219e-05	0.000278267
RAC1P5	0.458175	1.07459e-05	0.000278503
RPL24P8	0.411908	1.075e-05	0.000278503
OLMALINC	0.825436	1.07751e-05	0.000278638
COX7A2P2	0.731626	1.07814e-05	0.000278638
NPM1P13	0.720727	1.07836e-05	0.000278638
MPPE1P1	0.538095	1.07986e-05	0.000278683
BDP1P	0.619733	1.08044e-05	0.000278683
RPS4XP7	0.415287	1.08188e-05	0.00027881
ENSG00000284722	0.749616	1.0842e-05	0.000279162
KRT18P4	0.39784	1.08834e-05	0.000279845
ENSG00000250084	0.539512	1.08879e-05	0.000279845
ENSG00000229032	0.404676	1.08971e-05	0.000279845
RPL7P33	0.477414	1.09583e-05	0.00028117
NCK1-DT	1.04479	1.10329e-05	0.000282837
GPATCH11P1	0.460741	1.1046e-05	0.000282927
NDUFAF4P1	0.706353	1.10597e-05	0.000282975
NPM1P51	0.515974	1.10672e-05	0.000282975
EEF1B2P8	0.824774	1.10983e-05	0.000283294
MT-CYB	2.51702	1.1099e-05	0.000283294
EPIC1	0.811532	1.11218e-05	0.000283615
RPL39P29	0.755869	1.11348e-05	0.000283615
ENSG00000226166	0.521687	1.11448e-05	0.000283615
ENSG00000243234	0.586151	1.11502e-05	0.000283615
NPM1P8	0.516025	1.11891e-05	0.000284331
TRNT1P1	0.775882	1.12027e-05	0.000284331
ENSG00000289092	0.94915	1.12156e-05	0.000284331
MT-ND6	2.5965	1.12171e-05	0.000284331
ENSG00000213331	0.474645	1.12422e-05	0.000284721
RPL5P4	0.498541	1.12562e-05	0.000284758
FLG	-0.218576	1.12846e-05	0.000284758
ENSG00000257298	1.04009	1.12876e-05	0.000284758
ENSG00000217776	0.581254	1.12882e-05	0.000284758
OR51D1	-0.355377	1.12947e-05	0.000284758
ZNF213-AS1	0.457298	1.13076e-05	0.000284758
RBBP4P1	0.337436	1.13212e-05	0.000284758
H2BC7	0.719807	1.13219e-05	0.000284758
ENSG00000274979	1.13658	1.13309e-05	0.000284758
ERCC6L2-AS1	0.840428	1.1345e-05	0.000284868
NPM1P34	0.534928	1.13768e-05	0.000285421
CDKN2B-AS1	0.771491	1.1402e-05	0.00028575
ENSG00000290928	0.756884	1.14154e-05	0.00028575
RPL11P3	0.5271	1.14191e-05	0.00028575
ENSG00000216809	0.910108	1.14629e-05	0.00028655
RPL7P18	0.643205	1.14706e-05	0.00028655
TINF2	-0.278745	1.14939e-05	0.000286614
LINC01287	0.886879	1.15018e-05	0.000286614
ZNF790-AS1	1.00357	1.15025e-05	0.000286614
MTRES1P1	0.62219	1.15643e-05	0.000287752
HAUS3	0.581151	1.15738e-05	0.000287752
RPL21P64	0.636351	1.15775e-05	0.000287752
ACTG1P15	0.455195	1.15916e-05	0.000287857
RPL5P30	0.417808	1.16458e-05	0.00028896
RPLP0P4	0.656966	1.1697e-05	0.000289984
ENSG00000240627	0.499866	1.17077e-05	0.000290005
ENSG00000266910	0.572003	1.17708e-05	0.000291265
MRPL35P2	0.51375	1.17784e-05	0.000291265
DNM1P38	0.527569	1.18157e-05	0.000291853
WDR82P2	0.452464	1.18221e-05	0.000291853
RPL7AP8	0.491464	1.18339e-05	0.000291899
ENSG00000225344	0.414226	1.18692e-05	0.000292169
RPL21P117	0.415256	1.18731e-05	0.000292169
FGF7P1	0.545154	1.1881e-05	0.000292169
ENSG00000248586	0.485595	1.18847e-05	0.000292169
RPSAP24	0.46451	1.19028e-05	0.000292221
MAD2L1P1	0.346055	1.19137e-05	0.000292221
SEPTIN7P10	0.686691	1.1918e-05	0.000292221
ENSG00000239323	0.474572	1.19276e-05	0.000292221
ENSG00000226040	0.378019	1.19439e-05	0.000292221
ENSG00000244113	0.67428	1.19465e-05	0.000292221
MAPT-AS1	0.819408	1.19663e-05	0.000292461
MRPL15P1	0.645232	1.19807e-05	0.000292511
LYSET	0.573046	1.19892e-05	0.000292511
RPL9P2	0.458882	1.19982e-05	0.000292511
ENSG00000270870	0.442281	1.20167e-05	0.000292718
HMGB3P10	0.717712	1.20529e-05	0.000293158
OR13C6P	0.558153	1.20547e-05	0.000293158
ENSG00000256533	0.727223	1.20967e-05	0.000293936
ZNF123P	0.608766	1.21424e-05	0.000294692
RPS7P15	0.671123	1.21483e-05	0.000294692
RPL34P1	0.596955	1.2158e-05	0.000294692
RPL17P15	0.639176	1.21684e-05	0.000294702
ENSG00000249689	0.731645	1.2205e-05	0.000295279
FAM120AOS	0.334225	1.22123e-05	0.000295279
RPL7P52	0.548022	1.22279e-05	0.0002953
HSP90AA5P	0.522354	1.22414e-05	0.0002953
RPL31P18	0.646867	1.22434e-05	0.0002953
ENSG00000229347	0.626684	1.22549e-05	0.000295336
RPL34P3	0.835141	1.2271e-05	0.000295426
HSP90AA4P	0.558829	1.22788e-05	0.000295426
ENSG00000279759	0.896934	1.22966e-05	0.000295613
PSIP1P1	0.381998	1.23114e-05	0.000295724
ENSG00000254957	0.547047	1.235e-05	0.000295964
HSPA5P1	0.369599	1.23578e-05	0.000295964
ENSG00000253183	0.528026	1.23802e-05	0.000295964
AHCYP3	0.548257	1.23839e-05	0.000295964
ASS1P4	0.367614	1.23856e-05	0.000295964
NPM1P3	0.646235	1.2411e-05	0.000295964
RAC1P3	0.810329	1.24227e-05	0.000295964
RPL7P48	0.509199	1.24238e-05	0.000295964
ENSG00000253894	0.855781	1.2431e-05	0.000295964
MT-ND1	2.58209	1.24438e-05	0.000295964
HSP90AA3P	0.44403	1.24516e-05	0.000295964
CHORDC2P	0.40745	1.2453e-05	0.000295964
RPL21P90	0.501341	1.24622e-05	0.000295964
RPS7P5	0.837704	1.24625e-05	0.000295964
HSPE1P7	0.538675	1.24855e-05	0.00029613
ENSG00000288720	0.827832	1.24904e-05	0.00029613
MAP2K1P1	0.334547	1.25079e-05	0.00029613
EIF4A1P7	0.423065	1.25098e-05	0.00029613
ENSG00000228392	0.99028	1.2573e-05	0.000297273
ENSG00000218857	0.442403	1.25784e-05	0.000297273
TSIX	0.77919	1.25994e-05	0.00029753
NMNAT1P1	0.595946	1.26197e-05	0.000297769
PPIAP80	0.403631	1.26347e-05	0.000297835
PDP1	-0.236494	1.26427e-05	0.000297835
ENSG00000284747	0.862352	1.26778e-05	0.00029842
OR2T4	-0.332354	1.27069e-05	0.000298795
RDM1P3	0.684122	1.2714e-05	0.000298795
CEMIP	-0.250173	1.27359e-05	0.00029907
TLK1P1	0.478068	1.27735e-05	0.000299512
PPP4R2P2	0.550609	1.27882e-05	0.000299512
SRP72P1	0.466401	1.27927e-05	0.000299512
LINC00882	0.800524	1.27957e-05	0.000299512
GCNT1P2	0.712172	1.28057e-05	0.000299512
FABP5P9	0.432152	1.2824e-05	0.0002997
HMGB1P14	0.661831	1.28565e-05	0.000299839
ENSG00000215380	0.437291	1.28644e-05	0.000299839
CT47C1	0.490196	1.28658e-05	0.000299839
ENSG00000261232	0.602834	1.28708e-05	0.000299839
ENSG00000217477	0.607028	1.28993e-05	0.000300215
RPSAP72	0.757366	1.29084e-05	0.000300215
ENSG00000244076	0.535053	1.29176e-05	0.000300215
MYO5BP2	0.449063	1.29326e-05	0.000300325
HMGB1P21	0.68265	1.29604e-05	0.000300733
TPT1P9	0.477297	1.2981e-05	0.000300845
DHFRP5	0.816185	1.29857e-05	0.000300845
SH3TC2	-0.197449	1.30197e-05	0.000301395
DDX10P2	0.366399	1.30328e-05	0.00030145
EEF1A1P45	0.73189	1.30427e-05	0.00030145
ENSG00000271560	0.607809	1.30608e-05	0.000301631
EEF1A1P30	0.662462	1.30773e-05	0.000301775
POLR3A	-0.138642	1.31476e-05	0.000302934
ENSG00000272754	0.913269	1.3152e-05	0.000302934
MRM3P2	0.554949	1.31659e-05	0.000302934
RPS27P4	0.677115	1.31688e-05	0.000302934
NDUFA10	-0.160847	1.31818e-05	0.000302953
ENSG00000286671	0.79977	1.31956e-05	0.000302953
KRT18P9	0.471868	1.32006e-05	0.000302953
ENSG00000260293	0.854535	1.32194e-05	0.000303148
RDXP1	0.493748	1.32684e-05	0.000304034
ENSG00000255391	0.727524	1.33209e-05	0.000304999
ENSG00000268884	0.593516	1.3355e-05	0.00030554
ENSG00000270490	0.720083	1.33835e-05	0.000305954
RPL7P60	0.544638	1.34813e-05	0.00030795
HMGN1P1	0.921607	1.35374e-05	0.000308991
RPL13AP2	0.405059	1.36149e-05	0.000310519
SIAE	-0.179404	1.36433e-05	0.000310832
PRXL2CP1	0.485534	1.36581e-05	0.000310832
KRT18P38	0.299018	1.367e-05	0.000310832
DNAAF10	0.590311	1.36819e-05	0.000310832
ENSG00000259477	0.596021	1.37109e-05	0.000310832
ENSG00000251647	0.718354	1.37149e-05	0.000310832
DUXAP6	0.670266	1.3715e-05	0.000310832
EEF1A1P2	0.70398	1.37152e-05	0.000310832
LINC00513	0.874802	1.37239e-05	0.000310832
ENSG00000258702	0.928117	1.37482e-05	0.00031094
ANXA2R-OT1	0.95422	1.37648e-05	0.00031094
TSHR	-0.113439	1.37653e-05	0.00031094
ARHGEF26-AS1	0.945971	1.37769e-05	0.00031094
HNRNPH1P2	0.511767	1.37868e-05	0.00031094
AHCYP7	0.417893	1.37923e-05	0.00031094
CALM1P1	0.559291	1.38154e-05	0.000311204
ENSG00000280383	0.805347	1.38476e-05	0.000311204
ENSG00000259921	0.944234	1.38786e-05	0.000311204
SVIL-AS1	0.404843	1.38946e-05	0.000311204
TMPOP1	0.591543	1.3897e-05	0.000311204
PPATP1	0.280502	1.39032e-05	0.000311204
RPL18AP16	0.764772	1.39062e-05	0.000311204
NBPF21P	0.537995	1.39108e-05	0.000311204
CASP1P1	0.6893	1.39136e-05	0.000311204
LINC02436	1.0252	1.39193e-05	0.000311204
HINT1P1	0.626315	1.39206e-05	0.000311204
MKLN1-AS	0.878379	1.39413e-05	0.000311327
ASS1P14	0.352917	1.39473e-05	0.000311327
RPS4XP22	0.483899	1.39691e-05	0.000311577
ENSG00000257954	0.537018	1.39986e-05	0.000311997
RPS3A	0.262166	1.4057e-05	0.000313062
ENSG00000248196	0.561299	1.40685e-05	0.00031308
HNRNPA1P38	0.445473	1.409e-05	0.000313178
ENSG00000276960	0.549717	1.40961e-05	0.000313178
MMADHCP2	0.471654	1.41049e-05	0.000313178
LINC01572	0.832594	1.41656e-05	0.000314287
ENSG00000229497	0.402767	1.42006e-05	0.000314808
PGBD4P8	0.611334	1.42199e-05	0.000314808
OR4C2P	0.465164	1.42359e-05	0.000314808
FTH1P13	0.398873	1.42471e-05	0.000314808
PSMC1P4	0.421849	1.42478e-05	0.000314808
ENSG00000242295	0.485082	1.42534e-05	0.000314808
ENSG00000260664	0.773062	1.42765e-05	0.000315067
ASNSP1	0.589143	1.42866e-05	0.000315067
ENSG00000246130	0.515342	1.43668e-05	0.00031654
NFATC2IP-AS1	0.878211	1.43749e-05	0.00031654
EIF4A1P6	0.489946	1.44015e-05	0.000316871
ENSG00000228132	0.595904	1.44115e-05	0.000316871
RPL12P26	0.593129	1.45021e-05	0.000318623
KRT18P44	0.397802	1.4524e-05	0.000318866
PRKCH-AS1	0.869775	1.45386e-05	0.000318946
ENSG00000275833	0.532531	1.46157e-05	0.000320224
SNX5P2	0.423146	1.46186e-05	0.000320224
BTF3P5	0.461121	1.46359e-05	0.000320363
RNF13P1	0.441204	1.46568e-05	0.000320449
LINC01485	0.959103	1.46773e-05	0.000320449
FIRRE	0.705164	1.46903e-05	0.000320449
ENSG00000273748	0.655543	1.47009e-05	0.000320449
ENSG00000235226	0.672091	1.47027e-05	0.000320449
IFIT1P1	0.632393	1.47053e-05	0.000320449
ENSG00000218472	0.727183	1.47576e-05	0.000321145
ENSG00000213068	0.380227	1.47612e-05	0.000321145
SSBL4P	0.614576	1.47701e-05	0.000321145
ENSG00000237016	0.702776	1.48037e-05	0.00032145
RHCE	-0.254733	1.4806e-05	0.00032145
GALNT7-DT	1.01769	1.48568e-05	0.000322315
ENSG00000250080	0.46953	1.48794e-05	0.000322383
ENSG00000249738	0.81193	1.48819e-05	0.000322383
ENSG00000259677	1.07601	1.4913e-05	0.000322454
ENSG00000283128	0.584144	1.4921e-05	0.000322454
KRT18P63	0.377176	1.49229e-05	0.000322454
CCT5P1	0.365396	1.49292e-05	0.000322454
ENSG00000236754	0.651243	1.49973e-05	0.000323689
TPMTP1	0.396315	1.50123e-05	0.000323774
CAP2P1	0.552773	1.50618e-05	0.000324603
ENSG00000212989	0.817532	1.50841e-05	0.00032466
ENSG00000224012	0.596669	1.50866e-05	0.00032466
ENSG00000261208	0.523041	1.51065e-05	0.00032485
PCA3	0.72969	1.51219e-05	0.000324943
TVP23BP2	0.528374	1.51396e-05	0.00032505
RPL30	0.546243	1.5149e-05	0.00032505
PIGPP3	0.72909	1.51734e-05	0.000325199
CENPCP1	0.470054	1.51852e-05	0.000325199
ENSG00000214278	0.499774	1.51892e-05	0.000325199
ENSG00000236583	0.395657	1.52346e-05	0.000325922
RTCA-AS1	0.888694	1.52451e-05	0.000325922
RPL7AP10	0.547206	1.52953e-05	0.000326756
PPIAP77	0.335635	1.53121e-05	0.000326878
HSD3BP5	0.381806	1.53424e-05	0.000327159
OR2T2	-0.395589	1.53619e-05	0.000327159
ENSG00000259696	0.463814	1.53675e-05	0.000327159
FAM151B-DT	0.998255	1.53771e-05	0.000327159
SLC35E3	0.328912	1.53969e-05	0.000327159
INTS6-AS1	0.779677	1.54003e-05	0.000327159
ENSG00000267620	0.427452	1.54033e-05	0.000327159
ENSG00000279789	1.03177	1.54219e-05	0.000327316
IL6RP1	0.794577	1.5472e-05	0.000328143
PPP1R3B-DT	0.458847	1.5493e-05	0.000328351
RPL7P36	0.548016	1.55157e-05	0.000328529
ZEB2P1	0.382979	1.55238e-05	0.000328529
ENSG00000268105	0.584988	1.55485e-05	0.000328612
RGS17P1	0.62918	1.55501e-05	0.000328612
ENSG00000285979	1.11664	1.55691e-05	0.000328777
EEF1A1P16	0.4715	1.55843e-05	0.000328862
ARHGAP42P2	0.360663	1.55982e-05	0.000328919
ACTBP11	0.29946	1.56138e-05	0.00032901
RPL30P14	0.567476	1.56424e-05	0.000329377
ENSG00000259231	0.859623	1.56679e-05	0.000329676
HSPA8P7	0.450495	1.56934e-05	0.000329967
KIF9-AS1	0.513373	1.57135e-05	0.000329967
CD163L1	-0.173769	1.5723e-05	0.000329967
ZSCAN5DP	0.379215	1.57326e-05	0.000329967
ENSG00000265417	0.495213	1.57379e-05	0.000329967
OR4F28P	-0.479088	1.57592e-05	0.000330178
ENSG00000250333	1.01979	1.58e-05	0.000330797
RPS10P27	0.414147	1.58363e-05	0.00033123
EEF1A1P17	0.541432	1.58526e-05	0.00033123
ENSG00000268119	0.796446	1.58545e-05	0.00033123
LINC02861	1.00322	1.5877e-05	0.000331439
RPL4P1	0.516443	1.58932e-05	0.000331439
UBE2V1	0.423377	1.59034e-05	0.000331439
ENSG00000236230	0.965578	1.59097e-05	0.000331439
RPL5P15	0.56038	1.59233e-05	0.000331486
TUBAP12	0.514766	1.59412e-05	0.000331625
DPY19L4P2	0.587307	1.59615e-05	0.000331812
SC4MOP	0.913304	1.60085e-05	0.000332554
RPL36P5	0.572454	1.60417e-05	0.000332803
RPL15P19	0.763705	1.60493e-05	0.000332803
CES1P2	0.270432	1.60656e-05	0.000332803
HMGB1P8	0.454148	1.60659e-05	0.000332803
APOOP4	0.448282	1.60959e-05	0.000332943
RBM17P4	0.478328	1.61044e-05	0.000332943
NGRNP1	0.512542	1.61069e-05	0.000332943
RPS6P22	0.613318	1.61243e-05	0.000332943
VDAC3P1	0.422927	1.61294e-05	0.000332943
ENSG00000272356	0.775645	1.61616e-05	0.000333375
RPS20P12	0.615909	1.62039e-05	0.000334012
RPL31P26	0.622689	1.62214e-05	0.000334137
CTAGE13P	0.314081	1.62494e-05	0.000334457
ENSG00000242327	0.586884	1.62597e-05	0.000334457
APOOP1	0.749625	1.62902e-05	0.00033485
OR2AG2	-0.358061	1.63156e-05	0.00033499
ENSG00000237356	0.749629	1.63271e-05	0.00033499
ENSG00000213393	0.490448	1.63317e-05	0.00033499
ABCA4	-0.212843	1.63426e-05	0.00033499
RPL24P4	0.530091	1.64481e-05	0.000336917
ENSG00000225087	0.675393	1.65202e-05	0.000338157
MUC12	-0.307656	1.65418e-05	0.000338313
SALL4P2	0.505992	1.65565e-05	0.000338313
ENSG00000259099	0.311809	1.65624e-05	0.000338313
RPL7AP60	0.416327	1.65919e-05	0.00033868
ATP5PDP2	0.571206	1.66861e-05	0.000340102
AUP1	-0.293887	1.66961e-05	0.000340102
TPM3P1	0.328399	1.67032e-05	0.000340102
NDUFS5P5	0.526781	1.67079e-05	0.000340102
RPS15AP17	0.634959	1.67499e-05	0.000340721
NPL	-0.137458	1.68366e-05	0.000342203
ENSG00000259350	0.909236	1.68461e-05	0.000342203
UGT1A12P	0.433326	1.68666e-05	0.000342296
TPM3P7	0.386018	1.6874e-05	0.000342296
ENSG00000266479	0.729129	1.6952e-05	0.000343642
NAP1L1P1	0.476127	1.69733e-05	0.000343836
ENSG00000266184	0.389641	1.69904e-05	0.000343945
YWHABP2	0.496008	1.7039e-05	0.00034469
ENSG00000277498	0.803201	1.70738e-05	0.000345157
MIR518F	0.428716	1.71013e-05	0.000345206
FXNP1	0.5707	1.71087e-05	0.000345206
LINC02346	0.865373	1.71115e-05	0.000345206
RPL21P103	0.605159	1.7125e-05	0.000345241
MT-CO1	2.49252	1.71852e-05	0.000346209
LRRC2P1	0.556926	1.71966e-05	0.000346209
AGGF1P1	0.607129	1.72316e-05	0.00034647
HMGB1P15	0.769144	1.72332e-05	0.00034647
SUB1P3	0.470664	1.72583e-05	0.000346585
RPL14P3	0.426187	1.72625e-05	0.000346585
ENSG00000287706	0.799676	1.72922e-05	0.000346943
DDX6P1	0.501789	1.73485e-05	0.000347834
SPDYE12	-0.458082	1.73611e-05	0.00034785
NPM1P5	0.457061	1.73839e-05	0.000347995
HNRNPA1P46	0.509431	1.7392e-05	0.000347995
YWHAZP7	0.615875	1.74384e-05	0.000348685
RANP1	0.413091	1.74854e-05	0.000349299
WBP11P1	0.466657	1.74946e-05	0.000349299
ENSG00000261670	0.780591	1.75151e-05	0.000349299
ENSG00000258632	0.729899	1.75329e-05	0.000349299
TRAPPC5	0.846762	1.75376e-05	0.000349299
PDE6A	-0.165434	1.75405e-05	0.000349299
LINC01091	0.807253	1.75819e-05	0.00034968
RPL21P22	0.40724	1.75835e-05	0.00034968
ENSG00000213650	0.451777	1.76072e-05	0.000349915
RPL5P3	0.441879	1.76337e-05	0.000350204
TERF1P5	0.408174	1.76842e-05	0.000350865
KRT18P26	0.348686	1.76909e-05	0.000350865
GMDS-DT	0.766778	1.77154e-05	0.000351115
MPHOSPH10P1	0.43889	1.77482e-05	0.000351526
ZNF528-AS1	0.685628	1.77897e-05	0.000351534
RBM22P1	0.664126	1.77947e-05	0.000351534
ATG4AP1	0.460708	1.77963e-05	0.000351534
CALM1P2	0.682051	1.77964e-05	0.000351534
ENSG00000288719	0.980652	1.78719e-05	0.000352644
HDAC1P2	0.43697	1.78818e-05	0.000352644
ENSG00000261882	0.659264	1.78887e-05	0.000352644
ARL6IP1P2	0.498938	1.79269e-05	0.00035316
KRT18P1	0.296118	1.79537e-05	0.000353272
ERBB3	-0.235925	1.79635e-05	0.000353272
ENSG00000257777	0.599356	1.79706e-05	0.000353272
CELF2-DT	0.916917	1.79807e-05	0.000353272
CBX3P5	0.640188	1.80062e-05	0.000353536
ENSG00000259668	0.686648	1.80268e-05	0.000353589
NOTCH2	-0.206091	1.8033e-05	0.000353589
TERF1P7	0.422986	1.807e-05	0.000354078
ENSG00000284612	0.963127	1.81609e-05	0.000355622
ENSG00000228681	0.658811	1.81758e-05	0.000355676
ENSG00000266365	0.381488	1.82058e-05	0.000356004
ENSG00000274080	0.945773	1.82168e-05	0.000356004
ENSG00000284735	1.01787	1.82645e-05	0.000356486
PSMC1P2	0.591063	1.82658e-05	0.000356486
LINC00886	0.939433	1.83493e-05	0.000357744
ENSG00000267490	0.569615	1.83546e-05	0.000357744
RPS3AP35	0.5822	1.84048e-05	0.00035836
HSPA8P18	0.590996	1.84106e-05	0.00035836
RPS10P16	0.319211	1.84474e-05	0.000358838
EIF4BP4	0.80192	1.84691e-05	0.000359021
NUSAP1	0.792185	1.84851e-05	0.000359095
ENSG00000286724	0.841867	1.8511e-05	0.00035936
LINC02895	0.763308	1.8527e-05	0.000359433
ENSG00000257360	0.498052	1.85484e-05	0.000359612
SF3A3P2	0.37707	1.8574e-05	0.00035979
NXNP1	0.607071	1.85822e-05	0.00035979
NKAPP1	0.919199	1.85995e-05	0.000359889
BZW1P1	0.414275	1.86464e-05	0.000360558
RPS3AP10	0.673717	1.86799e-05	0.000360968
RPL6P20	0.404897	1.87667e-05	0.000362407
LRRFIP1P1	0.275491	1.88094e-05	0.000362993
ARHGAP31	-0.192337	1.88423e-05	0.000363389
RPL21P31	0.653614	1.88564e-05	0.000363423
RPL5P5	0.571354	1.88837e-05	0.00036371
HSP90AB7P	0.552655	1.89382e-05	0.000364187
CTDSPL2P2	0.938387	1.89428e-05	0.000364187
HNRNPA1P52	0.395292	1.8946e-05	0.000364187
ENSG00000283269	0.699008	1.89593e-05	0.000364187
MTMR14	-0.260832	1.89799e-05	0.000364187
ENSG00000177452	0.447792	1.89829e-05	0.000364187
USP12P1	0.44687	1.90065e-05	0.000364356
ENSG00000289510	0.80783	1.90166e-05	0.000364356
SRP14P1	0.631384	1.90341e-05	0.000364454
MTHFD1P1	0.297957	1.90993e-05	0.000365303
VLDLR	-0.132713	1.91033e-05	0.000365303
ENSG00000235089	0.662201	1.91362e-05	0.000365692
ELF2P3	0.583733	1.92208e-05	0.000367072
HERC2P10	0.308111	1.92633e-05	0.000367644
RPL32P21	0.650304	1.93063e-05	0.000368223
RAB11AP1	0.583826	1.93188e-05	0.000368223
LINC01234	0.821623	1.93713e-05	0.00036883
TUBA1B-AS1	0.881434	1.93757e-05	0.00036883
ENSG00000291178	0.342501	1.93894e-05	0.00036885
DOCK3	-0.142409	1.94149e-05	0.000369096
HSD3BP1	0.499292	1.94495e-05	0.000369516
ZFRP1	0.700453	1.95256e-05	0.00037057
RPL14P2	0.741073	1.95303e-05	0.00037057
GSK3B-DT	1.07643	1.9569e-05	0.000370908
ENSG00000253372	0.972313	1.95734e-05	0.000370908
WWP1P1	0.3425	1.96034e-05	0.000371239
CENPUP2	1.03855	1.96268e-05	0.000371442
RPL21P24	0.743781	1.96701e-05	0.000371848
ILF2P2	0.538637	1.96846e-05	0.000371848
ENSG00000230328	0.959044	1.96863e-05	0.000371848
CDYLP1	0.775185	1.97236e-05	0.000371979
ENSG00000254092	0.860071	1.97273e-05	0.000371979
RPL36AP5	0.617518	1.97363e-05	0.000371979
ENSG00000224136	0.678056	1.97439e-05	0.000371979
LINC02532	0.767945	1.97687e-05	0.000372207
ENSG00000258938	0.739826	1.99005e-05	0.000374379
HNRNPA1P25	0.4393	1.99096e-05	0.000374379
DDX50P1	0.362807	1.99623e-05	0.00037513
CNN3P1	0.653413	1.99874e-05	0.000375362
C4orf46P1	0.55058	2.00008e-05	0.000375372
GABPB1-AS1	0.822954	2.0035e-05	0.000375774
DRAIC	0.765526	2.00711e-05	0.00037621
DDX3P1	0.46776	2.00924e-05	0.000376371
PTMAP8	0.489276	2.01398e-05	0.000376859
LRP4	-0.322132	2.01516e-05	0.000376859
EDIL3-DT	0.914884	2.0157e-05	0.000376859
ENSG00000251204	0.478327	2.02105e-05	0.000377618
ERICH2-DT	0.921996	2.02904e-05	0.000378871
ZNF562	0.310683	2.03108e-05	0.000379011
OR6C73P	0.73058	2.03641e-05	0.000379763
RPS7P7	0.676901	2.03908e-05	0.000379825
NPM1P21	0.391799	2.03933e-05	0.000379825
POU5F1P6	0.461755	2.0499e-05	0.00038134
HSPD1P16	0.553733	2.05066e-05	0.00038134
CCT6P2	0.444483	2.05312e-05	0.00038134
ENSG00000249301	0.73545	2.05435e-05	0.00038134
MRGPRX6P	0.497392	2.0548e-05	0.00038134
ENSG00000227141	0.379781	2.05544e-05	0.00038134
NDUFA4P2	0.504891	2.05656e-05	0.00038134
CDC42	0.490112	2.06031e-05	0.000381763
ENSG00000229220	0.67319	2.06144e-05	0.000381763
ENSG00000248637	0.475762	2.06433e-05	0.000382058
PSME2P4	0.552965	2.06643e-05	0.000382131
ENSG00000259079	0.379636	2.06733e-05	0.000382131
ENSG00000231139	0.643678	2.06995e-05	0.000382175
ENSG00000228776	0.739386	2.07018e-05	0.000382175
NDUFA5P12	0.622736	2.07229e-05	0.000382296
SEC13P1	0.530672	2.07343e-05	0.000382296
ENSG00000244237	0.989471	2.0755e-05	0.000382437
DDX18P3	0.386179	2.07759e-05	0.000382581
ASS1P2	0.384771	2.08058e-05	0.000382586
ENSG00000288598	0.659348	2.08127e-05	0.000382586
NUDCP2	0.253582	2.08152e-05	0.000382586
ENSG00000260271	0.857289	2.08354e-05	0.000382717
KRT8P44	0.315549	2.09542e-05	0.000384658
KRT18P35	0.43474	2.09789e-05	0.00038487
EGFR	-0.185246	2.10923e-05	0.00038671
ENSG00000234156	0.700704	2.11651e-05	0.000387802
DDX3P3	0.451626	2.11852e-05	0.00038787
BCL9P1	0.506189	2.11952e-05	0.00038787
ENSG00000236606	0.738911	2.12172e-05	0.000388011
RPL21P42	0.516343	2.12311e-05	0.000388011
ENSG00000251017	0.543489	2.12426e-05	0.000388011
SEPHS2P1	0.793636	2.13111e-05	0.000388776
SUB1P1	0.427889	2.13122e-05	0.000388776
ENSG00000250405	0.492963	2.13242e-05	0.000388776
MFSD4B	0.239918	2.13782e-05	0.000389287
HLCS-AS1	0.819191	2.13787e-05	0.000389287
ENSG00000280087	0.8639	2.14382e-05	0.000390127
ENSG00000286757	0.71823	2.15007e-05	0.000391023
CDC27P1	0.451544	2.1536e-05	0.000391423
LINC00665	0.768055	2.15717e-05	0.000391829
KRT18P2	0.452321	2.16054e-05	0.000392197
PKP4P1	0.325608	2.1679e-05	0.000392443
ENSG00000287565	1.02434	2.16897e-05	0.000392443
ENSG00000279080	0.447088	2.16957e-05	0.000392443
ENSG00000278342	0.629323	2.17359e-05	0.000392443
ENSG00000235945	0.773991	2.17445e-05	0.000392443
HMGB1P33	0.833022	2.17445e-05	0.000392443
ENSG00000254939	0.521177	2.17496e-05	0.000392443
SGMS1-AS1	0.831613	2.17552e-05	0.000392443
ENSG00000257275	0.984895	2.17576e-05	0.000392443
ENSG00000261575	0.969951	2.17668e-05	0.000392443
ACSM6	-0.172647	2.17673e-05	0.000392443
RPS3AP49	0.406513	2.17794e-05	0.000392443
ENSG00000234147	1.06233	2.18041e-05	0.000392484
XRCC6P1	0.441752	2.18203e-05	0.000392484
RANBP20P	0.385046	2.18218e-05	0.000392484
ABCF2P1	0.311778	2.18825e-05	0.000393335
LINC01694	0.780832	2.19557e-05	0.00039441
TMEM9B-AS1	0.84632	2.2056e-05	0.000395778
TNS2-AS1	0.510132	2.20588e-05	0.000395778
ENSG00000266306	0.359843	2.20853e-05	0.000396011
LINC02223	1.01268	2.21087e-05	0.000396012
PPP1R2P10	0.633314	2.21307e-05	0.000396012
RPS3AP36	0.474241	2.21375e-05	0.000396012
PPP1R2P5	0.682461	2.21488e-05	0.000396012
AIDAP1	0.389513	2.21528e-05	0.000396012
ENSG00000279905	1.02447	2.21715e-05	0.000396105
SLC24A2	-0.148297	2.21957e-05	0.000396152
ODAD2P1	0.522359	2.22011e-05	0.000396152
NEPRO-AS1	0.799711	2.22482e-05	0.00039675
RPL5P9	0.438134	2.22685e-05	0.000396871
TPT1P1	0.732072	2.23295e-05	0.00039733
HMGN2P48	0.786773	2.23388e-05	0.00039733
FRAS1	-0.170942	2.23437e-05	0.00039733
DOCK11P1	0.409342	2.23484e-05	0.00039733
MYO1A	-0.284284	2.24024e-05	0.000398049
SLC30A4-AS1	0.764873	2.24341e-05	0.000398372
UBE2Q2P1	0.416786	2.24514e-05	0.000398438
ATP7B	-0.191052	2.24723e-05	0.000398526
LINC02604	0.704263	2.24836e-05	0.000398526
NMNAT1P5	0.551945	2.25151e-05	0.000398844
RPS26P4	0.814637	2.25843e-05	0.000399734
RPL7AP14	0.550782	2.25987e-05	0.000399734
ENSG00000286035	0.677711	2.26061e-05	0.000399734
PCNPP3	0.532203	2.26291e-05	0.000399898
TCP10L	0.926934	2.2648e-05	0.000399993
KRT18P23	0.393022	2.26633e-05	0.000400021
MEAF6P1	0.501333	2.26821e-05	0.000400113
ENSG00000287277	0.717807	2.27424e-05	0.000400667
SNF8P1	0.51317	2.27474e-05	0.000400667
HNRNPA1P53	0.414856	2.27545e-05	0.000400667
TLK2P2	0.394472	2.27997e-05	0.000401223
TPTEP1	0.524957	2.28145e-05	0.000401243
EEF1GP3	0.463406	2.28911e-05	0.000402278
RPL21P87	0.354585	2.29083e-05	0.000402278
ETS2P1	0.692626	2.29312e-05	0.000402278
PRKAR2A-AS1	0.839936	2.29391e-05	0.000402278
NACAP8	0.566614	2.29419e-05	0.000402278
SSX2IPP1	0.718968	2.29935e-05	0.000402471
ENSG00000226535	0.505493	2.30054e-05	0.000402471
RPL21P59	0.720009	2.30136e-05	0.000402471
NTAN1P2	0.524266	2.30204e-05	0.000402471
GYG1P3	0.380467	2.30215e-05	0.000402471
USP8P2	0.582417	2.30554e-05	0.000402825
PA2G4P3	0.540734	2.31049e-05	0.00040345
ENSG00000280248	0.758443	2.31391e-05	0.000403709
RPL21P60	0.452304	2.31473e-05	0.000403709
MAN1A2P1	0.617301	2.32089e-05	0.00040449
ELMO2P1	0.411452	2.32266e-05	0.00040449
VIPAS39	-0.192516	2.32691e-05	0.00040449
ENSG00000258168	0.508357	2.32736e-05	0.00040449
ANKRD62P1	0.486455	2.32868e-05	0.00040449
ENSG00000232884	0.71796	2.33046e-05	0.00040449
ENSG00000255581	0.466306	2.33137e-05	0.00040449
ENSG00000230882	0.814181	2.33281e-05	0.00040449
ENSG00000283659	0.4241	2.33338e-05	0.00040449
MIR4280HG	0.725117	2.33362e-05	0.00040449
LINC01284	0.636676	2.33495e-05	0.00040449
SRSF3P4	0.476411	2.33574e-05	0.00040449
NCAPD2P1	0.393445	2.34081e-05	0.000404798
COBLP1	0.291311	2.34192e-05	0.000404798
MIATNB	0.866218	2.34212e-05	0.000404798
SMIM14-DT	0.984343	2.34304e-05	0.000404798
ENSG00000284642	0.902924	2.34647e-05	0.000405152
ENSG00000286071	0.563214	2.35013e-05	0.000405545
ENSG00000226824	0.958098	2.35304e-05	0.000405809
ENSG00000258500	0.686234	2.36058e-05	0.000406483
RPL21P115	0.665424	2.36321e-05	0.000406483
SDAD1P2	0.382925	2.36411e-05	0.000406483
AK3P5	0.503102	2.36423e-05	0.000406483
LINC02506	0.941948	2.36493e-05	0.000406483
ENSG00000261324	0.784634	2.36525e-05	0.000406483
ENSG00000228700	0.821138	2.36716e-05	0.000406573
SGCEP1	0.684266	2.37048e-05	0.000406905
SERBP1P3	0.499556	2.37234e-05	0.000406985
DNMT3B	-0.274173	2.376e-05	0.000407376
IGSF11	-0.186539	2.38608e-05	0.000408636
MAPK6P3	0.46698	2.38734e-05	0.000408636
PRORP	0.899478	2.38753e-05	0.000408636
ENSG00000259601	0.626841	2.39044e-05	0.000408896
SAR1AP1	0.446631	2.39479e-05	0.000409401
ENSG00000270842	0.891252	2.40009e-05	0.00041007
NPM1P14	0.716252	2.40345e-05	0.000410404
ENSG00000266907	0.317482	2.40794e-05	0.000410426
MFSD1P1	0.574325	2.40818e-05	0.000410426
GRPEL2P2	0.598447	2.40844e-05	0.000410426
ENSG00000253706	0.710081	2.40917e-05	0.000410426
HNRNPA1P39	0.451438	2.41152e-05	0.000410589
RPL35AP35	0.662408	2.41432e-05	0.000410748
RPS26P22	0.698353	2.41526e-05	0.000410748
RPL32P22	0.738023	2.41757e-05	0.000410848
MTERF1	0.278444	2.41865e-05	0.000410848
DNAJB6P4	0.608631	2.43194e-05	0.000412867
MPV17L	0.371611	2.43517e-05	0.000413176
MTA3P1	0.551233	2.44173e-05	0.00041405
GYG1P1	0.376109	2.44868e-05	0.000414989
NACAP10	0.787922	2.45551e-05	0.000415907
UBTFL11	0.63808	2.46384e-05	0.000417077
SNORA30B	0.556101	2.46698e-05	0.000417228
ZBTB8OSP1	0.718325	2.46773e-05	0.000417228
KRT18P66	0.457382	2.469e-05	0.000417228
YWHAQP4	0.510015	2.47629e-05	0.000418049
EIF3J-DT	0.96201	2.47711e-05	0.000418049
ENSG00000229695	0.467657	2.47829e-05	0.000418049
CTAGE12P	0.338466	2.47955e-05	0.000418049
RPL7AP77	0.638941	2.48501e-05	0.000418685
SLC6A5	-0.207365	2.48618e-05	0.000418685
SSBL2P	0.506681	2.49604e-05	0.000420104
LINC01484	0.777892	2.49935e-05	0.000420421
C10orf143	0.856207	2.50636e-05	0.000421358
ENSG00000267408	0.616426	2.50884e-05	0.000421535
PFKM	-0.226906	2.51111e-05	0.000421549
ENSG00000243176	0.774558	2.5118e-05	0.000421549
ZNF587	0.606662	2.51724e-05	0.000422221
ENSG00000282852	0.890179	2.51889e-05	0.000422257
EPPIN-WFDC6	-0.338379	2.52053e-05	0.000422289
TMEM161B-DT	0.772004	2.52528e-05	0.000422613
MUC20-OT1	0.633108	2.52609e-05	0.000422613
MORF4L2	0.279661	2.52817e-05	0.000422613
RPL32P15	0.630959	2.52933e-05	0.000422613
DNMT3AP1	0.601925	2.52966e-05	0.000422613
CHD4	0.465451	2.53301e-05	0.000422914
KRT18P6	0.485267	2.53751e-05	0.000422914
ENSG00000225356	0.516773	2.53805e-05	0.000422914
NCSTN	-0.213624	2.53817e-05	0.000422914
SMARCE1	0.29341	2.53867e-05	0.000422914
SLFNL1-AS1	0.899853	2.54286e-05	0.000423372
ENSG00000284959	0.816884	2.55288e-05	0.0004248
RPL23AP15	0.377092	2.55457e-05	0.00042484
RPL7P61	0.71438	2.55611e-05	0.000424856
RAB28P5	0.568202	2.56098e-05	0.000425423
ENSG00000283294	0.603384	2.56508e-05	0.000425864
GTF2F2P1	0.588186	2.56876e-05	0.000426235
RPS26P52	0.474405	2.58228e-05	0.000428149
ENSG00000217644	0.70762	2.58352e-05	0.000428149
RPL15P15	0.49347	2.58701e-05	0.000428149
EIF4A2P2	0.591377	2.58734e-05	0.000428149
PDCL3P3	0.318538	2.58759e-05	0.000428149
AURKAP2	0.526005	2.58928e-05	0.000428187
ENSG00000227388	1.07545	2.59121e-05	0.000428265
RAD23BP1	0.297385	2.59633e-05	0.000428861
RAB4A-AS1	0.827678	2.59774e-05	0.000428861
ENSG00000232807	0.924754	2.60316e-05	0.000429515
LINC00900	0.853386	2.61399e-05	0.000431042
DUXAP3	0.805508	2.61659e-05	0.000431042
ENSG00000248288	0.602923	2.61683e-05	0.000431042
ENSG00000285658	0.687083	2.62029e-05	0.000431106
ENSG00000239696	0.531372	2.62101e-05	0.000431106
RPS4XP15	0.850235	2.62162e-05	0.000431106
ENSG00000286661	0.878436	2.62529e-05	0.000431468
SPRY4-AS1	0.790217	2.63215e-05	0.000432148
PARK7P2	0.542548	2.63237e-05	0.000432148
UBE2WP1	0.461689	2.64364e-05	0.000433756
LINC02984	0.905645	2.64806e-05	0.000434238
ENSG00000285388	0.805576	2.65459e-05	0.000434964
RUBCN	-0.256026	2.6559e-05	0.000434964
ENSG00000290092	0.885096	2.65694e-05	0.000434964
UBQLN1-AS1	0.296378	2.66191e-05	0.000435535
SEPHS1P1	0.297636	2.66471e-05	0.000435612
ENSG00000287170	0.87049	2.66534e-05	0.000435612
ENSG00000287920	0.879881	2.66989e-05	0.000436112
H3P2	0.60744	2.6799e-05	0.000437272
TDGF1P5	0.431609	2.68001e-05	0.000437272
MRPL50P2	0.496011	2.68146e-05	0.000437272
SMARCAL1	-0.164854	2.68751e-05	0.000438014
ENSG00000290762	0.424055	2.69484e-05	0.000438773
ENSG00000229742	0.813485	2.69515e-05	0.000438773
LINC01607	1.002	2.69902e-05	0.000439047
PSMA2	0.323591	2.69983e-05	0.000439047
RPL23AP96	0.401721	2.70379e-05	0.00043921
ENSG00000229727	0.853164	2.70389e-05	0.00043921
TOMM20P2	0.622756	2.70532e-05	0.00043921
RPL27P12	0.872083	2.71106e-05	0.000439899
NANOGP10	0.35614	2.71263e-05	0.000439911
RBBP4P5	0.42166	2.71809e-05	0.000440553
FAM106B	-0.50829	2.7203e-05	0.000440667
ENSG00000248827	0.421555	2.73099e-05	0.000442155
CTNNA1P1	0.337624	2.73705e-05	0.000442892
KRT8P43	0.413074	2.74539e-05	0.000443996
NPM1P46	0.399711	2.74747e-05	0.000444088
RSL24D1P4	0.631646	2.74898e-05	0.000444088
RPS3AP5	0.287696	2.756e-05	0.000444977
ANXA2R-AS1	1.02317	2.77296e-05	0.000446932
ELOCP33	0.718335	2.77315e-05	0.000446932
ENSG00000242162	0.560992	2.77381e-05	0.000446932
ENSG00000280011	0.728699	2.7742e-05	0.000446932
WDR70P1	0.470998	2.77957e-05	0.000447551
PABPC1P1	0.376387	2.78569e-05	0.000448291
SMPD4P1	0.457109	2.80157e-05	0.000450601
PPIAP70	0.444292	2.8041e-05	0.00045076
RPS27AP12	0.429699	2.80923e-05	0.000451312
HIF1A-AS3	0.91538	2.81232e-05	0.000451312
ENSG00000285945	0.778208	2.81329e-05	0.000451312
RPL7AP31	0.48204	2.81368e-05	0.000451312
RPL11P5	0.617637	2.82845e-05	0.000453432
ALDH1A3-AS1	0.480481	2.83565e-05	0.000454338
ENSG00000261278	0.739082	2.83748e-05	0.000454362
KRT8P19	0.370612	2.83889e-05	0.000454362
KRT19P2	0.607094	2.84533e-05	0.000455139
CHCHD2P7	0.61578	2.84685e-05	0.000455139
DDR2	-0.194581	2.85223e-05	0.000455751
ENSG00000214770	0.97958	2.8554e-05	0.00045601
ENSG00000253330	0.461001	2.85902e-05	0.000456166
ZNF37BP	0.562893	2.85949e-05	0.000456166
LRRFIP2P1	0.666458	2.87483e-05	0.000458364
PRELID3BP3	0.559307	2.87657e-05	0.000458393
ENSG00000290698	0.571898	2.88111e-05	0.000458867
NIPA2P4	0.889253	2.89144e-05	0.000460075
ENSG00000227486	0.639629	2.89183e-05	0.000460075
LINC02994	0.830351	2.89542e-05	0.000460291
ENSG00000253853	1.02242	2.8969e-05	0.000460291
ENSG00000232732	1.00738	2.89856e-05	0.000460291
ROR1-AS1	0.927572	2.89946e-05	0.000460291
PES1P2	0.56124	2.9024e-05	0.000460509
GXYLT1P2	0.59403	2.91275e-05	0.000461107
RFPL3S	0.333385	2.91304e-05	0.000461107
CCNG1P1	0.657234	2.91342e-05	0.000461107
ENSG00000256913	0.279122	2.91352e-05	0.000461107
RPL17P50	0.412977	2.91403e-05	0.000461107
RN7SL1	4.46223	2.91748e-05	0.000461329
ENSG00000254817	0.414115	2.91857e-05	0.000461329
KCTD21-AS1	0.840354	2.92038e-05	0.000461367
ICE2P2	0.509055	2.92427e-05	0.000461733
WARS2-AS1	0.758107	2.92902e-05	0.000462038
EIF5AP2	0.436001	2.93044e-05	0.000462038
ENSG00000250725	0.806786	2.93125e-05	0.000462038
CCR5AS	0.731116	2.9325e-05	0.000462038
ENSG00000290971	0.680023	2.93416e-05	0.000462051
API5P2	0.442142	2.93923e-05	0.000462602
GLULP3	0.369586	2.94321e-05	0.00046298
TNRC18P1	0.491192	2.9479e-05	0.000463179
GAPDHP75	0.691267	2.94856e-05	0.000463179
RPL23AP8	0.53288	2.95234e-05	0.000463179
LINC01721	0.829698	2.95276e-05	0.000463179
MIR100HG	0.713205	2.95557e-05	0.000463179
ENSG00000280225	0.716218	2.95585e-05	0.000463179
AKR1B1	-0.271706	2.95708e-05	0.000463179
GRIK1	-0.123535	2.9571e-05	0.000463179
MAPK6P4	0.445701	2.95964e-05	0.000463216
HSP90B2P	0.422083	2.96049e-05	0.000463216
RPL21P52	0.464871	2.96355e-05	0.000463337
RPS17P1	0.413698	2.96442e-05	0.000463337
PCAT14	0.800319	2.96693e-05	0.000463358
HSPA8P8	0.570971	2.96772e-05	0.000463358
HNRNPA3P12	0.359965	2.97099e-05	0.000463622
CKS1BP6	0.500381	2.9767e-05	0.000464267
BASP1-AS1	0.849169	2.97899e-05	0.000464345
ENSG00000237317	0.777777	2.98037e-05	0.000464345
THUMPD3P1	0.692215	2.99587e-05	0.000466007
PHB1P11	0.325251	2.99591e-05	0.000466007
STRADBP1	0.287447	2.99717e-05	0.000466007
UQCRFS1P2	0.578379	2.99861e-05	0.000466007
ENSG00000218586	0.355824	2.99897e-05	0.000466007
SLC26A4-AS1	0.829351	3.0034e-05	0.000466449
ENSG00000253667	0.584487	3.01167e-05	0.000466987
NRBF2P5	0.536893	3.01303e-05	0.000466987
ENSG00000293413	0.722488	3.01325e-05	0.000466987
ZNF584-DT	0.716801	3.01496e-05	0.000466987
ENSG00000235377	0.506749	3.01524e-05	0.000466987
ENSG00000227417	0.406972	3.01641e-05	0.000466987
ENSG00000277499	0.847593	3.02139e-05	0.000467455
PSMC2P1	0.392187	3.02262e-05	0.000467455
H2AP	-0.412133	3.02624e-05	0.000467768
C2orf69P1	0.697022	3.02888e-05	0.00046793
LINC02298	1.00153	3.03262e-05	0.000468262
JAM3	-0.221696	3.03488e-05	0.000468284
SFR1P2	0.662268	3.03596e-05	0.000468284
LINC02334	0.686705	3.04221e-05	0.000468603
RPL7P44	0.476121	3.04228e-05	0.000468603
IMMP1LP2	0.632146	3.04281e-05	0.000468603
RPS18P13	0.415855	3.04627e-05	0.000468889
ENSG00000293268	0.712042	3.06383e-05	0.000471345
RSL24D1P2	0.615559	3.06733e-05	0.000471636
ENSG00000267199	0.821213	3.07124e-05	0.000471758
OR7E28P	0.565483	3.07134e-05	0.000471758
U2SURPP1	0.464515	3.07616e-05	0.000472252
PAQR9-AS1	1.00569	3.07789e-05	0.000472265
FABP3P2	0.725329	3.07946e-05	0.000472265
ENSG00000249600	0.679268	3.0821e-05	0.000472422
ENSG00000259363	0.364473	3.089e-05	0.000473003
RPL6P8	0.902323	3.08954e-05	0.000473003
PPIAP6	0.325881	3.09072e-05	0.000473003
TWSG1-DT	1.01102	3.09641e-05	0.000473627
RPL17P8	0.45735	3.10121e-05	0.000474005
IGLV3-13	0.551809	3.10236e-05	0.000474005
ENSG00000261329	0.766635	3.10492e-05	0.000474005
ENSG00000254712	0.475333	3.10534e-05	0.000474005
ZBTB8OSP2	0.36939	3.11629e-05	0.000475225
LINC00578	0.949557	3.11657e-05	0.000475225
ENSG00000236160	0.808648	3.11931e-05	0.000475395
ARL2BPP8	0.518215	3.12209e-05	0.000475493
PRSS12	-0.136878	3.12319e-05	0.000475493
ENSG00000215409	0.615687	3.1286e-05	0.000476069
ASH2LP2	0.694266	3.13837e-05	0.000477309
RPL5P22	0.442047	3.1402e-05	0.00047734
ENSG00000226233	0.693799	3.14237e-05	0.000477423
CROCCP1	0.390222	3.14487e-05	0.000477555
NSA2P5	0.598147	3.15096e-05	0.000478232
KNOP1P4	0.62167	3.15707e-05	0.000478912
TBCAP3	0.668702	3.16239e-05	0.000479471
OBI1-AS1	0.730018	3.16629e-05	0.000479655
COP1-DT	0.79723	3.16687e-05	0.000479655
ENSG00000227733	0.992295	3.17318e-05	0.000480364
OR6C72P	0.65867	3.18081e-05	0.000481269
FCRL4P1	0.533166	3.18329e-05	0.000481397
PSMC1P11	0.407944	3.1887e-05	0.000481967
ENSG00000258440	0.487904	3.19514e-05	0.000482355
ENSG00000229322	0.563187	3.1956e-05	0.000482355
RPS7P14	0.514526	3.1962e-05	0.000482355
EEF1A1P46	0.561439	3.19888e-05	0.000482512
CSNK1A1P3	0.496358	3.20651e-05	0.000483233
ENSG00000239615	0.752757	3.20761e-05	0.000483233
RPL31P61	0.581438	3.2086e-05	0.000483233
EXTL3-AS1	0.989652	3.21499e-05	0.000483584
RPL21P62	0.444991	3.21579e-05	0.000483584
LINC02575	0.945985	3.21588e-05	0.000483584
MED28P4	0.503421	3.23346e-05	0.000485979
MERTK	-0.147724	3.23663e-05	0.000486207
R3HDM2P1	0.678787	3.2407e-05	0.000486548
PPIAP74	0.404184	3.24222e-05	0.000486548
HAUS6P1	0.256509	3.24419e-05	0.000486595
LINC01837	0.874277	3.25178e-05	0.000487404
ENSG00000279927	0.974669	3.2529e-05	0.000487404
ENSG00000279790	0.87681	3.26328e-05	0.000488459
KHDC1-AS1	0.701978	3.26627e-05	0.000488459
HMGB1P48	0.643799	3.26701e-05	0.000488459
ENSG00000232027	0.53785	3.26718e-05	0.000488459
ENSG00000227236	0.672688	3.26826e-05	0.000488459
SMIM7	0.34426	3.27882e-05	0.000489787
ENSG00000231741	0.607676	3.28358e-05	0.000490249
ENSG00000248794	0.733752	3.29262e-05	0.000491348
RPL7P29	0.612317	3.29719e-05	0.000491618
OR7E105P	0.311456	3.29778e-05	0.000491618
LINC00461	0.596827	3.30319e-05	0.000492125
SUCLA2P2	0.674464	3.30587e-05	0.000492125
KDM4E	-0.267073	3.30647e-05	0.000492125
SNAP25-AS1	0.922733	3.30799e-05	0.000492125
H1-8P1	0.506375	3.3119e-05	0.000492125
PAIP1P1	0.638349	3.31288e-05	0.000492125
ENSG00000284377	0.667739	3.31561e-05	0.000492125
ENSG00000196390	0.421919	3.31614e-05	0.000492125
KARS1P3	0.547398	3.31628e-05	0.000492125
NUS1P4	0.48153	3.31794e-05	0.000492125
PDK4-AS1	0.912977	3.32642e-05	0.000492823
SNHG3	0.487572	3.32752e-05	0.000492823
WASF3-AS1	0.875101	3.32969e-05	0.000492823
PDE7B-AS1	0.791561	3.33025e-05	0.000492823
LINC01967	0.93807	3.33104e-05	0.000492823
LINC01823	0.844935	3.33822e-05	0.000493636
PPP1R2P2	0.601892	3.34004e-05	0.000493656
RPS17P8	0.520467	3.34808e-05	0.000494596
MT-CO2	2.64803	3.36241e-05	0.000496431
LINC02359	0.851968	3.36539e-05	0.000496431
ENSG00000225402	0.376804	3.36557e-05	0.000496431
NMD3P2	0.393969	3.3698e-05	0.000496562
ENSG00000276109	0.816443	3.36985e-05	0.000496562
PA2G4P6	0.34398	3.37636e-05	0.00049705
PPIAP5	0.601405	3.37655e-05	0.00049705
ARL6IP1P3	0.493087	3.3803e-05	0.000497354
LINC02977	0.916098	3.39045e-05	0.000498369
QRSL1P2	0.469237	3.39096e-05	0.000498369
SCOCP1	0.612411	3.39359e-05	0.000498369
[truncated: 9,861 more rows]
