# Supplementary material for: Maternal Plasma Cell-Free RNA as a Predictor of Early and Late-Onset Preeclampsia Throughout Pregnancy
Source: Research Square preprint supplement (doi:10.21203/rs.3.rs-5684050/v1), 2025-01-16
Supplement: Supplementary file 5 [file dffc9b308a72c9a9fcedbf35.xlsx]

## Sheet: Supplementary Table 4
Table S4. Gene ontology analysis for increased abundant cfRNA in early-onset preeclampsia and late-onset preeclampsia.
ID	Description	GeneRatio	BgRatio	Pvalue	P.adjust	Qvalue	GeneID	Count	Category	Group	Ratio (%)
GO:0048568	embryonic organ development	268/8772	427/18723	1.7046e-11	1.35324e-08	9.94722e-09	NOTCH2/IFT122/FGFR2/EOMES/USH1C/EPHB2/EPAS1/TBX15/ROR2/COL2A1/MED12/TGFB3/TPO/MKS1/POLE/IFT172/GATA1/TGFBR2/PTCH1/VASH2/PAX2/TUBB2B/SUFU/MYO15A/GLI3/ADA/NSDHL/TBX1/WHRN/CTNNB1/ERCC3/STRC/RBP4/STRA6/GATA4/SMAD3/KCNQ1/NDST1/ST14/PKD1/TRIOBP/BMP7/DSCAML1/SALL1/PCSK5/KRT19/PAX6/GRHL2/CHST11/NAGLU/MAP2K1/CSF2/SPRY2/DLL1/MYO7A/BMP4/FGF8/CCDC40/PAX8/TEAD4/FOLR1/SLC44A4/SPINT1/ATP6V1B1/AKT1/ERCC2/TBX4/KC…	268	EOPE & LOPE	EOPE	62.7635
GO:0007611	learning or memory	157/8772	255/18723	1.41243e-06	9.64555e-05	7.09014e-05	TREM2/INSR/GRIN2B/PRNP/EGFR/EPHB2/ATP1A2/LDLR/SYNGAP1/PLA2G6/NCSTN/NTRK1/GPI/NLGN3/PRKCG/ABCC8/SHANK2/NRXN3/RASGRF1/STRA6/MTOR/GRIN2A/AAAS/SLC2A4/ADCY3/LMX1A/DBH/ITPR3/CHRNB2/VLDLR/BRINP1/NRXN2/GM2A/CTNS/MAP1A/CDK5/TNR/GHSR/SLC12A5/CIC/GRPR/EN1/SLC1A1/SERPINF1/AGER/RAG1/SLC24A2/ADCY8/NDRG4/CX3CR1/CNR1/TH/NFATC4/RIC8A/ADCY1/DRD3/PRKN/EGR2/HTT/SLC6A4/SHANK3/NTRK2/GRIN1/AGT/CNTNAP2/SRF/ITGA3/PAK5/PP…	157	EOPE & LOPE	EOPE	61.5686
GO:0008217	regulation of blood pressure	114/8772	186/18723	4.911e-05	0.00133862	0.000983975	NPR2/MYH6/ATP1A2/ABAT/TRPV1/TAC3/EXT2/SMAD3/ADRB2/KCNQ1/ECE1/LRP5/EXT1/PLCB3/CYP4F2/P2RX1/CYP4A11/CYP11B2/CYP11B1/MC3R/PCSK5/NAV2/ACE/ANPEP/NPR1/DLL1/RPS6KA2/REN/CORO2B/AR/GJA5/NISCH/CTSG/KLK3/NOS2/CALCA/CNR1/GJA1/OR51E2/ACVRL1/DRD3/COL1A2/NOS3/ACTA2/AGT/EDN3/CARTPT/PPARA/F2RL1/RARRES2/P2RX2/DRD2/NOS1/CMA1/GCGR/PTGS1/RAMP2/SERPINF2/GRIP2/LEP/AVPR2/CHGA/RENBP/TAC4/TPM1/EDN2/AGTRAP/ADM/KLK2/PDGFB/W…	114	EOPE & LOPE	EOPE	61.2903
GO:0150104	transport across blood-brain barrier	58/8772	87/18723	0.000147515	0.00301243	0.00221434	ABCC2/INSR/ATP1A2/SLC5A1/SLC7A3/ABCC5/LRP2/LRP1/SLCO3A1/SLC38A5/ABCC3/SLC2A4/ABCC1/SLC27A4/ATP2B4/SLC6A13/SLC5A5/SLC5A6/SLC29A1/SLC2A1/SLC29A2/SLC6A6/SLC16A2/SLC22A5/SLC38A3/MFSD2A/SLC7A5/SLC1A1/AGER/SLC2A10/SLC6A9/ABCA2/ATP2A3/SLC24A3/SLC6A17/SLC4A3/ATP1A4/SLC7A8/SLC7A1/SLC28A2/SLCO2B1/ATP1B2/SLC6A1/SLC22A8/SLC1A3/SLC8A2/SLC19A1/AVPR1B/LRP3/SLC6A20/SLC1A4/SLC13A3/SLC1A5/SLC22A1/APOE/SLC29A4/AVPR…	58	EOPE & LOPE	EOPE	66.6667
GO:0003091	renal water homeostasis	18/8772	21/18723	0.00027029	0.00444495	0.00326734	MYO5B/AKR1B1/CYP4F2/CYP4A11/CYP11B2/ATP6V1B1/ADCY6/AQP4/WFS1/PRKACG/AQP3/PRKACA/HYAL2/AQP2/INPP5K/TFAP2B/AQP1/CYP4F12	18	EOPE & LOPE	EOPE	85.7143
GO:0007611	learning or memory	73/3067	255/18723	5.69501e-07	4.5952e-05	3.69261e-05	RELN/CNTNAP2/VLDLR/EGFR/SLC24A2/NCSTN/GRM5/CHRNB2/SLC1A1/NRXN1/BRINP1/NRXN3/SYNGAP1/GRIN2B/AAAS/ABCC8/INSR/PRKN/GRIN2A/TREM2/KIT/NGF/PRKCG/BDNF/CSMD1/RIC8A/CTNS/MAP1A/ATP1A2/EPHB2/LDLR/ADCY3/KCNK2/NTRK1/TNR/HTT/CNR1/RAG1/SHANK2/CIC/NRXN2/STRA6/SLC6A4/GHSR/CDK5/PLA2G6/DRD2/ITPR3/NTRK2/NLGN3/LMX1A/PRNP/NPTN/ITGA3/SORCS3/SERPINF1/MAPT/SLC8A3/GRPR/ADCY1/DBH/DRD3/MTOR/PAK5/PTCHD1/NFATC4/LHX8/PPP1R9B/P…	73	EOPE & LOPE	LOPE	28.6274
GO:0150104	transport across blood-brain barrier	31/3067	87/18723	1.01012e-05	0.000490305	0.000393998	LRP2/SLC1A1/ABCC1/ABCC2/SLC5A1/INSR/SLC1A3/SLC6A6/ABCC5/ATP2B4/SLC22A5/ATP1A2/SLC24A3/ABCC3/SLC5A6/SLC2A10/SLC29A2/ATP2A3/SLC27A4/SLC7A8/SLCO3A1/SLC6A13/SLC15A2/SLC16A1/SLC6A9/SLC38A5/SLC16A2/SLC22A8/LRP1/SLC7A5/SLC5A5	31	EOPE & LOPE	LOPE	35.6322
GO:0008217	regulation of blood pressure	51/3067	186/18723	9.29812e-05	0.00252267	0.00202716	EXT2/TAC3/NPR2/COL1A2/ECE1/EXT1/F2R/SMAD3/P2RX1/KCNQ1/LEP/NPPA/CYP4A11/CYP11B2/REN/MYH6/ATP1A2/NPR1/CNR1/MC3R/CORO2B/ACVRL1/ADAMTS16/DRD2/LRP5/ACTA2/DLL1/RPS6KA2/TRPV1/ATP1A1/CYP11B1/GJA1/PCSK5/HSD11B2/DRD3/GJA5/TNNI3/PLCB3/TACR3/FFAR3/NISCH/HMOX1/KLK3/NOS1/CARTPT/CORIN/EDN3/PTGS1/CYP4F2/AGTRAP/ABAT	51	EOPE & LOPE	LOPE	27.4194
GO:0003091	renal water homeostasis	11/3067	21/18723	0.000157995	0.00391085	0.00314267	AKR1B1/MYO5B/AQP4/CYP4A11/CYP11B2/AQP2/ADCY6/PRKACG/WFS1/TFAP2B/CYP4F2	11	EOPE & LOPE	LOPE	52.3809
GO:0048568	embryonic organ development	94/3067	427/18723	0.00130958	0.018534	0.0148935	FBN2/FBN1/CTNNB1/TMIE/KDR/MKS1/NOTCH2/SUFU/IFT122/TGFB3/USH1C/ALDH1A2/COL2A1/ERCC3/TGFBR2/IFT172/SPRY2/EFEMP1/SMAD3/NAGLU/PTCH1/KCNQ1/KIT/RUNX2/TBX15/MMP14/PDGFRA/FOLR1/GRHL2/MYO15A/ADA/DSCAML1/PAX6/MYO7A/EPHB2/RBPMS2/EPAS1/MED12/BMP7/FGFR2/EOMES/NDST1/TBX20/VASH2/ST14/SLC44A4/BBS4/VEGFA/NSDHL/STRA6/EPHA2/PKD1/BMP4/MAPK3/WHRN/KCNQ4/HYAL1/DLL1/FOXE1/GLI3/FBXW8/FRZB/ENG/PRDM1/PCSK5/GLI2/VANGL2/POLE…	94	EOPE & LOPE	LOPE	22.0141
GO:0045580	regulation of T cell differentiation	95/8772	146/18723	6.54481e-06	0.000314895	0.000231469	FANCA/IL2RA/TGFBR2/GLI3/ADA/SLC46A2/IL12B/FOXP3/ZMIZ1/IL12RB1/PIK3R6/BMP4/ABL1/CLPTM1/AP3D1/GLI2/RAG1/CARD11/SYK/SASH3/ZC3H12A/STAT5B/IL4R/FOXN1/LGALS9/LAG3/GATA3/ZAP70/ERBB2/SHH/SART1/ZBTB16/CYP26B1/JAK3/SH3RF1/SOX13/PRKCZ/DTX1/TESPA1/LOXL3/LILRB2/HLA-G/IFNL1/IL23A/ZNF683/BCL6/PRDM1/CCL19/ADAM8/NFKBID/IL36B/RARA/IHH/KAT2A/CTLA4/LILRB4/TCF7/NCKAP1L/FGL2/PCK1/CD80/CD27/DUSP10/XBP1/LEF1/METTL3/IL4I…	95	EOPE	EOPE	65.0685
GO:0016055	Wnt signaling pathway	253/8772	444/18723	9.43384e-06	0.000404827	0.000297575	GRB10/LRP4/FGFR2/EGFR/CDH3/RNF213/ROR2/MED12/MKS1/AMER1/MCC/ANKRD6/SMARCA4/VCP/GLI3/APCDD1/TSC2/LRP1/CTNNB1/NPHP4/PORCN/BCL9/SMAD3/HDAC1/PRDM15/LRP5/DAAM2/EXT1/VANGL1/TNN/TERT/DDB1/LMBR1L/COL1A1/PKD1/MYOC/RNF43/SALL1/TRPM4/GNAQ/CELSR3/ADGRA2/FOLR1/ABL1/RNF220/KLHL12/AXIN1/SEMA5A/CELSR2/LGR6/TLE6/EDA/GRK5/PAF1/WNT7A/AMOTL1/GRHL3/RSPO4/TMEM9/CCN4/HECW1/WNT10B/CCDC88C/EMD/VANGL2/NFATC4/WNK2/NDRG2/PR…	253	EOPE	EOPE	56.982
GO:0002526	acute inflammatory response	75/8772	112/18723	1.31953e-05	0.000520519	0.000382617	FN1/C3/TRPV1/ASS1/LBP/F2/BTK/EXT1/F12/STAT3/HFE/SERPINC1/APOA2/B4GALT1/OGG1/SERPINA1/LCN2/CCR7/REG3G/CNR1/CREB3L3/GATA3/DNASE1/IL1B/AHSG/CD163/ORM2/ALOX5AP/TNFRSF11A/ICAM1/REG3A/FUT7/TFR2/FCGR2B/SERPINF2/CXCR2/IL20RB/ZP3/CRP/ELANE/TREM1/CD6/APCS/UGT1A1/FFAR3/GSTP1/ADAM8/IL6R/APOL2/RHBDD3/TNF/PLA2G2D/NLRP6/PIK3CG/SAA1/HP/NLRP3/ACVR1/IL31RA/IL4/HAMP/MRGPRX1/PTGES/OSM/IL6/ORM1/MYLK3/SIGIRR/HPR/DNASE…	75	EOPE	EOPE	66.9643
GO:0070997	neuron death	202/8772	361/18723	0.000286818	0.00453565	0.00333401	ERBB3/TREM2/GRIN2B/PRNP/EIF4G1/STXBP1/PARP1/TGFB3/SYNGAP1/NCSTN/ITGAM/NTRK1/DHCR24/GPI/PRKCG/LRP1/CTNNB1/AARS1/NLRP1/MTOR/HDAC1/MYBL2/HYOU1/TERT/GRIK5/HDAC4/STAT3/AXL/STAR/EPHB1/ITGB2/KIR3DL2/TRPM2/FGF8/CDK5/ABL1/CDK5R1/GRN/AKT1/PCSK9/CLU/SSH1/TNFRSF21/EN1/SLC1A1/SERPINF1/LCN2/MAG/PPP5C/UNC5B/AKT2/PTK2B/HTRA2/FAIM2/PINK1/SLC9A1/CX3CR1/TP63/POU4F3/CHMP4B/NFATC4/TNFRSF1B/WFS1/PRKN/G6PD/ARRB2/NSMF/C…	202	EOPE	EOPE	55.9557
GO:0002690	positive regulation of leukocyte chemotaxis	59/8772	94/18723	0.0013491	0.013753	0.0101094	LBP/SERPINE1/RAC2/CSF1R/TRPV4/F7/CALR/XCL2/CCR7/PTK2B/CX3CR1/EDN3/LGALS9/VEGFA/CMKLR1/F2RL1/RARRES2/S100A14/LGMN/CXCR2/THBS1/CCL3/CXCL12/CCL21/CSF1/EDN2/WNK1/IL34/C3AR1/FPR2/CCL19/TIRAP/IL6R/MAPK3/RIPOR2/DAPK2/PGF/NCKAP1L/WNT5A/CCL4/CCR1/SLAMF1/XCL1/GAS6/CCL1/PRSS56/THBS4/IL4/MDK/CAMK1D/IL6/CD74/CREB3/SPI1/DEFB124/C5AR1/AIF1/VEGFB/CXCL17	59	EOPE	EOPE	62.766
GO:0002446	neutrophil mediated immunity	25/8772	34/18723	0.00145051	0.014394	0.0105806	ITGAM/F2/MYD88/SCNN1B/ITGB2/ACE/CD177/CTSG/JAGN1/SYK/DNASE1/F2RL1/PRAM1/ELANE/TREM1/PLA2G1B/TUSC2/WDR1/NLRP6/STXBP2/PTAFR/IL6/SPI1/AZU1/DNASE1L3	25	EOPE	EOPE	73.5294
GO:0071353	cellular response to interleukin-4	24/8772	33/18723	0.00231322	0.0196995	0.0144805	MCM2/ADAMTS13/FASN/STAT6/RPL3/CDK4/ALAD/PML/IL4R/GATA3/CORO1A/CD300LF/RUFY4/JAK3/DCSTAMP/KEAP1/TCF7/XBP1/LEF1/IL24/IL2RG/XCL1/IMPDH2/RPLP0	24	EOPE	EOPE	72.7273
GO:0097205	renal filtration	19/8772	26/18723	0.00610492	0.0390325	0.0286916	RHPN2/TMEM63C/IGHA2/CORO2B/GJA5/MCAM/GJA1/ITGA3/F2RL1/IGKV3-20/IGHA1/SULF2/PDGFB/MYO1E/F2R/CYBA/GAS6/CD34/XPNPEP3	19	EOPE	EOPE	73.0769
GO:0019730	antimicrobial humoral response	71/8772	122/18723	0.00760733	0.0453828	0.0333595	KRT6A/COLEC11/PLA2G6/F2/IL36RN/NOD2/IGHM/CST9L/FGA/DEFB4A/IGHA2/TF/CTSG/GNLY/KLK3/REG3G/KLK5/KLK7/DMBT1/HRG/PGC/SLPI/WFDC2/ANG/CST9/RARRES2/PGLYRP1/WFDC5/WFDC10B/REG3A/REG1B/BPIFA1/IL17F/IGKV3-20/CST9LP1/PGLYRP4/SFTPD/IL17A/IGHA1/LTF/ELANE/ROMO1/PLA2G1B/PRTN3/PRSS3/PGLYRP3/FAM3A/ACOD1/WFDC10A/CCL13/WFDC12/LEAP2/SLC11A1/CXCL14/REG1A/DEFB118/BCL3/CAMP/WFDC9/PI3/DEFA5/DEFB126/WFDC3/GALP/GAPDH/AZU1/M…	71	EOPE	EOPE	58.1967
GO:0032757	positive regulation of interleukin-8 production	39/8772	62/18723	0.00792519	0.0462194	0.0339744	LBP/MYD88/AFAP1L2/SERPINE1/NOD2/STAT3/CHI3L1/APOA2/GDF2/NOS2/PRG3/SYK/LGALS9/IL1B/F2RL1/LILRA2/PRKD2/LEP/HYAL2/ELANE/PLA2G1B/NOD1/TIRAP/F2R/CD244/TNF/WNT5A/RELA/PYCARD/DDIT3/RIPK1/IL6/CD74/FADD/CD14/NLRP10/FFAR2/HSPA1A/FCN1	39	EOPE	EOPE	62.9032
GO:0035249	synaptic transmission, glutamatergic	35/3067	92/18723	4.68368e-07	4.09855e-05	3.2935e-05	STXBP1/RELN/EGFR/GRIK1/GRM5/NRXN1/GRM1/EXT1/UNC13B/PRKN/NPY2R/P2RX1/UNC13A/ATP1A2/NTRK1/CACNG4/GRIK4/CLSTN3/TNR/CNR1/GRM7/CDK5/PLA2G6/DGKI/DRD2/NLGN3/GRID1/GRIK5/DRD3/GRM6/ROR2/GRIK3/CNIH3/CACNG3/GRM2	35	LOPE	LOPE	38.0435
GO:0086001	cardiac muscle cell action potential	28/3067	76/18723	1.30267e-05	0.000574007	0.00046126	ANK2/SCN5A/CACNA1D/KCNJ2/SCN4B/KCNQ1/NOS1AP/KCNJ5/ATP1A2/CACNA1C/KCND3/SCN10A/SCN3B/ATP2A2/CACNA1G/KCNA5/ATP1A1/CAV3/GJA1/CACNB2/JUP/GJA5/SCN1B/CAV1/GPD1L/HCN4/PKP2/BIN1	28	LOPE	LOPE	36.8421
GO:0099622	cardiac muscle cell membrane repolarization	15/3067	38/18723	0.000561404	0.00979945	0.00787462	ANK2/SCN5A/CACNA1D/KCNJ2/SCN4B/KCNQ1/NPPA/NOS1AP/KCNJ5/KCND3/KCNA5/ATP1A1/CAV3/GJA5/SCN1B	15	LOPE	LOPE	39.4737
GO:0038084	vascular endothelial growth factor signaling pathway	17/3067	49/18723	0.00138388	0.0193885	0.0155802	NRP2/KDR/XDH/SPRY2/IL12B/PDGFRA/FLT4/HRG/JCAD/VEGFA/PDGFRB/DLL1/CCBE1/MIR342/MYO1C/CD63/PIK3CD	17	LOPE	LOPE	34.6939
GO:1904645	response to amyloid-beta	18/3067	56/18723	0.00269795	0.0310414	0.0249442	GRM5/IGF1R/PARP1/ABCC1/MMP2/TREM2/FCGR2B/CACNA1B/RAMP3/MIR200A/MIR140/CDK5/EPHA4/PRNP/GJA1/LCN2/FPR2/LRP1	18	LOPE	LOPE	32.1429
The ratio (%) was calculated by dividing the number of transcripts involved in each biological process of interest by the total number of transcripts described in the pathway.
