# Supplementary material for: Maternal Plasma Cell-Free RNA as a Predictor of Early and Late-Onset Preeclampsia Throughout Pregnancy
Source: Research Square preprint supplement (doi:10.21203/rs.3.rs-5684050/v1), 2025-01-16
Supplement: Supplementary file 6 [file eb91744109eeb7a51392d518.xlsx]

## Sheet: Supplementary Table 6
Table S6. Summary of predictive model performance metrics for early-onset preeclampsia and late-onset preeclampsia during the first and second trimesters of pregnancy. The 95% confidence intervals are shown in square brackets.
Preeclampsia subtype	Dataset	Cases (n)	Controls (n)	Sensitivity (%)	Specificity (%)	Accuracy (%)	F1-Score (%)	AUC (%)
First trimester predictive models
EOPE	Discovery	29	51	80 [76-84]	90 [88-92]	89 [87-91]	83 [80-86]	86 [84-88]
	Validation	12	24	83 [62-100]	88 [75-100]	86 [75-97]	80 [61-98]	85 [73-98]
LOPE	Discovery	30	51	73 [70-76]	83 [80-84]	72 [69-75]	64 [60-68]	71 [68-73]
	Validation	13	24	69 [44-95]	67 [48-85]	67 [52-83]	59 [37-80]	68 [52-84]
Second trimester predictive models
EOPE	Discovery	25	54	81 [75-87]	94 [92-96]	79 [77-81]	65 [60-70]	79 [76-82]
	Validation	15	19	87 [69-100]	84 [67-100]	85 [73-97]	84 [69-98]	85 [73-97]
LOPE	Discovery	34	45	78 [73-83]	87 [84-90]	84 [81-87]	78 [74-82]	83 [80-86]
	Validation	7	28	86 [58-100]	89 [78-100]	89 [78-100]	75 [48-100]	88 [72-100]
