# Supplementary material for: Maternal Plasma Cell-Free RNA as a Predictor of Early and Late-Onset Preeclampsia Throughout Pregnancy
Source: Research Square preprint supplement (doi:10.21203/rs.3.rs-5684050/v1), 2025-01-16
Supplement: Supplementary file 7 [file f3ab4ad34f7d464e83b850d7.xlsx]

## Sheet: Supplementary Table 2
Table S2. Differentially abundant cfRNA transcripts at diagnosis in early-onset preeclampsia patients compared to normotensive controls.
cfRNA	Log2FC	P.Value	adj.P.Val
ENSG00000270442	1.39973	1.95718e-15	4.04051e-11
ENSG00000279434	1.64705	3.57402e-15	4.04051e-11
ENSG00000291169	1.09708	4.3546e-15	4.04051e-11
EIF3JP2	1.42637	6.84513e-15	4.04051e-11
ENSG00000258358	1.5863	6.99719e-15	4.04051e-11
ENSG00000219553	1.17714	8.82402e-15	4.04051e-11
ENSG00000239696	1.43251	1.12155e-14	4.04051e-11
ENSG00000214719	1.46901	1.14466e-14	4.04051e-11
CACYBPP2	0.933526	1.2054e-14	4.04051e-11
EIF4A2P2	1.48669	1.37515e-14	4.05747e-11
FAM133EP	1.43699	1.57041e-14	4.05747e-11
ENSG00000230987	1.34411	1.71704e-14	4.05747e-11
ZNF791	0.540351	1.74845e-14	4.05747e-11
PABPC1P6	1.4237	2.79993e-14	6.03346e-11
CCT6P3	1.08995	3.11088e-14	6.2566e-11
ENSG00000279039	1.65917	3.61905e-14	6.75113e-11
CENPCP1	1.08765	3.80434e-14	6.75113e-11
MIPEPP1	1.27417	4.04524e-14	6.77982e-11
RPL7P8	1.13082	4.45253e-14	6.80737e-11
HSPE1P16	1.56278	4.59032e-14	6.80737e-11
ADAM3B	1.26482	4.73862e-14	6.80737e-11
ENSG00000287277	1.55254	5.90635e-14	7.93521e-11
RBM48P1	1.10352	6.04978e-14	7.93521e-11
FRG1FP	1.24729	6.5599e-14	8.2458e-11
BCAS2P1	1.45164	7.09242e-14	8.55856e-11
ENSG00000293343	1.13234	7.80404e-14	8.67092e-11
ENSG00000255065	1.35099	7.99172e-14	8.67092e-11
SRD5A3	1.16032	8.10197e-14	8.67092e-11
RPL26P27	1.44545	8.45415e-14	8.67092e-11
ENSG00000229817	1.15321	8.92969e-14	8.67092e-11
DPY19L4P2	1.38873	9.17968e-14	8.67092e-11
CENPIP1	1.2114	9.37058e-14	8.67092e-11
ENSG00000259619	1.19205	9.49027e-14	8.67092e-11
ENSG00000291142	1.33042	9.78656e-14	8.67092e-11
SVIL-AS1	0.986638	1.00597e-13	8.67092e-11
ENSG00000253336	1.03014	1.06267e-13	8.7745e-11
PGGT1BP1	1.07142	1.10736e-13	8.7745e-11
ENSG00000270691	1.42551	1.16587e-13	8.7745e-11
ST13P21	1.1726	1.19149e-13	8.7745e-11
RPL5P34	0.883382	1.19224e-13	8.7745e-11
API5P2	0.976355	1.1925e-13	8.7745e-11
SETP1	1.26105	1.27016e-13	9.08142e-11
ENSG00000253993	1.39133	1.29442e-13	9.08142e-11
ENSG00000249101	1.24842	1.33321e-13	9.14099e-11
ENSG00000261278	1.75168	1.5504e-13	1.01462e-10
RPL7L1P4	1.18049	1.6012e-13	1.01462e-10
GTF2IP23	1.23392	1.62338e-13	1.01462e-10
ME2P1	1.01489	1.64237e-13	1.01462e-10
ANKRD11P1	0.784676	1.7956e-13	1.01462e-10
DSTNP5	1.47852	1.81091e-13	1.01462e-10
ZNF101P2	0.962316	1.84054e-13	1.01462e-10
DOCK11P1	0.968987	1.85814e-13	1.01462e-10
ENSG00000257611	0.915537	1.87632e-13	1.01462e-10
ENSG00000214883	1.27092	1.9063e-13	1.01462e-10
ABCC2	-0.285028	1.92221e-13	1.01462e-10
CENPUP1	1.74147	1.95086e-13	1.01462e-10
ENSG00000261208	1.1389	2.05146e-13	1.01462e-10
RPS3AP13	1.20988	2.0785e-13	1.01462e-10
ENSG00000291178	0.690323	2.0833e-13	1.01462e-10
ENSG00000254162	1.78213	2.09645e-13	1.01462e-10
HSFY1P1	1.70942	2.11364e-13	1.01462e-10
FRG1DP	1.16312	2.12551e-13	1.01462e-10
KCTD9P1	0.975582	2.13232e-13	1.01462e-10
RPL22P13	1.54053	2.15248e-13	1.01462e-10
ENSG00000254702	1.18744	2.32577e-13	1.07904e-10
FAM133FP	1.18386	2.39056e-13	1.07904e-10
RPS3AP35	1.17388	2.39644e-13	1.07904e-10
ENSG00000181514	1.26317	2.56326e-13	1.12453e-10
ABCA4	-0.460115	2.58227e-13	1.12453e-10
SSBL5P	1.2823	2.64287e-13	1.12453e-10
RAD17P1	0.966461	2.67264e-13	1.12453e-10
ENSG00000270614	1.51018	2.68385e-13	1.12453e-10
ANKRD30BP3	1.8144	2.86774e-13	1.18249e-10
ENSG00000226280	1.20475	2.90058e-13	1.18249e-10
ICE2P1	0.955744	2.9903e-13	1.18959e-10
OIP5-AS1	1.1545	2.9989e-13	1.18959e-10
CCSER2P1	1.52808	3.03627e-13	1.18959e-10
RAD54L	-0.494663	3.15685e-13	1.21544e-10
DEPDC1P2	1.06483	3.18282e-13	1.21544e-10
RNFT1P3	1.061	3.23439e-13	1.21969e-10
CDC27P3	1.08957	3.43671e-13	1.25021e-10
ENSG00000251478	1.13024	3.46081e-13	1.25021e-10
SGK3	1.3056	3.49543e-13	1.25021e-10
ICE2P2	1.20894	3.5533e-13	1.25021e-10
ENSG00000226636	1.60063	3.5568e-13	1.25021e-10
ENSG00000283399	0.984897	3.56398e-13	1.25021e-10
ENSG00000291100	1.18726	3.61901e-13	1.25147e-10
ENSG00000250860	1.0377	3.65053e-13	1.25147e-10
ENSG00000267490	1.13083	3.73706e-13	1.26546e-10
TLK1P1	1.01102	3.77524e-13	1.26546e-10
MAPK6P4	1.02831	3.88494e-13	1.27956e-10
TRIM77BP	0.756646	3.90213e-13	1.27956e-10
RAD51AP1P1	1.32799	4.02047e-13	1.29548e-10
DPY19L4P1	1.2336	4.03655e-13	1.29548e-10
RPL7P59	1.05718	4.17138e-13	1.3009e-10
RPS7P15	1.27391	4.18816e-13	1.3009e-10
ENSG00000265136	1.41004	4.22285e-13	1.3009e-10
BOLA3P2	1.22403	4.22595e-13	1.3009e-10
HSP90AA4P	1.28139	4.42211e-13	1.33364e-10
RNF14P1	1.08222	4.44663e-13	1.33364e-10
KMT2CP4	0.70895	4.46491e-13	1.33364e-10
ENSG00000263682	1.5731	4.52969e-13	1.33501e-10
DNAJB6P4	1.24629	4.55802e-13	1.33501e-10
SNX6P1	1.36044	4.65844e-13	1.35131e-10
RPL7P16	1.31569	4.80519e-13	1.37103e-10
DDX18P1	1.16962	4.81733e-13	1.37103e-10
GXYLT1P2	1.37577	5.06386e-13	1.40473e-10
CBX3P1	1.57116	5.09312e-13	1.40473e-10
RPL7P25	1.15608	5.11749e-13	1.40473e-10
ZNF320	0.661907	5.15142e-13	1.40473e-10
ETF1P2	0.96256	5.1777e-13	1.40473e-10
ENSG00000253262	1.46372	5.21511e-13	1.40473e-10
SSBL3P	1.40367	5.30168e-13	1.40493e-10
TFGP1	1.18656	5.32491e-13	1.40493e-10
FRG1GP	1.23447	5.35558e-13	1.40493e-10
ZNF37BP	1.09894	5.44372e-13	1.40497e-10
LARP1BP1	1.19433	5.44886e-13	1.40497e-10
RPL5P6	0.971958	5.50419e-13	1.40721e-10
RPS3AP25	0.877547	5.74409e-13	1.4562e-10
MAP2K4P1	0.782069	5.97747e-13	1.50274e-10
ENSG00000268455	1.15103	6.40018e-13	1.5876e-10
ARMC8P1	1.13976	6.4203e-13	1.5876e-10
ENSG00000253667	1.34244	6.58814e-13	1.60925e-10
PRELID3BP10	0.650966	6.69536e-13	1.60925e-10
CUBNP1	0.816099	6.72383e-13	1.60925e-10
CIR1P2	1.38261	6.72384e-13	1.60925e-10
HSP90AA5P	1.01602	6.7805e-13	1.60925e-10
CYLD-AS1	1.11836	6.82788e-13	1.60925e-10
RSL24D1P9	1.13046	6.90841e-13	1.6156e-10
ENSG00000225923	1.29749	7.11975e-13	1.65222e-10
RPS3AP14	1.28643	7.32624e-13	1.68716e-10
SEPTIN7P1	1.43411	7.4383e-13	1.6995e-10
ZNF90P1	0.957619	7.49248e-13	1.6995e-10
FRG1JP	1.23514	7.64472e-13	1.72109e-10
SLC35E3	0.628869	7.76378e-13	1.73495e-10
RPS7P7	1.54104	8.10108e-13	1.78875e-10
NPM1P12	1.11291	8.12315e-13	1.78875e-10
HNRNPA3P15	1.32154	8.46234e-13	1.83862e-10
ENSG00000212989	1.61299	8.4715e-13	1.83862e-10
ENSG00000249006	1.05195	8.59366e-13	1.8416e-10
RPL7P36	1.08508	8.68667e-13	1.8416e-10
ENSG00000291136	1.21877	8.70776e-13	1.8416e-10
RPL7P53	1.57487	8.7294e-13	1.8416e-10
IDI1P1	1.15139	8.99176e-13	1.86676e-10
ZFYVE9P2	1.27403	8.99188e-13	1.86676e-10
DDX18P6	1.12238	9.04445e-13	1.86676e-10
PSMD14P1	1.22647	9.09618e-13	1.86676e-10
TCEA1P3	1.78542	9.79181e-13	1.99594e-10
DBF4P1	0.90743	9.98345e-13	2.02135e-10
GTF2IP14	1.23008	1.03953e-12	2.08171e-10
SSX2IPP1	1.66852	1.04224e-12	2.08171e-10
MIX23P5	1.33622	1.05074e-12	2.08171e-10
SEPTIN7P10	1.44724	1.05576e-12	2.08171e-10
DEPDC1P1	0.841416	1.07862e-12	2.10379e-10
PDCD5P1	1.30859	1.08189e-12	2.10379e-10
ENSG00000254471	1.1212	1.08788e-12	2.10379e-10
PTPN11P3	0.778037	1.10905e-12	2.13107e-10
PARP4P2	0.718355	1.12021e-12	2.13889e-10
ENSG00000267002	1.32271	1.13904e-12	2.14286e-10
ENSG00000215796	1.24073	1.1684e-12	2.14286e-10
PSMC1P8	1.09704	1.17276e-12	2.14286e-10
SLC33A1	1.09442	1.17408e-12	2.14286e-10
ENSG00000237268	1.59182	1.17442e-12	2.14286e-10
EEF1A1P10	0.837633	1.17625e-12	2.14286e-10
SEPTIN14P1	1.03677	1.17667e-12	2.14286e-10
CUL1P1	1.28551	1.17911e-12	2.14286e-10
ENSG00000220685	1.19431	1.18889e-12	2.14768e-10
ZNF702P	0.8484	1.22358e-12	2.1972e-10
AGGF1P2	1.44324	1.23945e-12	2.20772e-10
GTF3AP1	1.69731	1.24634e-12	2.20772e-10
DDX18P4	1.13748	1.2514e-12	2.20772e-10
ZNF33CP	1.20134	1.2616e-12	2.21278e-10
TFAMP1	1.43115	1.27128e-12	2.21689e-10
ATP1B1P1	1.34166	1.2982e-12	2.25081e-10
SSBL4P	1.36552	1.36217e-12	2.3474e-10
USP8P2	1.23092	1.36947e-12	2.3474e-10
ENSG00000283659	0.950802	1.38113e-12	2.35401e-10
LUCAT1	1.46356	1.40735e-12	2.38523e-10
ENSG00000244146	1.343	1.42555e-12	2.38765e-10
G2E3P1	1.01153	1.43139e-12	2.38765e-10
Metazoa_SRP	1.47685	1.44003e-12	2.38765e-10
ENSG00000270553	1.60027	1.44044e-12	2.38765e-10
ENSG00000261549	0.98546	1.46819e-12	2.41702e-10
BBIP1P1	1.35567	1.47968e-12	2.41702e-10
ENSG00000256748	1.0931	1.4822e-12	2.41702e-10
ENSG00000244535	1.3589	1.54276e-12	2.50226e-10
FIRRE	1.27604	1.55219e-12	2.50409e-10
TRPC6P3	1.13703	1.57498e-12	2.52735e-10
SEPTIN7P8	1.15624	1.64346e-12	2.62327e-10
ENSG00000218337	1.23963	1.66156e-12	2.63821e-10
MAPK6P6	1.00896	1.70819e-12	2.68021e-10
GRB10	-0.418937	1.70827e-12	2.68021e-10
MPHOSPH10P1	0.911879	1.71466e-12	2.68021e-10
ENSG00000283294	1.19739	1.7271e-12	2.68573e-10
USP8P1	0.900343	1.74922e-12	2.69766e-10
ENSG00000271919	1.48917	1.75266e-12	2.69766e-10
TPTEP1	1.1347	1.79637e-12	2.75091e-10
NCAPGP1	1.3269	1.84666e-12	2.81363e-10
PCAT1	1.34867	1.88165e-12	2.85255e-10
SNX14	0.780723	1.94236e-12	2.92985e-10
NOPCHAP1	0.632888	1.96861e-12	2.95467e-10
VPS26AP1	1.31191	1.98433e-12	2.96352e-10
ENSG00000224155	0.913139	1.99501e-12	2.96479e-10
ENSG00000228132	1.30444	2.01522e-12	2.98016e-10
SUGT1P1	1.14122	2.08022e-12	3.06128e-10
GOLGA5P1	1.03547	2.10174e-12	3.06308e-10
ENSG00000259413	1.7755	2.10176e-12	3.06308e-10
LINC01694	1.49288	2.11667e-12	3.06998e-10
ASNSP1	1.18554	2.12927e-12	3.07349e-10
HSPD1P10	1.18642	2.16095e-12	3.10435e-10
CNGA3	-0.640274	2.22911e-12	3.18651e-10
NOTCH2	-0.442198	2.23926e-12	3.18651e-10
SDAD1P1	0.94152	2.27417e-12	3.2121e-10
XDH	-0.525384	2.27854e-12	3.2121e-10
COX11P1	1.02391	2.29683e-12	3.22282e-10
FANCA	-0.430005	2.34003e-12	3.26825e-10
PHF8	-0.434872	2.37871e-12	3.28056e-10
ENSG00000256799	1.32348	2.38174e-12	3.28056e-10
PTPN2P2	0.90294	2.38678e-12	3.28056e-10
DLEU2	1.50086	2.39498e-12	3.28056e-10
ENSG00000251313	1.09893	2.40584e-12	3.28056e-10
ENSG00000253153	1.3374	2.42144e-12	3.28056e-10
NFYBP1	0.899735	2.42897e-12	3.28056e-10
RPL7P44	1.08522	2.45017e-12	3.28056e-10
HNRNPRP1	0.757472	2.45345e-12	3.28056e-10
ENSG00000278531	1.08946	2.45911e-12	3.28056e-10
ENSG00000214278	0.955595	2.46847e-12	3.28056e-10
NPY2R	-0.512954	2.50325e-12	3.31219e-10
RPL26P13	1.39651	2.52139e-12	3.32163e-10
RPS3AP4	1.63563	2.56347e-12	3.35349e-10
ITGA9	-0.438595	2.57495e-12	3.35349e-10
ENSG00000278205	1.14999	2.58149e-12	3.35349e-10
DNAI1	-0.552016	2.60575e-12	3.35349e-10
NIFKP1	1.37615	2.60902e-12	3.35349e-10
PLS1P1	1.219	2.61227e-12	3.35349e-10
RNPC3P1	0.958707	2.65424e-12	3.39293e-10
ENSG00000234586	1.49365	2.69183e-12	3.39308e-10
RPL5P30	0.841673	2.69826e-12	3.39308e-10
SNRPD1	0.594941	2.70265e-12	3.39308e-10
OSBPL9P4	1.53921	2.70594e-12	3.39308e-10
CCT6P2	0.880002	2.72125e-12	3.39308e-10
ENSG00000224245	1.39337	2.72184e-12	3.39308e-10
CASP3P1	1.25355	2.74085e-12	3.40272e-10
CUBNP3	0.774706	2.7578e-12	3.40953e-10
DDX18P5	1.06788	2.76894e-12	3.40953e-10
RPL7P18	1.3452	2.79636e-12	3.42929e-10
DDX18P3	0.759342	2.82338e-12	3.44841e-10
MAPK6P3	0.963426	2.86392e-12	3.48382e-10
ENSG00000259601	1.19137	2.9217e-12	3.49272e-10
RAP1BP1	0.848593	2.9257e-12	3.49272e-10
BDP1P	1.15838	2.92601e-12	3.49272e-10
IMMP1L	0.694758	2.93007e-12	3.49272e-10
BCS1L	-0.597429	2.94916e-12	3.49272e-10
ENSG00000283431	1.30433	2.95462e-12	3.49272e-10
RPS3AP53	1.0611	2.95775e-12	3.49272e-10
LINC02861	1.74973	2.96386e-12	3.49272e-10
GLB1	-0.455846	2.98076e-12	3.49897e-10
RPL21P103	1.15956	3.0331e-12	3.54626e-10
AIMP1P1	1.15062	3.04455e-12	3.54626e-10
GALNT12	-0.46704	3.06342e-12	3.55452e-10
DPPA2P2	0.882053	3.08079e-12	3.56097e-10
OR5H4P	1.41298	3.12254e-12	3.57562e-10
RLIG1P1	1.37722	3.12365e-12	3.57562e-10
RSL24D1P11	1.35021	3.12903e-12	3.57562e-10
THAP12P2	0.962525	3.17096e-12	3.60439e-10
OSBPL9P2	1.26644	3.18939e-12	3.60439e-10
RPL5P18	0.949764	3.19004e-12	3.60439e-10
ABRAXAS1P2	0.793547	3.21287e-12	3.61663e-10
ENSG00000253500	1.87821	3.24901e-12	3.64372e-10
ENSG00000228191	1.39791	3.28476e-12	3.66293e-10
TMED2-DT	1.59988	3.29042e-12	3.66293e-10
EIF3LP1	0.970701	3.30661e-12	3.66741e-10
ENSG00000237472	1.22693	3.33143e-12	3.67457e-10
ENSG00000242295	1.01407	3.33741e-12	3.67457e-10
DUXAP6	1.29782	3.41403e-12	3.74525e-10
SLFNL1-AS1	1.45155	3.49452e-12	3.81966e-10
PNPT1P1	1.09176	3.50819e-12	3.82076e-10
NPR2	-0.543989	3.54765e-12	3.84984e-10
KHDC1-AS1	1.32508	3.57327e-12	3.86374e-10
ENSG00000218586	0.879865	3.61889e-12	3.8855e-10
TMEM69P1	1.24982	3.61915e-12	3.8855e-10
RPS7P8	1.48775	3.70005e-12	3.95826e-10
RPL6P2	1.16041	3.72081e-12	3.95978e-10
MORF4L1P3	0.962174	3.73736e-12	3.95978e-10
SFR1P2	1.43505	3.74084e-12	3.95978e-10
RPL7P20	1.1608	3.80866e-12	4.01747e-10
ELF2P3	1.1403	3.82793e-12	4.02372e-10
ENSG00000220949	1.19403	3.90649e-12	4.09205e-10
ENSG00000213121	1.59586	3.96726e-12	4.1191e-10
ENSG00000231525	1.33593	3.97702e-12	4.1191e-10
CEMIP	-0.542763	3.98461e-12	4.1191e-10
EIF4A2P3	1.49752	4.00335e-12	4.1191e-10
FANCG	-0.667324	4.0119e-12	4.1191e-10
ENSG00000290812	0.687129	4.01424e-12	4.1191e-10
MSL3P3	1.25488	4.05343e-12	4.13729e-10
WHSC1L2P	0.966449	4.05939e-12	4.13729e-10
ENSG00000227058	1.10109	4.10055e-12	4.16284e-10
RAP1BP2	1.76174	4.11206e-12	4.16284e-10
NPM1P36	1.39591	4.15077e-12	4.18797e-10
ANKRD18DP	1.1685	4.23404e-12	4.25775e-10
ENSG00000249068	1.26714	4.26649e-12	4.27037e-10
HAUS6P2	1.44913	4.27518e-12	4.27037e-10
RPL7P55	1.75138	4.30266e-12	4.27037e-10
NAP1L4P3	1.11163	4.30321e-12	4.27037e-10
ENSG00000255540	0.657038	4.32022e-12	4.27319e-10
ENSG00000244266	1.15038	4.37998e-12	4.30764e-10
ALDH7A1P3	1.50686	4.39586e-12	4.30764e-10
DNAJC8P3	1.30832	4.39788e-12	4.30764e-10
C2orf69P3	1.51151	4.41356e-12	4.309e-10
HSPD1P9	1.18017	4.44196e-12	4.32275e-10
RDM1P3	1.38756	4.48127e-12	4.34697e-10
PCNPP1	1.1791	4.55676e-12	4.40604e-10
SP3P	0.85268	4.63138e-12	4.46388e-10
IL2RA	-0.560924	4.66121e-12	4.47832e-10
FGF7P1	1.29174	4.73357e-12	4.53341e-10
ANP32BP3	1.05302	4.75316e-12	4.53777e-10
FAM133GP	1.72024	4.76961e-12	4.5391e-10
ENSG00000232027	1.15653	4.78809e-12	4.54236e-10
LINC00506	1.68385	4.87425e-12	4.59322e-10
RPF2P1	0.848584	4.88472e-12	4.59322e-10
ENSG00000264289	1.70032	4.8915e-12	4.59322e-10
TMPOP2	0.972376	4.90261e-12	4.59322e-10
CALM1P2	1.42987	4.92484e-12	4.59977e-10
TET1P1	1.04855	4.94987e-12	4.60687e-10
ENSG00000256625	0.736092	4.96298e-12	4.60687e-10
DDX11	-0.734935	4.97874e-12	4.60732e-10
SNRNP200	-0.510975	5.0215e-12	4.61867e-10
NOX4P1	1.0424	5.02163e-12	4.61867e-10
PTPN11P1	0.703998	5.04436e-12	4.62548e-10
TRNT1P1	1.49463	5.16616e-12	4.72281e-10
TSTD3	1.10201	5.3142e-12	4.84149e-10
TLK2P2	0.814497	5.35313e-12	4.84149e-10
ENSG00000250703	1.28969	5.35981e-12	4.84149e-10
MATR3P2	1.25614	5.36017e-12	4.84149e-10
RPS3AP43	0.948433	5.39898e-12	4.84902e-10
ENSG00000288694	0.844155	5.40065e-12	4.84902e-10
FRAS1	-0.297062	5.42479e-12	4.85585e-10
EIF5P1	0.970882	5.44046e-12	4.85585e-10
ENSG00000259531	0.929109	5.46717e-12	4.8653e-10
ADH5P3	0.749831	5.51594e-12	4.89426e-10
ENSG00000226241	1.2089	5.72082e-12	5.04731e-10
RPL21P57	1.11389	5.7219e-12	5.04731e-10
ENSG00000234639	1.42457	5.74268e-12	5.05088e-10
LINC02043	1.20993	5.7721e-12	5.062e-10
VPS26BP1	1.47706	5.82159e-12	5.0906e-10
ENSG00000225402	0.856373	5.84057e-12	5.0917e-10
SHROOM4	-0.450339	5.85661e-12	5.0917e-10
ENSG00000283269	1.4904	5.87705e-12	5.09479e-10
ENSG00000248827	0.899986	5.9045e-12	5.10392e-10
ENSG00000226965	1.25784	6.04461e-12	5.19996e-10
METAP2P1	1.27682	6.05007e-12	5.19996e-10
EXOC5P1	0.931635	6.20629e-12	5.31907e-10
ENSG00000232546	1.79964	6.25263e-12	5.33006e-10
ENSG00000248452	1.30613	6.25444e-12	5.33006e-10
MMADHCP2	1.00583	6.34251e-12	5.38988e-10
ENSG00000275419	1.70337	6.36378e-12	5.39277e-10
ACTR3P2	1.03111	6.39626e-12	5.40511e-10
TRPM1	-0.268836	6.4305e-12	5.41887e-10
ENSG00000253991	1.48275	6.46017e-12	5.4287e-10
OR5M4P	1.0987	6.54915e-12	5.43868e-10
LDHBP2	0.944821	6.55644e-12	5.43868e-10
OR5H5P	0.986439	6.55727e-12	5.43868e-10
KIF5A	-0.468028	6.56184e-12	5.43868e-10
MAPK6P2	1.06397	6.56218e-12	5.43868e-10
ENSG00000213650	0.981125	6.69413e-12	5.53283e-10
Y_RNA	1.37952	6.73346e-12	5.53547e-10
ENSG00000259632	1.0719	6.75093e-12	5.53547e-10
LCT	-0.456994	6.75236e-12	5.53547e-10
TATDN1P1	0.976249	6.85468e-12	5.59365e-10
AGGF1P3	1.46926	6.86042e-12	5.59365e-10
RPS3AP19	1.02299	6.96154e-12	5.66081e-10
TPT1P4	1.18771	7.15199e-12	5.79507e-10
ENSG00000237317	1.58899	7.16508e-12	5.79507e-10
ENSG00000251204	0.88393	7.26187e-12	5.85765e-10
ENSG00000215871	1.0044	7.30275e-12	5.86278e-10
ZNF680P1	1.27681	7.31249e-12	5.86278e-10
ENSG00000259231	1.49074	7.34612e-12	5.86278e-10
CTDSPL2P1	1.10034	7.36713e-12	5.86278e-10
CTDSPL2P2	2.07789	7.38127e-12	5.86278e-10
C2orf69P1	1.64365	7.38483e-12	5.86278e-10
ENSG00000279278	1.61091	7.51911e-12	5.95372e-10
ENSG00000219487	0.78086	7.62568e-12	6.0011e-10
AMD1P4	1.27739	7.63087e-12	6.0011e-10
EIF4A2P1	1.02551	7.63864e-12	6.0011e-10
AMPD3	-0.561469	7.7206e-12	6.04974e-10
ELOC	0.848346	7.78128e-12	6.07294e-10
NIFKP3	1.18324	7.79047e-12	6.07294e-10
CASP4LP	1.28469	7.87651e-12	6.12166e-10
TWF1P2	1.00139	7.89355e-12	6.12166e-10
ENSG00000225871	0.697329	8.02556e-12	6.20808e-10
PABPC1P4	0.628858	8.09726e-12	6.23444e-10
CD46P1	0.843621	8.11318e-12	6.23444e-10
IMMP1LP2	1.39404	8.12164e-12	6.23444e-10
ENSG00000234784	1.23348	8.27386e-12	6.33517e-10
ENSG00000266818	0.900688	8.29506e-12	6.33533e-10
PRKAR1AP1	1.11055	8.32235e-12	6.34012e-10
TMA16P1	1.28318	8.35921e-12	6.35215e-10
CBX3P9	1.04631	8.40062e-12	6.35544e-10
TG	-0.482653	8.40566e-12	6.35544e-10
ZNF75BP	1.20303	8.42737e-12	6.35592e-10
ENSG00000224785	1.05462	8.49861e-12	6.39367e-10
ENSG00000278543	1.21883	8.53209e-12	6.40289e-10
RFPL3S	0.647965	8.57459e-12	6.4098e-10
SDAD1P2	0.879305	8.5838e-12	6.4098e-10
ENSG00000259677	1.6065	8.71259e-12	6.48991e-10
HSPD1P6	0.819556	8.79731e-12	6.52854e-10
RUBCN	-0.534706	8.80773e-12	6.52854e-10
PRPF8	-0.499683	8.85808e-12	6.54977e-10
RPS3AP11	1.37378	8.93872e-12	6.57162e-10
TNFRSF10B	-0.425346	8.94233e-12	6.57162e-10
ENSG00000241179	1.48878	8.95298e-12	6.57162e-10
BRDTP1	1.48693	9.01767e-12	6.57323e-10
PGGT1BP2	0.835643	9.04002e-12	6.57323e-10
LINC01418	1.28183	9.04412e-12	6.57323e-10
ENSG00000254564	1.8144	9.0457e-12	6.57323e-10
RCC1L	-0.581033	9.06412e-12	6.57323e-10
ENSG00000233787	1.32433	9.10563e-12	6.5875e-10
ATP5F1CP1	0.603464	9.22404e-12	6.6572e-10
MRPL42	0.75765	9.31288e-12	6.66753e-10
DDX3P3	0.978179	9.32338e-12	6.66753e-10
RPL21P112	1.87329	9.32421e-12	6.66753e-10
ENSG00000275598	1.40906	9.32676e-12	6.66753e-10
MRE11P1	0.848696	9.36607e-12	6.6798e-10
SAGE4P	1.03835	9.39503e-12	6.68465e-10
RPL5P24	1.09918	9.49737e-12	6.74157e-10
CDC42	0.952765	9.52258e-12	6.7436e-10
ENSG00000291063	0.849806	9.67121e-12	6.83281e-10
WWP1P1	0.746673	9.70261e-12	6.83366e-10
LINC-PINT	1.41707	9.71771e-12	6.83366e-10
KRBOX5P1	1.18137	9.74966e-12	6.84018e-10
SINHCAFP3	1.41743	9.79957e-12	6.85924e-10
ENSG00000232337	1.44215	9.82736e-12	6.86277e-10
ENSG00000259931	1.41478	9.88777e-12	6.88901e-10
ENSG00000285582	1.33974	9.94271e-12	6.91133e-10
CCNB1IP1P3	1.59363	1.00901e-11	6.98475e-10
LRP4	-0.65579	1.01116e-11	6.98475e-10
FRG1EP	1.49146	1.01178e-11	6.98475e-10
SEPTIN7P11	0.9277	1.01586e-11	6.99688e-10
ENSG00000231615	1.19512	1.02069e-11	7.01413e-10
ENSG00000240174	1.09385	1.03068e-11	7.06669e-10
EEF1A1P38	1.18714	1.03549e-11	7.08363e-10
ABCA1	-0.345704	1.03827e-11	7.08658e-10
RPS3AP54	1.42602	1.04109e-11	7.08976e-10
ENSG00000293110	1.45865	1.04537e-11	7.10289e-10
LAMC2	-0.397688	1.06032e-11	7.18828e-10
NAP1L1P3	0.978947	1.06762e-11	7.22151e-10
UGT1A13P	0.935607	1.07869e-11	7.28005e-10
MTFR2P2	1.53661	1.08358e-11	7.29677e-10
YES1P1	0.838397	1.08813e-11	7.31104e-10
ZNF731P	0.840769	1.09581e-11	7.34634e-10
ENSG00000257564	1.38401	1.09843e-11	7.34754e-10
SRP72P1	0.90562	1.10689e-11	7.38778e-10
POGLUT2P1	0.965391	1.11197e-11	7.4039e-10
PPP4R2P1	0.766172	1.11552e-11	7.4039e-10
RRN3P4	1.46414	1.11667e-11	7.4039e-10
GXYLT1P7	1.3587	1.12402e-11	7.42379e-10
TSEN2P1	1.0121	1.12459e-11	7.42379e-10
RPL12P31	1.20828	1.13701e-11	7.48937e-10
HSPA8P4	1.12398	1.15563e-11	7.59543e-10
ENSG00000230284	1.07865	1.16293e-11	7.61934e-10
MTIF2P1	1.2266	1.16578e-11	7.61934e-10
PDSS1P1	0.738583	1.16684e-11	7.61934e-10
PFKM	-0.472298	1.17257e-11	7.64017e-10
YWHAEP7	1.25742	1.17889e-11	7.66483e-10
ENSG00000263189	0.929234	1.18175e-11	7.66686e-10
MFSD1P1	1.23268	1.19356e-11	7.72689e-10
ENSG00000258578	1.29702	1.20434e-11	7.77241e-10
CKAP2P1	1.34006	1.20574e-11	7.77241e-10
SC4MOP	1.69371	1.21059e-11	7.787e-10
NPM1P30	1.29048	1.21489e-11	7.79804e-10
ENSG00000273860	0.993624	1.22108e-11	7.8211e-10
ENSG00000225236	1.3908	1.22396e-11	7.82294e-10
MFFP1	1.33176	1.25191e-11	7.97053e-10
MSANTD2-AS1	1.55834	1.25317e-11	7.97053e-10
ENSG00000266365	0.819759	1.25531e-11	7.97053e-10
OR5H7P	0.972014	1.25762e-11	7.97053e-10
ENSG00000254939	0.970691	1.26596e-11	8.00259e-10
COP1P1	0.891202	1.26798e-11	8.00259e-10
ENSG00000233388	1.14973	1.2741e-11	8.02442e-10
SEPTIN7P3	0.997166	1.28822e-11	8.09647e-10
RPL35AP19	1.14846	1.30668e-11	8.17419e-10
KIAA1143P2	1.61127	1.30715e-11	8.17419e-10
TAS2R63P	1.25633	1.30872e-11	8.17419e-10
SPOPLP1	1.27995	1.31284e-11	8.18304e-10
NPM1P40	1.01573	1.3281e-11	8.24833e-10
ENSG00000249743	1.68626	1.32879e-11	8.24833e-10
SERPINA6	-0.571243	1.33516e-11	8.268e-10
PENK-AS1	1.75691	1.33744e-11	8.268e-10
ENSG00000286141	1.73122	1.34349e-11	8.27944e-10
ENSG00000285986	1.06812	1.34655e-11	8.27944e-10
NPM1P29	1.22093	1.34984e-11	8.27944e-10
ENSG00000231317	1.56343	1.35027e-11	8.27944e-10
NFE2L3P1	0.733708	1.3599e-11	8.32159e-10
YWHAZP1	1.74113	1.36411e-11	8.32312e-10
RPS27AP7	1.23027	1.36567e-11	8.32312e-10
ABRAXAS1P1	1.19898	1.3686e-11	8.32416e-10
COG4	-0.382716	1.37234e-11	8.33012e-10
OLMALINC	1.65718	1.38352e-11	8.38111e-10
RPL24P6	1.0307	1.39535e-11	8.43587e-10
RAD17P2	1.42808	1.40646e-11	8.452e-10
ENSG00000272840	1.21781	1.40945e-11	8.452e-10
ARF4P1	0.842577	1.41009e-11	8.452e-10
HNRNPA1P54	0.76282	1.41333e-11	8.452e-10
NPM1P34	1.05551	1.41685e-11	8.452e-10
RPS7P5	1.48007	1.41698e-11	8.452e-10
ENSG00000287109	1.67152	1.41766e-11	8.452e-10
LINC02607	1.92501	1.42175e-11	8.452e-10
PSMA1P1	0.850912	1.42323e-11	8.452e-10
HADHAP1	0.813904	1.43296e-11	8.48667e-10
NPM1P41	1.45937	1.4347e-11	8.48667e-10
STS	-0.435615	1.45366e-11	8.57856e-10
TMF1P1	1.43156	1.46008e-11	8.57856e-10
HNRNPA3P9	1.09558	1.46132e-11	8.57856e-10
LARP4P	0.839836	1.46161e-11	8.57856e-10
SCYL2P1	0.900122	1.48553e-11	8.68806e-10
AGGF1P4	1.70349	1.48785e-11	8.68806e-10
DNAJC19P1	1.00412	1.4889e-11	8.68806e-10
NRSN2-AS1	1.48271	1.49443e-11	8.6949e-10
ZNG1C	1.08977	1.49584e-11	8.6949e-10
RPS3AP48	1.15319	1.51106e-11	8.76645e-10
GTF2F2P1	1.32494	1.52027e-11	8.79529e-10
NPM1P47	1.4561	1.52186e-11	8.79529e-10
CCDC26	1.62559	1.52661e-11	8.79766e-10
RPL37P25	1.67386	1.5281e-11	8.79766e-10
NCF2	-0.434998	1.539e-11	8.84353e-10
BRD7P4	0.853749	1.54496e-11	8.84792e-10
PSMA3P1	1.28226	1.54563e-11	8.84792e-10
DHX9P1	0.885245	1.55436e-11	8.86929e-10
TPT1-AS1	1.48046	1.55524e-11	8.86929e-10
ENSG00000215567	0.951437	1.57289e-11	8.95298e-10
RPL9P2	0.920295	1.58904e-11	9.02788e-10
WBP11P1	0.90019	1.60662e-11	9.10748e-10
DDR2	-0.363074	1.60908e-11	9.10748e-10
SCN5A	-0.71114	1.61591e-11	9.12899e-10
ENSG00000274253	1.14854	1.62522e-11	9.15236e-10
ITCH	1.08791	1.63003e-11	9.15236e-10
ZNF562	0.521917	1.63212e-11	9.15236e-10
TSIX	1.47652	1.63373e-11	9.15236e-10
TOR1BP1	1.41393	1.63522e-11	9.15236e-10
QRSL1P3	0.65087	1.64888e-11	9.21174e-10
LINC02388	1.61495	1.67377e-11	9.33352e-10
NUP35P1	1.12986	1.68091e-11	9.35605e-10
ZNF891	0.493508	1.69172e-11	9.39884e-10
ENSG00000270449	1.48889	1.7224e-11	9.54248e-10
BZW1P1	0.891426	1.7239e-11	9.54248e-10
GLRA1	-0.459401	1.75391e-11	9.69055e-10
ENSG00000280383	1.51261	1.76487e-11	9.69055e-10
CYCSP11	1.19021	1.76548e-11	9.69055e-10
CABIN1	-0.558759	1.76614e-11	9.69055e-10
ZNF714	0.509431	1.76671e-11	9.69055e-10
BAALC-AS1	1.5009	1.77192e-11	9.70151e-10
EIF2S2P3	0.818579	1.77628e-11	9.70774e-10
HMGB1P13	1.2202	1.78309e-11	9.72736e-10
KANK1P1	1.18651	1.79093e-11	9.74425e-10
SOCS5P3	0.777044	1.79265e-11	9.74425e-10
ENSG00000259381	1.18536	1.80207e-11	9.77785e-10
MRPL3P1	0.544386	1.80836e-11	9.79436e-10
FARSBP1	1.34348	1.82003e-11	9.80875e-10
GTF2IP6	1.19674	1.82251e-11	9.80875e-10
ENSG00000237961	1.24103	1.82481e-11	9.80875e-10
SUGT1P2	0.909407	1.8268e-11	9.80875e-10
MAPK6P1	0.943143	1.82782e-11	9.80875e-10
ZNF876P	0.712691	1.83052e-11	9.80875e-10
HNF4GP1	1.48028	1.83735e-11	9.82787e-10
SLC6A14P1	1.16981	1.84971e-11	9.86584e-10
FAM9CP1	1.68999	1.85099e-11	9.86584e-10
HAL	-0.287285	1.86288e-11	9.90653e-10
ZNF90P3	1.37792	1.86921e-11	9.90653e-10
ENSG00000235400	0.862655	1.87268e-11	9.90653e-10
RPAP2P1	1.25882	1.87413e-11	9.90653e-10
ENSG00000232884	1.60142	1.87504e-11	9.90653e-10
MRPS31P2	1.29348	1.88055e-11	9.91825e-10
GRM1	-0.428863	1.89428e-11	9.96191e-10
FAM221A	0.509676	1.89543e-11	9.96191e-10
ENSG00000257159	0.879493	1.90315e-11	9.98507e-10
ENSG00000223559	0.619365	1.91421e-11	1.00257e-09
NPM1P20	1.56127	1.9261e-11	1.0049e-09
SCN1A-AS1	1.12712	1.92746e-11	1.0049e-09
NPM1P42	1.16443	1.93017e-11	1.0049e-09
ERBB3	-0.477756	1.93199e-11	1.0049e-09
OLA1P3	1.27176	1.94566e-11	1.01027e-09
TMA16P2	1.38838	1.9494e-11	1.01047e-09
MTERF1P1	1.68459	1.96097e-11	1.0133e-09
IMMTP1	0.88209	1.96379e-11	1.0133e-09
TPMTP1	0.867903	1.96494e-11	1.0133e-09
RDXP3	0.711458	1.97945e-11	1.01904e-09
EIF2S2P2	1.09326	1.98835e-11	1.02188e-09
SETP5	1.42236	1.99433e-11	1.02321e-09
ENSG00000225594	1.15034	1.99793e-11	1.02332e-09
XACT	1.54977	2.01097e-11	1.02826e-09
NPM1P22	1.03187	2.03415e-11	1.03693e-09
KARS1P1	0.995024	2.03481e-11	1.03693e-09
ETF1P1	1.0323	2.05086e-11	1.04335e-09
ENSG00000234139	1.56405	2.06495e-11	1.04875e-09
FRG1BP	0.911142	2.07577e-11	1.05247e-09
SLC25A25-AS1	1.6569	2.09125e-11	1.05854e-09
G3BP1	0.379101	2.10939e-11	1.06593e-09
COL17A1	-0.52293	2.11827e-11	1.0683e-09
RLIMP1	1.17641	2.12117e-11	1.0683e-09
ENSG00000257813	1.09412	2.13536e-11	1.07366e-09
ZNF209P	0.845611	2.14249e-11	1.07545e-09
ENSG00000269839	0.920829	2.1524e-11	1.07847e-09
ENSG00000224025	0.862576	2.15565e-11	1.07847e-09
TAS2R15P	0.943883	2.19569e-11	1.09668e-09
NPM1P28	1.3026	2.20103e-11	1.09753e-09
BRD7P3	1.07521	2.22065e-11	1.10399e-09
KLRK1-AS1	1.53315	2.2213e-11	1.10399e-09
MT-ND5	4.24747	2.22988e-11	1.10482e-09
PSMA3-AS1	1.36456	2.23129e-11	1.10482e-09
PTPN11P2	0.744892	2.23396e-11	1.10482e-09
MIR99AHG	0.708591	2.24437e-11	1.10815e-09
DDX3P1	0.897191	2.29495e-11	1.13127e-09
GXYLT1P1	1.43352	2.31373e-11	1.13867e-09
PHKA2	-0.32379	2.31955e-11	1.13968e-09
HSPD1P8	1.47989	2.35889e-11	1.15712e-09
POLR3GP2	1.23858	2.37614e-11	1.16369e-09
ENSG00000271362	1.23802	2.38203e-11	1.16469e-09
TECTA	-0.392551	2.3894e-11	1.1664e-09
MTRF1LP2	1.16173	2.40671e-11	1.17295e-09
TMEM161BP1	0.839076	2.42339e-11	1.17607e-09
ENSG00000219273	1.30655	2.42397e-11	1.17607e-09
RPL21P30	0.904299	2.42514e-11	1.17607e-09
RGS9	-0.35427	2.42983e-11	1.17607e-09
DAP3P2	0.986304	2.43314e-11	1.17607e-09
NPM1P43	1.49064	2.43649e-11	1.17607e-09
SMC1A	-0.517283	2.44389e-11	1.17775e-09
SLC6A5	-0.426117	2.49366e-11	1.19982e-09
ENSG00000225854	1.42094	2.50072e-11	1.2013e-09
RPL7P4	1.1515	2.5104e-11	1.20231e-09
ENSG00000227486	1.2118	2.51079e-11	1.20231e-09
SMSP1	1.19371	2.57132e-11	1.22934e-09
NDUFA5P2	1.67095	2.59556e-11	1.23855e-09
ENSG00000267136	1.37711	2.59879e-11	1.23855e-09
RPL9P16	1.40896	2.61149e-11	1.23919e-09
UBA1	-0.704347	2.61172e-11	1.23919e-09
PPP1R2P2	1.20534	2.61245e-11	1.23919e-09
SH3TC2	-0.397731	2.62251e-11	1.24201e-09
ENSG00000250790	1.72474	2.6297e-11	1.24339e-09
TXNP6	1.09309	2.636e-11	1.24339e-09
JAG1	-0.398273	2.6417e-11	1.24339e-09
ENSG00000236160	1.6518	2.64192e-11	1.24339e-09
RPS7P3	1.13411	2.64917e-11	1.24486e-09
MATR3P3	0.751825	2.67448e-11	1.2548e-09
ENSG00000234352	1.03419	2.68422e-11	1.25742e-09
LINC01902	1.61031	2.69777e-11	1.2618e-09
ENSG00000262999	1.87137	2.70469e-11	1.26302e-09
NTRK3	-0.328758	2.70875e-11	1.26302e-09
MYO5B	-0.444027	2.71302e-11	1.26306e-09
ENSG00000248458	1.04571	2.71731e-11	1.26311e-09
RPL22P8	1.33491	2.74527e-11	1.27414e-09
ENSG00000256626	1.45397	2.75805e-11	1.27662e-09
HNRNPA1P23	0.892932	2.75907e-11	1.27662e-09
DDX6P1	1.08023	2.77202e-11	1.28065e-09
NPM1P10	1.35966	2.79626e-11	1.28987e-09
ENSG00000232906	1.25175	2.81089e-11	1.29256e-09
CDC27P1	0.954966	2.8129e-11	1.29256e-09
TPM4P1	1.23541	2.81496e-11	1.29256e-09
FAR1P1	1.20098	2.81923e-11	1.29256e-09
SLC16A1-AS1	1.43408	2.8261e-11	1.29374e-09
UBE2Q2P2	1.2544	2.84279e-11	1.29824e-09
ENSG00000290565	1.75508	2.84891e-11	1.29824e-09
HMGB1P8	0.91924	2.85252e-11	1.29824e-09
ENSG00000251062	1.23905	2.85313e-11	1.29824e-09
SUCLA2P2	1.26131	2.86442e-11	1.2997e-09
NIFKP4	1.29843	2.86496e-11	1.2997e-09
ENSG00000253499	1.18861	2.87162e-11	1.30077e-09
TPMTP2	1.31554	2.88927e-11	1.3068e-09
BRIX1P1	1.34902	2.91244e-11	1.31531e-09
MRPL30P1	1.07595	2.92042e-11	1.31558e-09
NPM1P37	0.929994	2.9227e-11	1.31558e-09
RPS3AP24	1.72876	2.93327e-11	1.31558e-09
ENSG00000250979	0.65643	2.93341e-11	1.31558e-09
CCDC30	0.492088	2.93485e-11	1.31558e-09
ENSG00000267665	1.343	2.95321e-11	1.31912e-09
RPL7P41	1.32828	2.95701e-11	1.31912e-09
ZNF284	1.62004	2.96012e-11	1.31912e-09
FTX	1.04463	2.96023e-11	1.31912e-09
KIF4CP	0.790184	2.97529e-11	1.32162e-09
ZNF107	0.716364	2.97563e-11	1.32162e-09
LINC02261	1.77235	2.97899e-11	1.32162e-09
CFTRP2	1.25096	3.01296e-11	1.33473e-09
ENSG00000232578	1.24482	3.02289e-11	1.33535e-09
DDX50P2	0.84278	3.02321e-11	1.33535e-09
MED17	0.637025	3.02971e-11	1.33626e-09
CIR1P1	1.16144	3.04844e-11	1.34256e-09
ENSG00000291299	1.45775	3.07384e-11	1.35177e-09
SLC34A2	-0.500351	3.10269e-11	1.36232e-09
ENSG00000286746	1.68679	3.10686e-11	1.36232e-09
ENSG00000267293	0.958187	3.12016e-11	1.36446e-09
HMGB2P1	1.1662	3.12079e-11	1.36446e-09
RPS24P6	1.0615	3.13957e-11	1.37069e-09
OTOA	-0.334244	3.14943e-11	1.37301e-09
LINC03072	1.50907	3.1836e-11	1.3859e-09
PDE6A	-0.287805	3.19008e-11	1.38672e-09
NR2F1-AS1	1.5624	3.20316e-11	1.38991e-09
GBA1	-0.67632	3.20663e-11	1.38991e-09
RS1	-0.394293	3.21301e-11	1.39068e-09
ENSG00000267383	0.942373	3.21813e-11	1.39089e-09
ZNF525	0.550211	3.22908e-11	1.39363e-09
PMM2P1	1.13146	3.24376e-11	1.39673e-09
ENSG00000249763	0.811377	3.24628e-11	1.39673e-09
ENSG00000278126	1.70027	3.25754e-11	1.39673e-09
UGT2B26P	0.90369	3.25821e-11	1.39673e-09
IFT122	-0.373491	3.2594e-11	1.39673e-09
UHRF2P1	0.687588	3.2814e-11	1.40416e-09
KLRD1	0.612405	3.28941e-11	1.40559e-09
NPM1P33	1.06718	3.30129e-11	1.40782e-09
PIGUP1	0.938923	3.30841e-11	1.40782e-09
RPL7P54	1.23813	3.30862e-11	1.40782e-09
ENSG00000248837	1.55373	3.32755e-11	1.41388e-09
PMCHL2	1.7002	3.36355e-11	1.4267e-09
CTAGE16P	0.584782	3.37906e-11	1.4267e-09
ENSG00000249562	1.51628	3.38192e-11	1.4267e-09
CMC2	0.6783	3.38235e-11	1.4267e-09
ENSG00000270469	1.45472	3.39114e-11	1.4267e-09
SCNN1G	-0.589285	3.39269e-11	1.4267e-09
RPS3AP22	1.48483	3.39272e-11	1.4267e-09
NXF3	-0.408219	3.39555e-11	1.4267e-09
LINC00882	1.42367	3.41283e-11	1.43167e-09
SETP2	1.35745	3.41688e-11	1.43167e-09
ZFYVE26	-0.382186	3.43312e-11	1.43648e-09
HUWE1	-0.292557	3.44205e-11	1.43823e-09
ENSG00000231466	1.08104	3.45552e-11	1.44186e-09
KPNA2P1	0.721913	3.48301e-11	1.45132e-09
RDXP1	0.96017	3.4967e-11	1.45306e-09
ENSG00000236713	1.71825	3.50387e-11	1.45306e-09
HMGB1P11	1.11845	3.50426e-11	1.45306e-09
ENSG00000234841	0.768374	3.50645e-11	1.45306e-09
RPL17P38	1.21854	3.51715e-11	1.45445e-09
ENSG00000248926	1.24846	3.51945e-11	1.45445e-09
ENSG00000250725	1.51947	3.52868e-11	1.45627e-09
SLC9B1P3	0.878951	3.53931e-11	1.45866e-09
MOB4P1	1.10062	3.56099e-11	1.46559e-09
RPS7P12	1.66605	3.57232e-11	1.46825e-09
TERF1P7	0.821615	3.58545e-11	1.47164e-09
EEF1A1P26	1.4095	3.59583e-11	1.47243e-09
GLRX3P2	0.697972	3.59712e-11	1.47243e-09
HSPD1P5	0.766002	3.60335e-11	1.47298e-09
ENSG00000233264	1.21538	3.62088e-11	1.47332e-09
NPM1P11	1.53096	3.62176e-11	1.47332e-09
KCTD9P4	0.614711	3.62252e-11	1.47332e-09
ABI2	0.388227	3.62371e-11	1.47332e-09
RAC1P3	1.56738	3.64024e-11	1.47804e-09
RPL7L1P12	1.19383	3.65522e-11	1.48072e-09
ZNF138	0.620402	3.65665e-11	1.48072e-09
RAD1P1	1.04051	3.69109e-11	1.49267e-09
ENSG00000257308	1.26176	3.70778e-11	1.49741e-09
ENSG00000238081	1.22744	3.71606e-11	1.49874e-09
ENSG00000279738	1.40601	3.72227e-11	1.49924e-09
UBE2W	0.739189	3.73677e-11	1.50151e-09
THUMPD3-AS1	1.59677	3.73785e-11	1.50151e-09
ARL14EPP1	1.3793	3.75633e-11	1.50609e-09
ENSG00000274299	1.16595	3.75923e-11	1.50609e-09
MTMR14	-0.551198	3.76568e-11	1.50667e-09
JPX	1.44859	3.77396e-11	1.50798e-09
GCKR	-0.542522	3.80925e-11	1.52007e-09
ENSG00000259350	1.73088	3.84544e-11	1.53047e-09
DDX10P2	0.785749	3.84546e-11	1.53047e-09
RPL7P13	0.961452	3.86628e-11	1.53673e-09
ENSG00000215409	1.24702	3.88003e-11	1.54017e-09
ASH2LP3	1.47699	3.89678e-11	1.54478e-09
TPTE2P1	1.28277	3.90886e-11	1.54562e-09
LINC01239	1.41521	3.90914e-11	1.54562e-09
RPS3AP12	1.03708	3.92074e-11	1.54682e-09
ZNF969P	0.967834	3.92242e-11	1.54682e-09
PPATP1	0.590314	3.9398e-11	1.55164e-09
TREM2	-0.788105	3.96864e-11	1.56097e-09
IMMP1LP1	0.966911	4.02926e-11	1.58274e-09
OR5H8	1.06345	4.03673e-11	1.58362e-09
RPS27AP11	0.883604	4.05393e-11	1.5883e-09
ENSG00000266907	0.685835	4.08065e-11	1.59493e-09
LINC01087	2.12568	4.08142e-11	1.59493e-09
PTPN11P5	0.572265	4.09015e-11	1.59627e-09
HSP90B2P	0.805684	4.1047e-11	1.59839e-09
SCNN1A	-0.520756	4.10619e-11	1.59839e-09
ENSG00000268892	1.03785	4.12729e-11	1.60454e-09
GARS1-DT	1.40024	4.20466e-11	1.63135e-09
ENSG00000267787	0.846921	4.20708e-11	1.63135e-09
ENSG00000260033	1.3322	4.21281e-11	1.63148e-09
GABBR2	-0.419362	4.22425e-11	1.63381e-09
ENSG00000203262	1.31939	4.23649e-11	1.63469e-09
RAB6C-AS1	1.15223	4.23737e-11	1.63469e-09
RPL21P123	1.03194	4.25724e-11	1.64026e-09
ENSG00000277695	1.84572	4.29864e-11	1.65251e-09
RRAS2P2	1.42473	4.3e-11	1.65251e-09
PAICSP1	1.433	4.31711e-11	1.6546e-09
ANKRD62P1	1.00827	4.3172e-11	1.6546e-09
TCP1P1	0.765076	4.32482e-11	1.6546e-09
THAP12P3	0.939167	4.32736e-11	1.6546e-09
ENSG00000255413	1.24398	4.35004e-11	1.66044e-09
LINC01208	1.27171	4.35364e-11	1.66044e-09
ZNF66	0.584917	4.37112e-11	1.665e-09
RPL21P58	0.988528	4.38303e-11	1.66726e-09
HSP90AA6P	0.953067	4.3881e-11	1.66726e-09
SNORD38D	1.64977	4.4037e-11	1.67076e-09
PDCD5P2	1.03893	4.4084e-11	1.67076e-09
SAR1AP4	1.01316	4.43344e-11	1.67814e-09
ENSG00000214890	1.08434	4.46399e-11	1.68621e-09
GARS1P1	1.4165	4.46592e-11	1.68621e-09
COX20P2	1.58263	4.4886e-11	1.69265e-09
ENSG00000280117	1.60636	4.55317e-11	1.71486e-09
MRPS5	0.783009	4.56039e-11	1.71543e-09
RPL7L1P15	1.05321	4.57263e-11	1.7179e-09
HNRNPA1P17	1.26762	4.59845e-11	1.72501e-09
DCTN1	-0.612615	4.60301e-11	1.72501e-09
ENSG00000250376	1.1722	4.62199e-11	1.72819e-09
ENSG00000259924	0.783109	4.62293e-11	1.72819e-09
ENSG00000230615	1.459	4.63659e-11	1.73114e-09
THAP5P2	1.84553	4.64619e-11	1.73259e-09
ENSG00000251354	0.946921	4.66398e-11	1.73707e-09
FGFR2	-0.261211	4.70165e-11	1.74895e-09
GPATCH11P1	1.01391	4.70975e-11	1.7498e-09
LINC02080	1.51479	4.72744e-11	1.75387e-09
ANKRD20A11P	0.919024	4.73233e-11	1.75387e-09
TAS2R46	0.634681	4.75561e-11	1.75843e-09
RPS3AP41	1.16038	4.7613e-11	1.75843e-09
ETF1P3	1.05283	4.76211e-11	1.75843e-09
ENSG00000229305	1.79796	4.77387e-11	1.75886e-09
SNX5P2	0.895094	4.77494e-11	1.75886e-09
NPM1P38	1.02076	4.80019e-11	1.766e-09
ENSG00000290821	1.53412	4.81517e-11	1.76936e-09
HELLPAR	1.42718	4.8603e-11	1.78377e-09
HNRNPKP5	1.54428	4.9247e-11	1.8052e-09
RPL5P22	0.948909	4.93645e-11	1.80562e-09
PTPN11P4	0.632051	4.93779e-11	1.80562e-09
MSANTD2P1	1.11426	4.95027e-11	1.80799e-09
OFD1P17	0.774027	4.98303e-11	1.81745e-09
EIF2S2P1	1.06897	4.98822e-11	1.81745e-09
ENSG00000230623	1.60885	5.0065e-11	1.81908e-09
RPL5P5	1.03029	5.00728e-11	1.81908e-09
ENSG00000274281	2.06677	5.01682e-11	1.81908e-09
C9orf85P2	1.19596	5.01847e-11	1.81908e-09
RPS15AP13	1.60999	5.02655e-11	1.81908e-09
LRSAM1	-0.510171	5.02888e-11	1.81908e-09
ENSG00000239920	1.3401	5.05314e-11	1.82567e-09
RPL35AP33	1.3708	5.07877e-11	1.83273e-09
GMFBP1	1.05138	5.08757e-11	1.83356e-09
NPM1P48	0.978123	5.09898e-11	1.83356e-09
HNRNPA1P11	0.889652	5.09931e-11	1.83356e-09
UQCRC2P1	1.36812	5.10684e-11	1.83408e-09
ENSG00000212266	2.10558	5.13356e-11	1.84149e-09
RPL7P50	1.19766	5.15413e-11	1.84667e-09
ENSG00000214641	1.36944	5.16614e-11	1.84878e-09
LINC02937	1.50908	5.29465e-11	1.89252e-09
ENSG00000279662	1.76716	5.3058e-11	1.89426e-09
RPS4XP8	0.889254	5.32381e-11	1.89803e-09
RPS3AP32	1.48526	5.32892e-11	1.89803e-09
ENSG00000286641	1.77771	5.33792e-11	1.89899e-09
ENSG00000287516	1.37832	5.34714e-11	1.90003e-09
RLIG1P3	1.25796	5.35659e-11	1.90115e-09
METTL5P1	1.26314	5.36687e-11	1.90256e-09
NPM1P21	0.718238	5.39246e-11	1.90939e-09
RPS15AP24	0.959118	5.407e-11	1.91095e-09
ENSG00000267620	0.889898	5.40956e-11	1.91095e-09
NPM1P3	1.28801	5.45298e-11	1.92361e-09
IDH3B	-0.645484	5.45813e-11	1.92361e-09
CCNJP2	1.01906	5.49417e-11	1.93405e-09
CCNT2P1	1.37483	5.52547e-11	1.9428e-09
HK2	-0.570505	5.59563e-11	1.96518e-09
EOMES	-0.398373	5.60393e-11	1.96581e-09
TERF1P6	1.49815	5.61742e-11	1.96825e-09
TERF1P5	0.830751	5.6296e-11	1.97023e-09
NECAB2	-0.734128	5.66188e-11	1.97923e-09
NR2C2AP	-0.79558	5.6978e-11	1.98764e-09
NPM1P8	1.07806	5.69912e-11	1.98764e-09
RPL35AP37	1.4183	5.71508e-11	1.98994e-09
YIPF4	0.735661	5.7189e-11	1.98994e-09
ENSG00000251017	1.27947	5.73158e-11	1.99145e-09
SSBL2P	0.979942	5.73645e-11	1.99145e-09
ASAH1-AS1	1.38109	5.75613e-11	1.99473e-09
ENSG00000248586	0.758552	5.76465e-11	1.99473e-09
ENSG00000233539	0.79226	5.76572e-11	1.99473e-09
CDK8P2	1.32637	5.77377e-11	1.99523e-09
ENSG00000291075	1.24689	5.82153e-11	2.00943e-09
ZNF812P	1.51199	5.90935e-11	2.03526e-09
ENSG00000256674	0.967174	5.90988e-11	2.03526e-09
C2orf15	1.08749	5.92583e-11	2.03756e-09
ANKRD20A5P	1.06718	5.93344e-11	2.03756e-09
LINC01607	1.89693	5.94281e-11	2.03756e-09
CEP43	0.731638	5.94355e-11	2.03756e-09
HNRNPA1P24	1.27025	5.9599e-11	2.04057e-09
ENSG00000276517	1.47438	5.96588e-11	2.04057e-09
ENSG00000279217	1.38766	6.00053e-11	2.04845e-09
PARLP1	0.929067	6.00853e-11	2.04845e-09
CFHR2	0.710811	6.01575e-11	2.04845e-09
ENSG00000232342	1.90885	6.01607e-11	2.04845e-09
ENSG00000254503	1.19455	6.04415e-11	2.05569e-09
DYNC1H1	-0.26081	6.08663e-11	2.06781e-09
DSTNP2	1.17745	6.11341e-11	2.07457e-09
RPS27AP2	0.886198	6.12239e-11	2.07528e-09
ENSG00000277174	1.92828	6.16146e-11	2.08618e-09
CCNB1IP1P1	1.29257	6.17723e-11	2.08918e-09
THAP12P1	0.855393	6.23624e-11	2.10652e-09
ENSG00000248200	1.99506	6.24248e-11	2.10652e-09
ENSG00000250847	1.63862	6.25928e-11	2.10983e-09
CIBAR1P2	1.13057	6.26707e-11	2.1101e-09
RPL34P26	0.988468	6.30208e-11	2.11952e-09
COL6A3	-0.287948	6.34095e-11	2.13022e-09
GPR160	0.999898	6.34832e-11	2.13032e-09
GXYLT1P6	1.48864	6.36581e-11	2.13382e-09
CASC19	1.34608	6.42358e-11	2.15053e-09
ENSG00000253803	1.12161	6.42993e-11	2.15053e-09
SLC12A3	-0.724347	6.4789e-11	2.16451e-09
MT-ND3	4.04309	6.49215e-11	2.16517e-09
ATP7B	-0.370381	6.49557e-11	2.16517e-09
ENSG00000255581	0.898844	6.50241e-11	2.16517e-09
TXNP1	1.29095	6.52777e-11	2.17122e-09
FN1	-0.248073	6.55037e-11	2.17578e-09
ENSG00000226552	1.17698	6.55914e-11	2.17578e-09
RPL4P3	0.879965	6.5631e-11	2.17578e-09
OSER1-DT	1.65251	6.57286e-11	2.17662e-09
RSL24D1P6	1.29164	6.69321e-11	2.21404e-09
LINC02334	1.43096	6.72726e-11	2.22287e-09
CFAP69P1	1.28565	6.75294e-11	2.22891e-09
ENSG00000220522	1.57201	6.79094e-11	2.23901e-09
ENSG00000230303	1.41542	6.90861e-11	2.27532e-09
ELAC2	-0.399122	6.94442e-11	2.28262e-09
INTS6P1	0.596089	6.94591e-11	2.28262e-09
PA2G4P3	1.05951	6.96172e-11	2.28532e-09
PLCD1	-0.816394	6.98559e-11	2.29067e-09
NLRP2	-0.33149	7.01452e-11	2.29765e-09
TARDBPP2	0.688753	7.05319e-11	2.30781e-09
RSL24D1P3	1.34375	7.07254e-11	2.31014e-09
ENSG00000255342	1.2386	7.07561e-11	2.31014e-09
ENSG00000228984	1.08094	7.08947e-11	2.31149e-09
BCAS2P2	0.941187	7.09506e-11	2.31149e-09
C3	-0.592251	7.17373e-11	2.33413e-09
INSR	-0.444217	7.18003e-11	2.33413e-09
RPL7P48	1.00908	7.20468e-11	2.33962e-09
RPS24P8	1.09491	7.22615e-11	2.34234e-09
ENSG00000225505	1.78423	7.22859e-11	2.34234e-09
GRIN2B	-0.380853	7.24816e-11	2.34571e-09
ANKRD26P3	1.49315	7.25454e-11	2.34571e-09
HNRNPA1P58	0.938076	7.28891e-11	2.3543e-09
NOL8P1	0.918575	7.30063e-11	2.35557e-09
RCN2	0.663201	7.32388e-11	2.35988e-09
RPL5P8	1.31761	7.32965e-11	2.35988e-09
MTRF1LP1	0.870234	7.3675e-11	2.36954e-09
VPS35P1	0.572474	7.41807e-11	2.38326e-09
ENSG00000258446	1.85835	7.43703e-11	2.38681e-09
RPS4XP14	0.876759	7.44591e-11	2.38712e-09
NUFIP1P1	0.688871	7.45942e-11	2.38805e-09
YWHAZP8	1.59122	7.46465e-11	2.38805e-09
RIPK2-DT	1.51101	7.48042e-11	2.39057e-09
ENSG00000248493	0.781485	7.53357e-11	2.40421e-09
RPS3AP27	1.42473	7.53905e-11	2.40421e-09
RSL24D1P1	1.12972	7.5566e-11	2.40726e-09
COPS5P1	1.26582	7.64747e-11	2.43364e-09
RBM22P12	1.24978	7.70719e-11	2.45006e-09
MMP2	-0.650894	7.72218e-11	2.45224e-09
ENSG00000269842	1.03843	7.76724e-11	2.46395e-09
LINC01515	1.60066	7.79678e-11	2.47073e-09
ENSG00000291066	1.09747	7.83634e-11	2.47908e-09
POMGNT1	-0.664749	7.83957e-11	2.47908e-09
PRICKLE1P1	1.174	7.91789e-11	2.50123e-09
ITPRID2-DT	2.24929	7.9403e-11	2.50369e-09
PTP4A2P2	0.950456	7.95039e-11	2.50369e-09
RPL7P37	0.956229	7.95058e-11	2.50369e-09
RPS15AP12	1.05807	7.97179e-11	2.50775e-09
ENSG00000225451	0.988808	7.99065e-11	2.51106e-09
BASP1-AS1	1.36934	8.01523e-11	2.5112e-09
LARGE1	-0.42274	8.02131e-11	2.5112e-09
ENSG00000286195	1.75862	8.02281e-11	2.5112e-09
LINC02980	1.27941	8.02483e-11	2.5112e-09
MT-ND4	4.23675	8.03272e-11	2.5112e-09
ENSG00000280171	0.977858	8.06654e-11	2.51917e-09
ATG4AP1	0.806485	8.14654e-11	2.54152e-09
ANKRD20A21P	0.930215	8.16092e-11	2.54338e-09
LINC01422	1.43664	8.19539e-11	2.54995e-09
RPL5P29	1.05488	8.20275e-11	2.54995e-09
ENSG00000277498	1.53435	8.20766e-11	2.54995e-09
ASXL1	-0.320095	8.21656e-11	2.54995e-09
DDX43P1	1.37172	8.22428e-11	2.54995e-09
ZNF765	0.515526	8.26252e-11	2.55917e-09
RHCE	-0.514158	8.2747e-11	2.56032e-09
SRRM1P3	0.654507	8.30417e-11	2.5668e-09
RPL6P4	1.12938	8.33403e-11	2.5734e-09
ENSG00000233724	1.37507	8.38586e-11	2.58676e-09
ELF4	-0.581863	8.44368e-11	2.60193e-09
ENSG00000261774	1.31572	8.5045e-11	2.61631e-09
KDM5C	-0.621274	8.52232e-11	2.61631e-09
ENSG00000290928	1.36196	8.52308e-11	2.61631e-09
NDUFB4P1	1.34523	8.52503e-11	2.61631e-09
MFN1P1	0.78275	8.58254e-11	2.63105e-09
ENSG00000286355	1.5833	8.59332e-11	2.63105e-09
ANKRD18FP	1.88722	8.59922e-11	2.63105e-09
PRNP	-0.597311	8.62106e-11	2.63506e-09
SREBF2	-0.563146	8.64544e-11	2.63983e-09
ENSG00000262384	2.00625	8.66188e-11	2.64218e-09
RFKP2	1.33521	8.69657e-11	2.64906e-09
ENSG00000268379	0.896327	8.70213e-11	2.64906e-09
PSMB7P1	1.22378	8.71077e-11	2.64906e-09
EGFR	-0.334942	8.72642e-11	2.65114e-09
UGT1A12P	0.757421	8.76066e-11	2.65887e-09
USH1C	-0.629414	8.79274e-11	2.66592e-09
EIF2S2P5	1.50136	8.83108e-11	2.67291e-09
XPOTP1	0.651389	8.83351e-11	2.67291e-09
IGF1R	-0.414691	8.91939e-11	2.69593e-09
ENSG00000284722	1.25212	8.92746e-11	2.69593e-09
ENSG00000224297	1.32782	8.95277e-11	2.70087e-09
EXOSC6	1.11413	8.96374e-11	2.70148e-09
PIGAP1	0.912749	9.05357e-11	2.72583e-09
U2SURPP1	1.00803	9.06379e-11	2.72618e-09
CUBNP2	0.584334	9.08148e-11	2.72879e-09
RPL21P70	1.21817	9.10469e-11	2.73064e-09
CHORDC2P	0.756445	9.10576e-11	2.73064e-09
GON4L	-0.198806	9.1459e-11	2.73996e-09
PPP4R2P4	0.947127	9.16061e-11	2.74164e-09
ENSG00000285796	1.36294	9.2039e-11	2.75186e-09
PNPLA10P	1.71685	9.24314e-11	2.76086e-09
ENSG00000231353	1.5159	9.25719e-11	2.76232e-09
B3GALNT1P1	1.16573	9.29607e-11	2.77069e-09
NDUFA5P11	1.19867	9.30361e-11	2.77069e-09
SUCLA2P3	0.77138	9.34646e-11	2.77552e-09
SSBL6P	1.19148	9.35288e-11	2.77552e-09
ZFP91P1	1.09838	9.36041e-11	2.77552e-09
ENSG00000254771	0.896311	9.36997e-11	2.77552e-09
MRPL35P1	0.788205	9.37061e-11	2.77552e-09
DHFRP6	1.17654	9.37502e-11	2.77552e-09
RPL17P17	1.20043	9.40224e-11	2.78085e-09
QRSL1P1	0.971124	9.50045e-11	2.80714e-09
ZNF117	0.635055	9.55685e-11	2.82105e-09
SAMMSON	1.48442	9.56891e-11	2.82185e-09
WEE2P1	1.20008	9.76284e-11	2.87622e-09
ENSG00000282924	0.827972	9.86959e-11	2.90484e-09
RPS20P24	0.869901	9.88703e-11	2.90713e-09
ENSG00000279917	1.59067	9.91157e-11	2.90774e-09
SNAP25-AS1	1.49094	9.91348e-11	2.90774e-09
CYCSP6	0.903844	9.91801e-11	2.90774e-09
ENSG00000285517	1.53896	9.98896e-11	2.9257e-09
ENSG00000292979	1.40321	1.00224e-10	2.93265e-09
LINC02475	1.59859	1.00431e-10	2.93422e-09
ENSG00000261628	1.46231	1.00472e-10	2.93422e-09
ENSG00000214770	1.62029	1.00774e-10	2.94019e-09
ENSG00000270509	1.55107	1.01089e-10	2.94651e-09
MEG8	0.712193	1.01534e-10	2.95665e-09
HMGB1P29	1.77763	1.02381e-10	2.97371e-09
SETP11	1.4728	1.02386e-10	2.97371e-09
ENSG00000286677	1.90989	1.02454e-10	2.97371e-09
MYH7	-0.679218	1.02515e-10	2.97371e-09
FLG	-0.465144	1.03007e-10	2.98513e-09
ENSG00000254786	1.16407	1.03202e-10	2.98531e-09
ENSG00000215237	0.976349	1.03211e-10	2.98531e-09
ZBED3-AS1	1.33252	1.03983e-10	3.00476e-09
RPL21P104	1.09657	1.04091e-10	3.005e-09
ENSG00000254373	1.04273	1.04325e-10	3.00874e-09
ENSG00000236456	0.876577	1.04438e-10	3.00874e-09
PSMC1P7	1.03977	1.04571e-10	3.00874e-09
RPS4XP22	1.02686	1.0462e-10	3.00874e-09
ENSG00000291207	0.718612	1.04777e-10	3.00976e-09
OR4C50P	0.798828	1.04855e-10	3.00976e-09
RPL7P58	1.03812	1.05021e-10	3.01167e-09
ENSG00000251342	1.13638	1.05393e-10	3.01879e-09
RPL31P18	1.22061	1.0547e-10	3.01879e-09
ENSG00000256075	0.838631	1.05946e-10	3.02596e-09
TMPRSS3	-0.457397	1.05967e-10	3.02596e-09
ENSG00000214067	1.27913	1.06021e-10	3.02596e-09
ZNF887P	1.08189	1.0652e-10	3.0363e-09
ENSG00000277290	1.24662	1.06673e-10	3.0363e-09
SLC28A1	-0.763409	1.06685e-10	3.0363e-09
ENSG00000271044	1.77338	1.06801e-10	3.03672e-09
FGF7P2	0.985189	1.07193e-10	3.04502e-09
YWHAZP7	1.43932	1.0779e-10	3.0591e-09
ANK1	-0.634371	1.08058e-10	3.0638e-09
ZBTB8B	1.44198	1.0824e-10	3.06511e-09
CETP	-0.684963	1.08369e-10	3.06511e-09
ENSG00000253107	1.423	1.08409e-10	3.06511e-09
DDC	-0.380352	1.08775e-10	3.07258e-09
ENSG00000240296	1.39375	1.08997e-10	3.07529e-09
DYSF	-0.622689	1.09074e-10	3.07529e-09
EPB41L1	-0.593072	1.09338e-10	3.07983e-09
FAT2	-0.420802	1.09674e-10	3.08642e-09
KATNBL1P4	1.3923	1.09925e-10	3.09013e-09
ENSG00000288597	1.14182	1.10011e-10	3.09013e-09
RPS27L	0.65141	1.10162e-10	3.09151e-09
ENSG00000270682	1.31114	1.10388e-10	3.09495e-09
RBM39P1	0.707946	1.10674e-10	3.10011e-09
CHRND	-0.73044	1.10895e-10	3.1023e-09
NRP2	-0.438417	1.10958e-10	3.1023e-09
EFCAB14P1	0.904316	1.11704e-10	3.12025e-09
MITA1	1.63613	1.12017e-10	3.12611e-09
RPL21P90	0.995741	1.12122e-10	3.12615e-09
TRAF6P1	0.622684	1.12848e-10	3.14349e-09
TTC3P1	0.56568	1.13071e-10	3.14679e-09
PWWP2AP1	1.50614	1.13388e-10	3.15272e-09
CWC27	0.613487	1.14316e-10	3.17558e-09
XNDC1N	0.761167	1.14453e-10	3.17647e-09
KRT6B	-0.716636	1.15103e-10	3.19157e-09
ENSG00000286269	1.66665	1.15361e-10	3.19578e-09
AP1S3	0.559733	1.15926e-10	3.20848e-09
HSD11B1	-0.321953	1.16667e-10	3.22605e-09
RPL7P27	1.123	1.17035e-10	3.23324e-09
CNKSR1	-0.775138	1.17552e-10	3.24457e-09
PPBPP2	1.8673	1.17661e-10	3.2446e-09
MYH6	-0.66809	1.18134e-10	3.25466e-09
HNRNPA3P8	0.884161	1.18871e-10	3.27198e-09
SLC25A15P5	0.770015	1.1914e-10	3.27641e-09
CACNA1F	-0.659571	1.2037e-10	3.3072e-09
ENSG00000287126	1.11529	1.20873e-10	3.31785e-09
CDH3	-0.603574	1.20977e-10	3.31785e-09
RBISP5	1.42028	1.21094e-10	3.31805e-09
RPS13P3	1.22447	1.21676e-10	3.33098e-09
EPHB2	-0.598919	1.21975e-10	3.33612e-09
CCPG1	0.772204	1.22208e-10	3.33796e-09
CEP57L1P1	0.661293	1.22263e-10	3.33796e-09
SNHG5	0.811529	1.22479e-10	3.34082e-09
ENSG00000231881	1.30239	1.23703e-10	3.3702e-09
EIF4G1	-0.491193	1.23779e-10	3.3702e-09
COQ9	-0.572861	1.24384e-10	3.38361e-09
ENSG00000257277	1.91242	1.2454e-10	3.38479e-09
RPL21P31	1.21826	1.24666e-10	3.38516e-09
MYO1A	-0.598322	1.25047e-10	3.39247e-09
FKBP14	0.573628	1.25322e-10	3.39687e-09
GTF3C6P2	0.885537	1.25659e-10	3.40294e-09
ZNF652P1	1.06348	1.2601e-10	3.40939e-09
LAMTOR3P1	0.962814	1.26282e-10	3.4137e-09
MRLN	1.24626	1.2678e-10	3.42409e-09
NOP56P2	1.36948	1.27005e-10	3.4248e-09
ENSG00000273507	1.62223	1.2709e-10	3.4248e-09
SEC14L1P1	0.848166	1.27147e-10	3.4248e-09
ENSG00000287933	2.03642	1.27351e-10	3.42722e-09
NF1P3	0.783915	1.27553e-10	3.42962e-09
BUB3P1	0.777452	1.27898e-10	3.43176e-09
HULC	1.46662	1.27958e-10	3.43176e-09
RNF14P2	1.84752	1.27974e-10	3.43176e-09
RPL12P29	1.15421	1.28289e-10	3.43715e-09
ENSG00000287862	1.62123	1.2841e-10	3.43734e-09
TEK	-0.238581	1.28639e-10	3.44041e-09
FYCO1	-0.565108	1.29089e-10	3.44939e-09
RPL39P29	1.2937	1.29788e-10	3.46283e-09
ATP12A	-0.393151	1.29822e-10	3.46283e-09
RPL5P9	0.920088	1.30089e-10	3.46688e-09
PPP2R5CP	0.804965	1.30386e-10	3.46985e-09
ENSG00000253793	0.948972	1.3043e-10	3.46985e-09
FBLN1	-0.599562	1.30889e-10	3.479e-09
KCNQ3	-0.402525	1.3173e-10	3.49826e-09
CASP1P2	0.999048	1.32428e-10	3.5102e-09
ITK	-0.279547	1.32436e-10	3.5102e-09
RPL5P35	0.866944	1.32528e-10	3.5102e-09
WDFY4	-0.43618	1.32802e-10	3.51437e-09
MAN1A2P1	1.1722	1.33035e-10	3.51744e-09
OR4A50P	1.19228	1.33957e-10	3.53582e-09
NAP1L1P1	1.01514	1.33964e-10	3.53582e-09
RPS3AP42	1.59798	1.35556e-10	3.57469e-09
STPG2-AS1	2.01216	1.36004e-10	3.58114e-09
AGGF1P5	1.2638	1.36092e-10	3.58114e-09
RPL5P23	0.785098	1.36157e-10	3.58114e-09
PRELID3BP3	1.24096	1.36727e-10	3.5916e-09
ENSG00000234147	1.74716	1.36925e-10	3.5916e-09
ENSG00000253480	1.20278	1.3698e-10	3.5916e-09
CENPNP2	1.55721	1.37064e-10	3.5916e-09
ENSG00000257511	0.733895	1.3715e-10	3.5916e-09
ENSG00000253372	1.71631	1.38225e-10	3.6147e-09
ENSG00000236674	1.12942	1.38271e-10	3.6147e-09
CALM2P1	1.24618	1.39143e-10	3.62783e-09
COLQ	-0.419198	1.39224e-10	3.62783e-09
ENSG00000216613	1.32257	1.39243e-10	3.62783e-09
HSPD1P11	1.02883	1.39255e-10	3.62783e-09
UBE2Q2P10	1.115	1.39492e-10	3.62861e-09
AMD1P1	1.32273	1.39525e-10	3.62861e-09
ENSG00000291203	0.961459	1.40404e-10	3.64575e-09
ENSG00000287846	1.51569	1.40426e-10	3.64575e-09
LETR1	1.62531	1.40658e-10	3.6486e-09
GDI2P1	1.11685	1.4079e-10	3.6486e-09
TPMTP4	1.49513	1.40898e-10	3.6486e-09
EPAS1	-0.621224	1.44108e-10	3.72479e-09
ENSG00000257350	0.641149	1.44328e-10	3.72479e-09
ELOVL1	-0.55932	1.44438e-10	3.72479e-09
RPL23AP80	1.09432	1.44527e-10	3.72479e-09
RPL21P21	0.993519	1.4458e-10	3.72479e-09
ATE1	0.388761	1.44581e-10	3.72479e-09
GTF2IP5	1.0936	1.44979e-10	3.73185e-09
PDCL3P7	1.01379	1.45358e-10	3.73788e-09
TMEM273	-0.488475	1.45461e-10	3.73788e-09
GAD1	-0.216833	1.46026e-10	3.74921e-09
PPM1AP1	1.00107	1.47345e-10	3.77781e-09
NLRP9P1	1.08607	1.47391e-10	3.77781e-09
PP1P	0.743808	1.47548e-10	3.77862e-09
ENSG00000255463	1.29194	1.47697e-10	3.77923e-09
TRMT10BP1	1.20667	1.49021e-10	3.80988e-09
ENSG00000261324	1.53253	1.49181e-10	3.81026e-09
RPS6KA5	0.396018	1.49288e-10	3.81026e-09
LINC01445	1.16278	1.4964e-10	3.81336e-09
TBX15	-0.34067	1.49662e-10	3.81336e-09
NFU1P1	0.842106	1.51434e-10	3.85224e-09
ZBTB40	-0.316759	1.51444e-10	3.85224e-09
CCT8P1	0.628014	1.53289e-10	3.89589e-09
GPALPP1	0.529139	1.54833e-10	3.93181e-09
MOCS1	-0.595572	1.55322e-10	3.93975e-09
CEACAM16-AS1	1.0764	1.55465e-10	3.93975e-09
SETP21	0.79175	1.55537e-10	3.93975e-09
HNRNPA1P64	0.909928	1.56122e-10	3.95124e-09
RPS3AP51	1.40889	1.56739e-10	3.96353e-09
HNRNPA3P14	0.840502	1.56967e-10	3.96577e-09
NAA50P1	1.13117	1.5716e-10	3.96577e-09
CALM2P2	0.937505	1.57222e-10	3.96577e-09
ALOX12-AS1	0.537271	1.58774e-10	4.00158e-09
RPL9P14	0.861622	1.5907e-10	4.00569e-09
FNTA	0.700309	1.59272e-10	4.00744e-09
DYNLT3P1	1.07711	1.60916e-10	4.04303e-09
ENSG00000284523	1.40622	1.60955e-10	4.04303e-09
ENSG00000183171	0.7453	1.61228e-10	4.04654e-09
LINC01484	1.42912	1.61916e-10	4.06041e-09
TERF1P2	0.900779	1.624e-10	4.06918e-09
RPS3AP30	1.10873	1.6297e-10	4.08006e-09
GLDC	-0.24138	1.63398e-10	4.08739e-09
ENSG00000287611	1.27179	1.6388e-10	4.09605e-09
NPM1P2	1.1211	1.64737e-10	4.11406e-09
ENSG00000257941	1.10614	1.65233e-10	4.12304e-09
LINC00621	1.2446	1.65374e-10	4.12314e-09
MIR548F2	1.20054	1.65552e-10	4.12417e-09
ENSG00000254712	1.08776	1.66092e-10	4.13421e-09
C8A	-0.27317	1.66297e-10	4.13591e-09
USP12P1	0.907148	1.66974e-10	4.14932e-09
ENSG00000291130	1.07256	1.68451e-10	4.18257e-09
LINC01358	1.50585	1.68736e-10	4.1862e-09
PEX6	-0.642483	1.69114e-10	4.1876e-09
RPL21P106	1.25864	1.6922e-10	4.1876e-09
BMPER	-0.3021	1.69253e-10	4.1876e-09
ERICH2-DT	1.52888	1.69348e-10	4.1876e-09
SDCBPP1	1.14019	1.6969e-10	4.19263e-09
TEX15	0.561184	1.69859e-10	4.19337e-09
SIPA1L1	-0.257591	1.70357e-10	4.19911e-09
VWF	-0.602393	1.7037e-10	4.19911e-09
FAM204DP	1.26947	1.70656e-10	4.20273e-09
RBPJ	0.431389	1.72279e-10	4.23925e-09
HNRNPKP1	0.823897	1.72559e-10	4.24266e-09
ZBTB8OSP2	0.767028	1.72812e-10	4.24544e-09
RPS3AP37	1.09742	1.74915e-10	4.2936e-09
ABCC6	-0.701853	1.758e-10	4.31182e-09
NUSAP1	1.20866	1.76055e-10	4.31456e-09
SEPTIN7P12	1.37488	1.76759e-10	4.32831e-09
ENSG00000280432	1.2838	1.77951e-10	4.35395e-09
ENSG00000230328	1.85884	1.78624e-10	4.36688e-09
TARDBPP4	0.962864	1.79314e-10	4.38021e-09
CATSPER4	-0.587535	1.80523e-10	4.40045e-09
ENSG00000234907	1.41076	1.80675e-10	4.40045e-09
PEX16	-0.757834	1.80737e-10	4.40045e-09
XIAPP3	1.02463	1.80814e-10	4.40045e-09
THAP12P6	1.49715	1.80872e-10	4.40045e-09
QRSL1P2	0.940753	1.82195e-10	4.42658e-09
COX10-DT	1.48615	1.82478e-10	4.42658e-09
ENSG00000253550	1.38312	1.82576e-10	4.42658e-09
ENSG00000249157	1.38297	1.82624e-10	4.42658e-09
C1GALT1P2	1.17585	1.8268e-10	4.42658e-09
ENSG00000256081	1.1698	1.83303e-10	4.43635e-09
ENSG00000277206	1.09393	1.83536e-10	4.43635e-09
ENSG00000228392	1.57376	1.83814e-10	4.43635e-09
ENSG00000229369	1.34586	1.83933e-10	4.43635e-09
SRPX2	-0.503144	1.83947e-10	4.43635e-09
THUMPD3P1	1.30221	1.83966e-10	4.43635e-09
RPL7P30	1.57784	1.85384e-10	4.4669e-09
ENSG00000285867	1.69841	1.85529e-10	4.4669e-09
ZNF962P	0.975804	1.86256e-10	4.48083e-09
ZNF568	0.508106	1.8657e-10	4.48483e-09
ACAN	-0.602511	1.87131e-10	4.49471e-09
NSA2P5	1.09004	1.88765e-10	4.53036e-09
ENSG00000266179	1.69116	1.89782e-10	4.55001e-09
RTRAFP1	1.19253	1.90006e-10	4.55001e-09
FAM230C	1.15042	1.90184e-10	4.55001e-09
RP9P	0.781479	1.90285e-10	4.55001e-09
ENSG00000274631	1.37806	1.90338e-10	4.55001e-09
TPT1P7	1.59153	1.90969e-10	4.56148e-09
ZNF44	0.423554	1.91234e-10	4.5642e-09
RAB11AP1	1.2501	1.91522e-10	4.56629e-09
ENSG00000257169	1.16259	1.91624e-10	4.56629e-09
SPOPLP2	1.19586	1.923e-10	4.57878e-09
RPL21P64	1.34383	1.93285e-10	4.5986e-09
SRP72P2	0.790284	1.93933e-10	4.61037e-09
ENSG00000253180	1.04757	1.94624e-10	4.62317e-09
RFPL4AP3	1.06959	1.95735e-10	4.6459e-09
RPS3AP39	1.14085	1.96051e-10	4.64974e-09
CBX3P5	1.36775	1.98115e-10	4.695e-09
MERTK	-0.247539	2.0075e-10	4.75371e-09
RPS3AP36	0.893341	2.01065e-10	4.75515e-09
RPL5P12	0.974379	2.0126e-10	4.75515e-09
PROS2P	0.745583	2.01284e-10	4.75515e-09
HMGB1P16	1.24921	2.01765e-10	4.76279e-09
ZNF75CP	0.865461	2.02796e-10	4.78338e-09
SLC24A1	-0.424327	2.03393e-10	4.79371e-09
THAP12P8	1.08046	2.04253e-10	4.80785e-09
HMGN1P11	1.19747	2.04311e-10	4.80785e-09
MFSD5	-0.703026	2.04823e-10	4.81614e-09
MTHFD2P5	0.953674	2.05567e-10	4.82986e-09
ENSG00000240401	1.31349	2.05842e-10	4.83257e-09
UBE2Q2P1	0.813844	2.0711e-10	4.85471e-09
RNF213	-0.357728	2.07171e-10	4.85471e-09
PCMTD1P3	1.05936	2.07276e-10	4.85471e-09
SLC30A4-AS1	1.41995	2.07429e-10	4.85471e-09
USP11	-0.667253	2.08037e-10	4.86278e-09
ENSG00000220739	1.32717	2.08222e-10	4.86278e-09
ENSG00000254957	1.37792	2.08346e-10	4.86278e-09
SCUBE2	-0.400069	2.08419e-10	4.86278e-09
ATP1A2	-0.628466	2.0867e-10	4.86488e-09
PRAMEF20	-0.613374	2.09182e-10	4.87295e-09
ZNF592	-0.613139	2.09339e-10	4.87295e-09
ENSG00000259137	0.708876	2.10617e-10	4.89891e-09
ENSG00000233288	1.37849	2.11111e-10	4.90662e-09
AK6P2	1.30912	2.12558e-10	4.93644e-09
RPS25P3	1.20797	2.12827e-10	4.93733e-09
IPMKP1	0.943381	2.12923e-10	4.93733e-09
ENSG00000290911	1.18122	2.13405e-10	4.94469e-09
HSPA8P7	0.8279	2.13857e-10	4.95138e-09
ZNF415P1	1.62815	2.14291e-10	4.95762e-09
ENSG00000251288	0.73963	2.15553e-10	4.98299e-09
RPS3AP10	1.41489	2.15773e-10	4.98426e-09
TTC21A	-0.480901	2.16616e-10	4.9999e-09
HMGB1P45	1.24079	2.18372e-10	5.03659e-09
ZIK1P1	1.07291	2.18964e-10	5.04019e-09
ENSG00000226971	0.807924	2.18966e-10	5.04019e-09
OR6C72P	1.30199	2.19073e-10	5.04019e-09
RPL5P26	1.10362	2.19277e-10	5.04019e-09
STX18-AS1	1.2845	2.19482e-10	5.04019e-09
NIPA2P4	1.62391	2.19531e-10	5.04019e-09
CCT6P4	1.07114	2.20478e-10	5.05809e-09
ENSG00000259742	1.22837	2.20661e-10	5.05843e-09
KRT6A	-0.76432	2.2292e-10	5.10634e-09
STXBP1	-0.520308	2.23403e-10	5.11351e-09
RPL21P99	1.23864	2.24265e-10	5.12937e-09
ANAPC10P1	1.02826	2.24603e-10	5.1332e-09
DUBR	1.57203	2.25302e-10	5.14529e-09
NPM1P1	1.35993	2.26285e-10	5.16381e-09
ENSG00000228354	0.959747	2.26977e-10	5.1757e-09
MCUR1P1	1.06967	2.27238e-10	5.17773e-09
DNAJB6P8	1.69734	2.27949e-10	5.189e-09
PDC-AS1	1.5388	2.28077e-10	5.189e-09
ENSG00000253657	1.46562	2.28569e-10	5.19591e-09
SLC9B1P1	1.22138	2.28725e-10	5.19591e-09
DUXAP7	1.35513	2.29369e-10	5.20157e-09
ENSG00000270612	0.852161	2.2949e-10	5.20157e-09
ANKRD18CP	0.95985	2.29491e-10	5.20157e-09
RPL34P1	1.05146	2.30824e-10	5.22785e-09
JAM3	-0.43496	2.31142e-10	5.23112e-09
MASP1	-0.501283	2.34178e-10	5.29587e-09
ENSG00000253183	0.948404	2.35388e-10	5.31924e-09
ENSG00000280128	1.58051	2.36715e-10	5.34522e-09
HMGB1P37	0.733721	2.37198e-10	5.35212e-09
PMM2P2	1.01161	2.37522e-10	5.35543e-09
NIFKP2	1.17948	2.3783e-10	5.35758e-09
SMG1P7	0.51713	2.37972e-10	5.35758e-09
HSP90AA3P	0.785594	2.38198e-10	5.35867e-09
DLX6-AS1	1.56701	2.39164e-10	5.37639e-09
TERF1P3	0.863253	2.39894e-10	5.38876e-09
DDX50P1	0.73255	2.40148e-10	5.38935e-09
COL7A1	-0.78942	2.40387e-10	5.38935e-09
FAT1P1	1.18652	2.40456e-10	5.38935e-09
ENSG00000242327	1.01596	2.4107e-10	5.39911e-09
PCED1B-AS1	1.4063	2.42357e-10	5.42391e-09
MRPL15P1	1.21523	2.43264e-10	5.44016e-09
LINC01492	1.52925	2.43795e-10	5.448e-09
ENSG00000229695	0.996023	2.44147e-10	5.45039e-09
ENSG00000267462	2.00638	2.44263e-10	5.45039e-09
ENSG00000249541	0.745355	2.45607e-10	5.47632e-09
RPS15AP14	1.35539	2.46121e-10	5.48373e-09
CASC15	1.33249	2.4656e-10	5.48946e-09
ENSG00000187472	1.16641	2.47411e-10	5.50435e-09
SNORD81	2.02147	2.47806e-10	5.50907e-09
CNOT7P2	0.855168	2.49965e-10	5.55298e-09
EEF1E1P1	1.06213	2.50576e-10	5.56246e-09
CATSPER1	-0.712803	2.51415e-10	5.57697e-09
ERVK9-11	1.08886	2.51775e-10	5.58085e-09
RPL21P95	1.26644	2.5304e-10	5.59814e-09
NSL1	0.50407	2.53094e-10	5.59814e-09
ANKRD36BP2	0.756279	2.53111e-10	5.59814e-09
RPIA	-0.348037	2.53445e-10	5.60141e-09
PLB1	-0.432072	2.54044e-10	5.61054e-09
NCOA4P2	1.34354	2.55203e-10	5.63202e-09
SLC9B1P4	0.700173	2.55872e-10	5.64148e-09
DNMT3B	-0.561174	2.56006e-10	5.64148e-09
ENSG00000286342	1.20172	2.56461e-10	5.64739e-09
PRDX3P2	1.18355	2.58099e-10	5.67578e-09
FLNB	-0.40388	2.58127e-10	5.67578e-09
ALDOB	-0.350935	2.58423e-10	5.67815e-09
ENSG00000231357	1.32724	2.59161e-10	5.69022e-09
VDAC2P1	1.20402	2.59484e-10	5.69317e-09
ENSG00000258202	1.00342	2.59957e-10	5.6994e-09
CDK7P1	0.515933	2.60464e-10	5.70637e-09
CACNA1S	-0.639576	2.6112e-10	5.71016e-09
MRPS17P1	1.51031	2.61183e-10	5.71016e-09
RPL21P91	1.08575	2.61205e-10	5.71016e-09
PDCD11	-0.38168	2.61979e-10	5.71469e-09
FAF2P1	1.11939	2.62016e-10	5.71469e-09
TMCC1-DT	1.09222	2.62164e-10	5.71469e-09
ENSG00000229635	0.956817	2.62169e-10	5.71469e-09
DAO	-0.517562	2.62551e-10	5.71888e-09
RTRAFP2	1.3581	2.62762e-10	5.71935e-09
IL10RA	-0.499526	2.63604e-10	5.73354e-09
AIDAP3	1.44088	2.64317e-10	5.74182e-09
PSMD12P1	0.906549	2.64366e-10	5.74182e-09
ENSG00000242477	1.07627	2.65291e-10	5.75776e-09
ZNF213-AS1	0.838367	2.66234e-10	5.77407e-09
LINC01562	1.55711	2.6794e-10	5.8069e-09
PHKBP1	1.53737	2.68277e-10	5.81004e-09
ENSG00000278830	1.11426	2.68709e-10	5.81521e-09
ENSG00000225055	0.936053	2.69907e-10	5.83637e-09
IL17RA	-0.614247	2.70073e-10	5.83637e-09
ENSG00000290450	0.840975	2.71263e-10	5.85417e-09
ENSG00000286827	1.80775	2.71317e-10	5.85417e-09
ZNF300P1	0.464681	2.71479e-10	5.85417e-09
ROR2	-0.565386	2.72423e-10	5.87032e-09
RPS20P15	1.43815	2.72738e-10	5.87291e-09
NTAN1P2	0.951996	2.73567e-10	5.88475e-09
LAPTM4BP1	0.919372	2.73678e-10	5.88475e-09
ENSG00000276960	1.00622	2.74318e-10	5.89432e-09
ENSG00000290729	1.58041	2.75131e-10	5.90759e-09
TRPV5	-0.555306	2.76207e-10	5.92646e-09
ZNF431	0.49568	2.77132e-10	5.94209e-09
LINC00458	1.50434	2.79216e-10	5.98251e-09
PAIP1P1	1.30335	2.80193e-10	5.99919e-09
RPL7P52	0.977113	2.80843e-10	6.00366e-09
BLTP2	-0.393775	2.80975e-10	6.00366e-09
RPL7P51	1.41076	2.80998e-10	6.00366e-09
AHCY	-0.742657	2.81766e-10	6.01574e-09
H3P40	1.51872	2.81963e-10	6.01574e-09
RPL5P11	0.915342	2.82671e-10	6.02658e-09
ENSG00000287045	1.57648	2.83092e-10	6.02785e-09
ATP2A1	-0.682538	2.8313e-10	6.02785e-09
PAPPA	-0.517532	2.83896e-10	6.03989e-09
RPL6P8	1.44836	2.84492e-10	6.04831e-09
TBXT	-0.456193	2.87573e-10	6.1095e-09
MIR493	-1.18997	2.87921e-10	6.1126e-09
ENSG00000279759	1.4756	2.88935e-10	6.1298e-09
TWNK	-0.586266	2.89665e-10	6.13927e-09
USP12PX	0.780858	2.89909e-10	6.13927e-09
RPL7P24	0.730438	2.9028e-10	6.13927e-09
SPRY4-AS1	1.38183	2.90383e-10	6.13927e-09
HNRNPKP4	0.500296	2.90398e-10	6.13927e-09
ENSG00000218793	2.06218	2.91587e-10	6.16008e-09
PTTG1P2	1.12217	2.93175e-10	6.1893e-09
ENSG00000271014	1.60012	2.94341e-10	6.20956e-09
PAX4	-0.763255	2.94697e-10	6.21272e-09
PLEKHA3	0.384623	2.96393e-10	6.23991e-09
C9orf78P2	1.31127	2.964e-10	6.23991e-09
RPL35AP23	1.76466	2.97216e-10	6.25273e-09
MRPL50P4	1.14905	2.98276e-10	6.27066e-09
RPL5P10	1.05769	2.98808e-10	6.27747e-09
SPTAN1	-0.377747	2.99821e-10	6.2904e-09
GLIS3	-0.296456	3.00022e-10	6.2904e-09
HNRNPA1P69	1.01182	3.00049e-10	6.2904e-09
LARP7P3	1.64367	3.004e-10	6.29339e-09
UNC13B	-0.329695	3.00706e-10	6.29542e-09
RPL39P18	1.0723	3.01224e-10	6.3019e-09
ZBTB8OSP1	1.34839	3.01733e-10	6.30816e-09
MAMLD1	-0.557372	3.03315e-10	6.33685e-09
ZNF732	0.478657	3.03761e-10	6.34176e-09
FAM177A1	0.546922	3.06033e-10	6.3848e-09
ENSG00000275956	1.1444	3.0625e-10	6.3849e-09
OLA1P1	0.638208	3.07696e-10	6.40634e-09
ISCA1P6	0.815313	3.07724e-10	6.40634e-09
BTBD10P2	0.873852	3.07915e-10	6.40634e-09
ENSG00000280323	1.61912	3.08403e-10	6.41098e-09
FAM177A1P1	1.38022	3.08564e-10	6.41098e-09
MIPOL1	0.640703	3.09089e-10	6.41748e-09
ENSG00000232176	0.944166	3.10281e-10	6.4378e-09
BLVRA	-0.36502	3.1097e-10	6.44767e-09
RPS3AP28	1.19689	3.1181e-10	6.46064e-09
CALM2P4	1.48936	3.12102e-10	6.46226e-09
ENSG00000284959	1.54935	3.1326e-10	6.47345e-09
ADAMTSL1	-0.368085	3.13575e-10	6.47345e-09
HAX1	-0.359623	3.13611e-10	6.47345e-09
AKIRIN1P2	1.22162	3.13901e-10	6.47345e-09
NSA2P6	1.12105	3.14335e-10	6.47345e-09
RPL30P4	1.18068	3.14546e-10	6.47345e-09
KIAA0586	0.475787	3.14741e-10	6.47345e-09
HNRNPA1P62	0.865674	3.1481e-10	6.47345e-09
TPT1P1	1.5469	3.14876e-10	6.47345e-09
ENSG00000224404	1.73635	3.14962e-10	6.47345e-09
EEF1A1P30	1.18811	3.15004e-10	6.47345e-09
ANKRD20A9P	0.905722	3.1812e-10	6.53109e-09
WBP11P2	0.976381	3.18241e-10	6.53109e-09
FSIP2LP	1.61837	3.18667e-10	6.53316e-09
ADAMTS2	-0.732816	3.18775e-10	6.53316e-09
ENSG00000213216	0.893913	3.19661e-10	6.54527e-09
ENSG00000253452	1.6898	3.198e-10	6.54527e-09
TMED10P2	1.00163	3.21528e-10	6.57298e-09
FHL1P1	1.02776	3.2159e-10	6.57298e-09
ENSG00000285367	1.8122	3.23698e-10	6.61158e-09
COL2A1	-0.689134	3.24745e-10	6.62849e-09
ALK	-0.519912	3.25442e-10	6.63485e-09
SLIT3	-0.562281	3.25497e-10	6.63485e-09
SNX9	0.285914	3.26153e-10	6.64375e-09
ENSG00000291131	1.12257	3.2667e-10	6.64979e-09
C8B	-0.336243	3.27061e-10	6.65325e-09
ENSG00000253273	1.29827	3.27575e-10	6.65923e-09
ENSG00000228700	1.33178	3.28528e-10	6.6741e-09
LDHAP3	0.812078	3.29642e-10	6.69222e-09
HNF1A-AS1	1.38163	3.30554e-10	6.70622e-09
ENSG00000224570	1.27007	3.32418e-10	6.7395e-09
DUS2	-0.577205	3.3377e-10	6.75988e-09
ZNF738	0.535584	3.33871e-10	6.75988e-09
RPL21P132	0.977778	3.35222e-10	6.78269e-09
ENSG00000278920	1.45327	3.35647e-10	6.78372e-09
LINC01151	0.964183	3.35732e-10	6.78372e-09
IMPA1P1	1.26351	3.35948e-10	6.78372e-09
ENSG00000286548	1.63229	3.36969e-10	6.79979e-09
PCARE	-0.550323	3.38673e-10	6.82961e-09
MRS2P2	1.06506	3.39152e-10	6.8347e-09
CLCN3P1	1.23943	3.40713e-10	6.85784e-09
ENSG00000216663	1.43648	3.40755e-10	6.85784e-09
ENSG00000293268	1.34846	3.41602e-10	6.8703e-09
RPS3AP16	0.990124	3.42633e-10	6.88644e-09
CCIN	-0.6514	3.43955e-10	6.9084e-09
ENSG00000259433	1.91097	3.44377e-10	6.91229e-09
TBATA	-0.471388	3.44782e-10	6.91581e-09
MED12	-0.487596	3.45299e-10	6.91887e-09
NCLP1	0.949422	3.45393e-10	6.91887e-09
ARHGAP31	-0.369317	3.46578e-10	6.93476e-09
U8	1.48408	3.46646e-10	6.93476e-09
TRNT1P2	1.29255	3.48604e-10	6.96931e-09
KATNBL1P3	1.82792	3.48894e-10	6.97049e-09
DDX41	-0.686279	3.50772e-10	7.00338e-09
HCG18	1.56575	3.54102e-10	7.06518e-09
FLVCR2	-0.417935	3.55973e-10	7.09782e-09
SLC5A1	-0.375793	3.60366e-10	7.18066e-09
EFL1P1	0.840145	3.63773e-10	7.24376e-09
ENSG00000235817	1.50189	3.64667e-10	7.25433e-09
CACNA1D	-0.281638	3.64784e-10	7.25433e-09
ANKRD49P3	0.85581	3.66951e-10	7.29261e-09
EPX	-0.651216	3.67605e-10	7.29866e-09
RIOK3P1	1.33359	3.67952e-10	7.29866e-09
BRAFP1	0.55239	3.683e-10	7.29866e-09
PSMC2P2	1.07442	3.6845e-10	7.29866e-09
PPP4R2P5	0.900477	3.68548e-10	7.29866e-09
BNC1	-0.429881	3.68707e-10	7.29866e-09
CYCSP27	1.19124	3.70901e-10	7.33372e-09
LINC01284	1.38641	3.70965e-10	7.33372e-09
ENSG00000278891	1.56357	3.71698e-10	7.34342e-09
ENSG00000257872	0.694409	3.72569e-10	7.3558e-09
SNORA72	1.66463	3.74609e-10	7.39125e-09
RPL21P89	1.11664	3.74927e-10	7.39268e-09
ENSG00000279159	0.990621	3.76933e-10	7.42738e-09
SRSF10P1	1.2658	3.77854e-10	7.44066e-09
OSBPL9P3	0.892687	3.78173e-10	7.44209e-09
PRDM9	-0.353172	3.78798e-10	7.44953e-09
ENSG00000231996	1.32849	3.80151e-10	7.47127e-09
GCM2	-0.42085	3.81622e-10	7.49529e-09
PDCL2P1	1.10256	3.83987e-10	7.53684e-09
GSG1L	-0.543597	3.85142e-10	7.55312e-09
CYP27B1	-0.6542	3.85317e-10	7.55312e-09
GCC2	0.609303	3.87014e-10	7.58146e-09
RTL9	-0.569495	3.87908e-10	7.59271e-09
RPS8P3	1.12293	3.88092e-10	7.59271e-09
SOCS5P4	1.11366	3.89157e-10	7.60861e-09
TAS2R31	0.502804	3.90132e-10	7.62271e-09
RPL7P45	1.35393	3.90383e-10	7.62271e-09
ATF1P1	1.05114	3.91683e-10	7.64315e-09
ENSG00000287706	1.41621	3.94387e-10	7.68278e-09
ENSG00000253886	0.827672	3.94558e-10	7.68278e-09
SURF1	-0.702729	3.94703e-10	7.68278e-09
OPTC	-0.810822	3.94869e-10	7.68278e-09
PASK	-0.526827	3.94988e-10	7.68278e-09
ENSG00000288719	1.74538	3.95794e-10	7.6935e-09
ENSG00000279924	0.808208	3.96271e-10	7.69781e-09
ENSG00000248347	1.07054	3.96838e-10	7.70387e-09
SPDYE12	-0.806178	3.97876e-10	7.71904e-09
FAM8A3P	1.24634	3.9841e-10	7.72038e-09
FYTTD1P1	1.24757	3.98456e-10	7.72038e-09
ENSG00000235726	1.10365	4.01483e-10	7.77402e-09
ENSG00000213963	1.42249	4.04094e-10	7.81957e-09
KCNQ1OT1	1.25341	4.04693e-10	7.82613e-09
DUSP12P1	1.52522	4.06674e-10	7.85941e-09
ENSG00000280011	1.34328	4.07381e-10	7.86804e-09
ENSG00000249531	1.47896	4.07748e-10	7.87009e-09
ANKRD30BP1	0.920845	4.09778e-10	7.9042e-09
DLG3	-0.465241	4.10109e-10	7.90555e-09
SAP30P1	0.835254	4.12337e-10	7.94341e-09
TM9SF4	-0.520912	4.1592e-10	8.00273e-09
MRPL35P4	1.29106	4.15946e-10	8.00273e-09
CYP4Z2P	0.482906	4.19858e-10	8.07283e-09
ENSG00000286084	1.665	4.21043e-10	8.09046e-09
ENSG00000233454	0.951093	4.21524e-10	8.0934e-09
ENSG00000254755	1.16034	4.21732e-10	8.0934e-09
CLTCL1	-0.440908	4.23478e-10	8.11865e-09
PSAT1P1	0.743708	4.23587e-10	8.11865e-09
PARP1	-0.376635	4.25433e-10	8.14517e-09
TGFB3	-0.549776	4.2551e-10	8.14517e-09
WDR70P1	0.948162	4.25951e-10	8.14845e-09
APP-DT	1.73452	4.29336e-10	8.20798e-09
ENSG00000228399	0.966983	4.2974e-10	8.21051e-09
CLCA4-AS1	1.48972	4.304e-10	8.21675e-09
EPIC1	1.36691	4.30611e-10	8.21675e-09
ENSG00000293004	0.839704	4.31038e-10	8.21897e-09
IVD	-0.515998	4.31273e-10	8.21897e-09
ACER3	0.505359	4.32439e-10	8.236e-09
ENSG00000252765	1.46058	4.32745e-10	8.23663e-09
MCPH1-AS1	1.01637	4.33996e-10	8.25514e-09
ZNF92P2	1.54385	4.34265e-10	8.25514e-09
ENSG00000267032	1.26694	4.3545e-10	8.27244e-09
SHLD2P2	0.585414	4.36106e-10	8.2797e-09
SLC25A26	0.367383	4.36575e-10	8.28339e-09
ENSG00000249495	1.43937	4.37908e-10	8.30004e-09
ENSG00000277435	0.87924	4.38003e-10	8.30004e-09
ENSG00000255511	1.13497	4.39813e-10	8.32912e-09
ENSG00000235639	1.21025	4.4249e-10	8.36893e-09
ATP6V1E1P2	1.05115	4.42528e-10	8.36893e-09
TPO	-0.412194	4.42748e-10	8.36893e-09
RPL22P22	1.87227	4.4375e-10	8.37871e-09
HNRNPA1P72	0.912454	4.43821e-10	8.37871e-09
TXNP5	1.25414	4.44435e-10	8.38167e-09
ENSG00000229110	0.999305	4.44533e-10	8.38167e-09
SEPHS1P7	1.33251	4.47685e-10	8.43583e-09
ENSG00000232736	1.13914	4.48674e-10	8.44799e-09
ENSG00000259695	1.36046	4.48891e-10	8.44799e-09
DNAJC28	0.74588	4.49702e-10	8.45798e-09
RPL7P7	0.845382	4.50167e-10	8.46146e-09
LINC01139	1.83729	4.50937e-10	8.47066e-09
ENSG00000225191	0.729628	4.5181e-10	8.47903e-09
BRD7P1	1.15791	4.51945e-10	8.47903e-09
RPL21P25	1.47837	4.57457e-10	8.57298e-09
NPM1P26	0.899259	4.57521e-10	8.57298e-09
ENSG00000242737	1.23195	4.58815e-10	8.59189e-09
AGGF1P7	1.66859	4.62049e-10	8.63934e-09
AVIL	-0.449756	4.62184e-10	8.63934e-09
MBD1	-0.546733	4.62208e-10	8.63934e-09
DNAJB6P5	1.31045	4.64024e-10	8.66666e-09
OCA2	-0.363042	4.64244e-10	8.66666e-09
HARS2	-0.377263	4.64958e-10	8.67461e-09
ABCA11P	1.13861	4.65474e-10	8.67779e-09
POT1-AS1	1.51791	4.65762e-10	8.67779e-09
PGAP4	-0.739974	4.65991e-10	8.67779e-09
BCOR	-0.332575	4.67144e-10	8.69389e-09
LINC00662	1.55665	4.67656e-10	8.69806e-09
MKS1	-0.451223	4.68267e-10	8.70405e-09
EHMT1	-0.436778	4.6914e-10	8.7149e-09
FLVCR1-DT	1.75761	4.7239e-10	8.7674e-09
LINC03059	1.35204	4.72734e-10	8.7674e-09
SLC7A3	-0.529804	4.73022e-10	8.7674e-09
ZNF141	0.447032	4.73128e-10	8.7674e-09
GGCTP2	1.25198	4.75413e-10	8.80243e-09
LINC00467	1.53239	4.75775e-10	8.80243e-09
ANKRD42-DT	0.997329	4.75894e-10	8.80243e-09
TUBA1B-AS1	1.43601	4.77216e-10	8.81658e-09
AMER1	-0.54139	4.77243e-10	8.81658e-09
BLZF2P	1.08129	4.81644e-10	8.89243e-09
ENSG00000280047	1.59471	4.82118e-10	8.89575e-09
RPL21P113	1.34014	4.84558e-10	8.93529e-09
LINC02614	1.0465	4.85042e-10	8.93875e-09
ENSG00000259304	1.69701	4.86857e-10	8.96614e-09
IL1RN	-0.43973	4.87382e-10	8.96614e-09
RPL39P6	1.14787	4.87419e-10	8.96614e-09
EIF4A2P4	0.84367	4.89176e-10	8.9908e-09
NPM1P13	1.50932	4.89731e-10	8.9908e-09
MCC	-0.463856	4.89894e-10	8.9908e-09
ENSG00000260685	1.75896	4.89952e-10	8.9908e-09
LINC01180	1.65421	4.91428e-10	9.01239e-09
AMD1	0.546473	4.92654e-10	9.0294e-09
PAPPA2	-0.435348	4.94026e-10	9.04905e-09
HINT1	0.573356	4.94339e-10	9.04929e-09
ENSG00000258619	1.35731	4.95016e-10	9.05618e-09
SPATA31F1	-0.503611	4.97538e-10	9.0968e-09
ANOS1	-0.271468	4.97918e-10	9.09687e-09
ENSG00000253361	1.49735	4.98314e-10	9.09687e-09
PGBD4P6	1.29573	4.98446e-10	9.09687e-09
ENSG00000258906	1.51916	4.99226e-10	9.10559e-09
ENSG00000273007	1.62686	5.00912e-10	9.13082e-09
BTF3P12	1.0883	5.02562e-10	9.15305e-09
SLC41A1	-0.600698	5.02738e-10	9.15305e-09
GYG1P2	1.01758	5.03707e-10	9.16182e-09
ENSG00000198277	0.714871	5.04058e-10	9.16182e-09
ENSG00000285572	1.72899	5.04131e-10	9.16182e-09
ENSG00000254629	0.898449	5.0764e-10	9.22003e-09
POLE	-0.475748	5.08474e-10	9.22738e-09
RPS20P5	1.14558	5.08656e-10	9.22738e-09
RPS26P4	1.38313	5.09378e-10	9.23492e-09
ADAMTS17	-0.564779	5.1091e-10	9.25012e-09
RELA-DT	1.52933	5.10932e-10	9.25012e-09
GOSR1	0.519764	5.11136e-10	9.25012e-09
HMGN1P1	1.33562	5.12567e-10	9.26487e-09
XPC	-0.392704	5.12834e-10	9.26487e-09
HSPE1P25	1.51269	5.12872e-10	9.26487e-09
SALL4P2	0.917522	5.13223e-10	9.26566e-09
ENSG00000227813	1.75625	5.14371e-10	9.28083e-09
C1RL-AS1	1.21218	5.15548e-10	9.29161e-09
ANKH	-0.324571	5.15931e-10	9.29161e-09
ENSG00000249262	1.30316	5.16079e-10	9.29161e-09
SCN4B	-0.536025	5.16201e-10	9.29161e-09
ENSG00000287671	1.44248	5.19239e-10	9.34072e-09
LINC00665	1.44113	5.20796e-10	9.359e-09
ENSG00000268362	1.32459	5.20875e-10	9.359e-09
NANOGP5	0.730165	5.21963e-10	9.37296e-09
ENSG00000258168	0.885913	5.23166e-10	9.38898e-09
MPPE1P1	0.902831	5.25782e-10	9.43032e-09
NIFKP6	1.28144	5.26109e-10	9.43057e-09
PRPF19	-0.536139	5.26757e-10	9.43659e-09
RPL24P9	1.1559	5.27197e-10	9.43887e-09
ENSG00000263089	1.53558	5.27733e-10	9.44285e-09
TPT1P12	1.7943	5.29437e-10	9.46381e-09
SLC2A13P1	1.46983	5.29532e-10	9.46381e-09
EEF1B2P7	0.962226	5.30013e-10	9.46644e-09
LINC01483	1.5222	5.30599e-10	9.46644e-09
ENSG00000289062	1.5248	5.3062e-10	9.46644e-09
ENSG00000236814	0.518122	5.32426e-10	9.48896e-09
ENSG00000225625	1.52505	5.32512e-10	9.48896e-09
COPB2-DT	1.51755	5.33548e-10	9.50181e-09
CDKN2B-AS1	1.28734	5.34082e-10	9.50216e-09
HMGB1P33	1.41838	5.34197e-10	9.50216e-09
LINC01684	1.77954	5.35543e-10	9.52048e-09
CLNS1AP1	0.908779	5.36215e-10	9.52231e-09
MIR4432HG	1.56315	5.36277e-10	9.52231e-09
PSMD7P1	1.00526	5.36662e-10	9.52354e-09
ENSG00000235089	1.25141	5.37435e-10	9.53166e-09
SEPTIN14P12	0.95061	5.37964e-10	9.53543e-09
ST13P20	0.883591	5.3852e-10	9.53967e-09
TRIM42	-0.582382	5.3922e-10	9.54647e-09
ENSG00000220960	0.932827	5.42198e-10	9.59356e-09
HNRNPCP9	1.12522	5.43028e-10	9.60261e-09
ENSG00000244076	1.0376	5.43546e-10	9.60615e-09
DPPA3P5	1.32624	5.44749e-10	9.62136e-09
OR5AK1P	1.14696	5.45044e-10	9.62136e-09
AGGF1P1	1.11094	5.46193e-10	9.636e-09
EEF1B2P8	1.21557	5.46754e-10	9.64025e-09
CCNYL7	1.09159	5.47549e-10	9.64528e-09
LINC01597	1.01276	5.47679e-10	9.64528e-09
ENSG00000253312	1.26927	5.50523e-10	9.6879e-09
RPS3AP18	1.25014	5.50741e-10	9.6879e-09
GDNF-AS1	1.40457	5.5111e-10	9.68874e-09
BNIP3P45	1.48836	5.51661e-10	9.69279e-09
RSL24D1P5	1.47577	5.53406e-10	9.71779e-09
MRPL30	1.41996	5.54018e-10	9.72288e-09
LINC03002	1.56857	5.5451e-10	9.72585e-09
ENSG00000243503	1.40331	5.56714e-10	9.7588e-09
KRT75	-0.60838	5.57036e-10	9.7588e-09
ENSG00000290971	1.27382	5.58609e-10	9.78069e-09
XPO1	0.624816	5.59708e-10	9.79423e-09
HMGN2P18	0.897989	5.61712e-10	9.82361e-09
ENSG00000287679	1.60751	5.62221e-10	9.82682e-09
FGF7P8	1.60131	5.63835e-10	9.84932e-09
CBR3-AS1	1.48467	5.64988e-10	9.86374e-09
ENSG00000235274	1.71248	5.6885e-10	9.92543e-09
SRP19	0.770866	5.70419e-10	9.94705e-09
IFT172	-0.320869	5.71985e-10	9.96826e-09
ENSG00000228999	1.67381	5.72296e-10	9.96826e-09
GCSHP1	1.54954	5.73046e-10	9.97556e-09
HSP90AB5P	0.997552	5.73798e-10	9.98289e-09
ENSG00000254277	1.6185	5.75076e-10	9.99936e-09
C2orf69P2	1.41952	5.77403e-10	1.0034e-08
RFPL1S	0.711679	5.7986e-10	1.00659e-08
ENSG00000279110	1.41473	5.79902e-10	1.00659e-08
ENSG00000257128	1.08342	5.80352e-10	1.00679e-08
CTDSP2	-0.63992	5.82308e-10	1.00902e-08
ARL5AP1	1.67244	5.82394e-10	1.00902e-08
ENSG00000267404	1.09042	5.82642e-10	1.00902e-08
ENSG00000248752	1.63461	5.85354e-10	1.01251e-08
KRT2	-0.546307	5.85545e-10	1.01251e-08
BLOC1S6P1	1.37013	5.85679e-10	1.01251e-08
MIR4280HG	1.53266	5.85998e-10	1.01251e-08
DPY19L1P2	0.902475	5.87524e-10	1.01456e-08
EIF1P7	1.19388	5.87941e-10	1.0147e-08
CHORDC1P5	0.86277	5.91045e-10	1.01948e-08
RPS24P18	1.35857	5.91611e-10	1.01987e-08
ENSG00000230291	0.711311	5.92621e-10	1.02103e-08
ENSG00000287262	1.60063	5.93528e-10	1.02201e-08
KCTD9P5	0.661198	5.97962e-10	1.02905e-08
ENSG00000256035	0.934569	5.98705e-10	1.02974e-08
RPAP2	0.554451	6.01809e-10	1.03431e-08
HMGB1P24	0.810563	6.02044e-10	1.03431e-08
IL6STP1	0.780911	6.03274e-10	1.03583e-08
EIF4E2P2	0.959316	6.03886e-10	1.03629e-08
CFL1P1	1.42169	6.05184e-10	1.03793e-08
UQCRC1	-0.644575	6.0564e-10	1.03812e-08
TRPC6P9	1.75107	6.10837e-10	1.04644e-08
NDUFA5P9	1.92788	6.12088e-10	1.04798e-08
LINC03048	1.45946	6.13718e-10	1.04961e-08
ENSG00000229618	1.3728	6.13734e-10	1.04961e-08
ENSG00000273851	1.082	6.14378e-10	1.05012e-08
LINC01608	1.64059	6.14739e-10	1.05014e-08
LDLR	-0.557912	6.16822e-10	1.0531e-08
SEMA7A	-0.715267	6.183e-10	1.0549e-08
EXTL2P1	1.16485	6.18574e-10	1.0549e-08
ENSG00000228181	1.10141	6.19089e-10	1.05518e-08
CCDC144NL-AS1	1.10019	6.19892e-10	1.05595e-08
SYNGAP1	-0.624869	6.20867e-10	1.05702e-08
ZNF780A	0.51223	6.21437e-10	1.05739e-08
ENSG00000226810	0.613866	6.22646e-10	1.05885e-08
PDCL3P6	0.727223	6.23195e-10	1.05919e-08
RPL7P31	1.43791	6.30639e-10	1.07123e-08
XIAPP2	1.38088	6.31238e-10	1.07165e-08
HMGB1P18	1.42844	6.32531e-10	1.07324e-08
FRG1-DT	1.6131	6.34203e-10	1.07547e-08
PICK1	-0.690727	6.36571e-10	1.07888e-08
NCF4	-0.665369	6.36998e-10	1.07893e-08
LINC02202	1.97244	6.37619e-10	1.07893e-08
NPC1L1	-0.711831	6.3788e-10	1.07893e-08
LRRC2P1	0.957367	6.38033e-10	1.07893e-08
KLC1-AS1	1.85484	6.38494e-10	1.07911e-08
ENSG00000205695	1.26903	6.39457e-10	1.08013e-08
BRD8	-0.253624	6.40771e-10	1.08153e-08
PTGES3P5	1.78996	6.41005e-10	1.08153e-08
ENSG00000267199	1.54619	6.42036e-10	1.08234e-08
ODCP	1.33932	6.42394e-10	1.08234e-08
CARMN	1.22267	6.42561e-10	1.08234e-08
COLEC11	-0.430613	6.44513e-10	1.08503e-08
BCDIN3D-AS1	1.44557	6.45099e-10	1.08535e-08
RPL7AP14	1.00642	6.46046e-10	1.08535e-08
ZNF285CP	0.723423	6.46187e-10	1.08535e-08
ENSG00000227854	0.932264	6.46475e-10	1.08535e-08
ENSG00000256070	0.9978	6.46657e-10	1.08535e-08
PER2	-0.350743	6.46864e-10	1.08535e-08
NDUFAF4P2	0.847043	6.48908e-10	1.08817e-08
RPL34P31	0.86749	6.49607e-10	1.08832e-08
UBE3AP2	0.762747	6.49718e-10	1.08832e-08
LINC02055	1.40955	6.51043e-10	1.08994e-08
LYSMD1	-0.527679	6.51663e-10	1.09003e-08
ENSG00000253154	2.06003	6.51824e-10	1.09003e-08
NDUFAF4P4	1.0839	6.52202e-10	1.09006e-08
GOT2P6	1.07852	6.53826e-10	1.09217e-08
GNAS-AS1	1.73981	6.54268e-10	1.09222e-08
CTNNA1P1	0.648193	6.54579e-10	1.09222e-08
NUS1P4	0.862632	6.56014e-10	1.09381e-08
GRAMD1B	-0.403911	6.56333e-10	1.09381e-08
FAM8A6P	1.12475	6.56621e-10	1.09381e-08
PCBP3	-0.488333	6.57362e-10	1.09444e-08
FAM8A2P	1.11476	6.58957e-10	1.09624e-08
HSPA8P18	1.10441	6.59169e-10	1.09624e-08
TFAMP2	1.24948	6.64328e-10	1.10391e-08
EEF1A1P44	1.26661	6.64513e-10	1.10391e-08
HMGB3P13	1.23761	6.6504e-10	1.10418e-08
NPM1P5	0.930699	6.68856e-10	1.1099e-08
RBBP4P1	0.544947	6.70492e-10	1.11143e-08
ENSG00000261144	1.29185	6.70515e-10	1.11143e-08
MIR130AHG	1.42197	6.71321e-10	1.11216e-08
RPL7P60	1.04649	6.72069e-10	1.11279e-08
ENSG00000237251	1.04752	6.73102e-10	1.11389e-08
CHRNA1	-0.370254	6.74464e-10	1.11553e-08
RPL17P41	0.930394	6.77197e-10	1.11943e-08
HNRNPA1P38	0.800934	6.7987e-10	1.12324e-08
ENSG00000219757	1.38393	6.84398e-10	1.1301e-08
ENSG00000253642	1.47023	6.86124e-10	1.13233e-08
MLC1	-0.526125	6.8811e-10	1.13437e-08
C1orf50	1.34385	6.88111e-10	1.13437e-08
NLRP12	-0.547729	6.89542e-10	1.13611e-08
NF2	-0.313075	6.89946e-10	1.13615e-08
PLA2G6	-0.611557	6.91738e-10	1.13848e-08
OR4D2	-0.616264	6.92354e-10	1.13887e-08
HAUS4P1	1.03849	6.95877e-10	1.14404e-08
CSPP1	0.481683	6.97895e-10	1.14674e-08
UBE2V1P1	0.771876	6.98311e-10	1.1468e-08
CEP63	0.451778	7.00501e-10	1.14977e-08
ENSG00000289287	1.6186	7.00886e-10	1.14977e-08
LINC01877	1.42487	7.01898e-10	1.15081e-08
ENSG00000255086	2.07874	7.02756e-10	1.15159e-08
SKP1	0.600643	7.05729e-10	1.15583e-08
RPL21P111	0.962809	7.09628e-10	1.16131e-08
ENSG00000251501	1.22193	7.10082e-10	1.16131e-08
EDAR	-0.655289	7.1023e-10	1.16131e-08
RPS7P6	1.40398	7.11178e-10	1.16223e-08
NPM1	0.458086	7.15451e-10	1.16858e-08
GSTA11P	0.705013	7.1778e-10	1.17175e-08
MAPRE1P2	0.927893	7.22301e-10	1.1785e-08
RPS4XP15	1.56341	7.22852e-10	1.17876e-08
ENSG00000215805	1.09754	7.23994e-10	1.17998e-08
EIF3J	0.610799	7.24835e-10	1.18023e-08
GYG1P1	0.733936	7.24926e-10	1.18023e-08
CYP4F22	-0.677052	7.25726e-10	1.18089e-08
LAMB2	-0.786664	7.30477e-10	1.18798e-08
ENSG00000223628	1.32266	7.33076e-10	1.19156e-08
CLN5	0.736836	7.3652e-10	1.19609e-08
RPL7L1P3	0.936592	7.36653e-10	1.19609e-08
IPO8P1	0.841398	7.38395e-10	1.19827e-08
EEF1A1P17	0.939148	7.39079e-10	1.19874e-08
NEAT1	1.19716	7.43313e-10	1.20496e-08
ENSG00000286450	1.58901	7.44105e-10	1.20559e-08
ENSG00000266048	1.4776	7.45063e-10	1.2065e-08
RPL7L1P5	0.90202	7.46133e-10	1.20758e-08
EEF1B2P4	1.09013	7.47657e-10	1.2088e-08
DNAJB6P6	1.26083	7.47684e-10	1.2088e-08
ENSG00000274080	1.68809	7.49449e-10	1.211e-08
C2orf74-DT	1.62335	7.50246e-10	1.21164e-08
ENSG00000291038	1.37598	7.51357e-10	1.21278e-08
CDHR1	-0.621071	7.55796e-10	1.2193e-08
LINC02840	1.31692	7.56888e-10	1.22003e-08
RPS3AP44	0.918547	7.57192e-10	1.22003e-08
MAPK6P5	0.92266	7.57463e-10	1.22003e-08
ENSG00000291015	1.27611	7.58249e-10	1.22064e-08
ENSG00000241255	1.03852	7.61198e-10	1.2242e-08
ENSG00000274979	1.68341	7.6127e-10	1.2242e-08
ENSG00000231741	1.3111	7.63131e-10	1.22654e-08
ZNF321P	1.31828	7.67845e-10	1.23308e-08
APOOP5	0.577633	7.68019e-10	1.23308e-08
SLC6A3	-0.750786	7.71222e-10	1.23757e-08
LINC02018	1.45583	7.76407e-10	1.24522e-08
RPL7L1P13	1.03991	7.77145e-10	1.24574e-08
EIF3E	0.587982	7.79983e-10	1.24856e-08
DPY19L1P1	0.912225	7.80333e-10	1.24856e-08
THRAP3P3	0.969243	7.80439e-10	1.24856e-08
ENSG00000197550	1.69387	7.80558e-10	1.24856e-08
ENSG00000224334	0.733177	7.83375e-10	1.2513e-08
ABCC11	-0.479348	7.83399e-10	1.2513e-08
TINF2	-0.513004	7.83513e-10	1.2513e-08
OR9A1P	1.23331	7.89466e-10	1.26014e-08
SLC12A2-DT	1.47195	7.90331e-10	1.26085e-08
RANP8	1.19907	7.91508e-10	1.26206e-08
CRYZL2P	1.55902	7.93393e-10	1.2644e-08
FANCD2P2	0.472004	7.95053e-10	1.26638e-08
OR7E62P	0.783383	8.04911e-10	1.28077e-08
ENSG00000270870	0.973338	8.04942e-10	1.28077e-08
RPL26P35	1.23056	8.05732e-10	1.28136e-08
KCTD21-AS1	1.55827	8.06604e-10	1.28207e-08
GATA1	-0.68264	8.07602e-10	1.28298e-08
LINC01234	1.41569	8.08084e-10	1.28307e-08
SLC9B1P2	0.809218	8.09481e-10	1.28461e-08
RYR1	-0.647253	8.14763e-10	1.29231e-08
CPEB1-AS1	1.66476	8.16885e-10	1.29477e-08
PSMA6P4	0.93184	8.17169e-10	1.29477e-08
SEPTIN7P7	0.689241	8.17961e-10	1.29534e-08
PEX12P1	0.730935	8.22859e-10	1.30241e-08
ENSG00000262370	1.02729	8.23701e-10	1.30306e-08
TGM5	-0.565724	8.25837e-10	1.30532e-08
NBEAP2	1.34514	8.26205e-10	1.30532e-08
ENSG00000268205	1.66335	8.26426e-10	1.30532e-08
ENSG00000213252	0.537131	8.28882e-10	1.30851e-08
HSPA8P8	1.09398	8.2991e-10	1.30945e-08
VIL1	-0.571183	8.31886e-10	1.31188e-08
ZNF680	0.570484	8.33232e-10	1.31332e-08
ENSG00000274167	1.10184	8.34599e-10	1.31479e-08
ENSG00000290536	1.01995	8.39763e-10	1.32223e-08
ZNF692	-0.637838	8.4154e-10	1.32417e-08
HSPD1P4	0.58212	8.41871e-10	1.32417e-08
USP13	0.903581	8.4466e-10	1.32786e-08
VPS45	0.330335	8.45261e-10	1.32812e-08
ENSG00000233862	1.72358	8.46642e-10	1.32913e-08
BCLAF1P1	0.48329	8.46855e-10	1.32913e-08
APOA4	-0.787957	8.4723e-10	1.32913e-08
ENSG00000240687	1.48201	8.48078e-10	1.32977e-08
PDE8B	-0.231781	8.52827e-10	1.33652e-08
ENSG00000280334	1.48906	8.54784e-10	1.3389e-08
SLC25A14P1	0.871007	8.55478e-10	1.33929e-08
TM2D1	0.712767	8.5932e-10	1.3446e-08
ZNF72BP	0.902145	8.62097e-10	1.34825e-08
SPATA31C1	-0.53797	8.67207e-10	1.35554e-08
ENSG00000240808	0.973869	8.69231e-10	1.358e-08
LINC01322	1.29444	8.70054e-10	1.35858e-08
MRPS18CP4	1.56144	8.70807e-10	1.35905e-08
ENSG00000204684	1.71747	8.73386e-10	1.36237e-08
MTHFD2P7	0.811372	8.82023e-10	1.37514e-08
TAS1R2	-0.823187	8.83913e-10	1.37737e-08
SLC6A2	-0.582818	8.849e-10	1.3782e-08
BDNF-AS	1.46691	8.85563e-10	1.37852e-08
RPL7P28	0.750935	8.87412e-10	1.38068e-08
ENSG00000217612	0.819439	8.88945e-10	1.38172e-08
ENSG00000260109	1.35592	8.88996e-10	1.38172e-08
KRR1	0.606488	8.89952e-10	1.38203e-08
RPL7P35	1.3305	8.90376e-10	1.38203e-08
TGFBR2	-0.332084	8.90568e-10	1.38203e-08
RPL21P80	0.61559	8.93137e-10	1.3853e-08
POLR3A	-0.25048	8.93697e-10	1.38546e-08
CA4	-0.737387	8.97481e-10	1.39061e-08
LINC00504	1.54117	9.0355e-10	1.3993e-08
POMT2	-0.364085	9.04623e-10	1.40024e-08
ENSG00000254519	1.46956	9.0877e-10	1.40594e-08
NMD3P2	0.731768	9.11501e-10	1.40944e-08
SETSIP	0.564638	9.15437e-10	1.4148e-08
ENSG00000215263	1.05617	9.16068e-10	1.41505e-08
C10orf143	1.4743	9.17025e-10	1.4158e-08
ENSG00000223539	1.26972	9.18681e-10	1.4174e-08
TIMM9P2	1.69298	9.19001e-10	1.4174e-08
PLEKHM1	-0.535062	9.2065e-10	1.41874e-08
ENSG00000279555	1.91456	9.20854e-10	1.41874e-08
LZIC	0.450893	9.21281e-10	1.41874e-08
DNAH2	-0.490797	9.23767e-10	1.42185e-08
ARFGEF3	-0.348291	9.26795e-10	1.42578e-08
ABAT	-0.390629	9.279e-10	1.42675e-08
GAPDHP33	1.1036	9.30783e-10	1.43046e-08
SUCLA2P1	0.603075	9.3224e-10	1.43171e-08
ZNF33BP1	1.40078	9.32654e-10	1.43171e-08
HMGB1P14	1.11855	9.33025e-10	1.43171e-08
HLCS	-0.301963	9.35771e-10	1.43478e-08
PPIAP62	0.828141	9.35973e-10	1.43478e-08
RPL21P83	0.843719	9.38574e-10	1.43803e-08
MCUR1	0.422253	9.39571e-10	1.43883e-08
ZNF677	0.469884	9.40857e-10	1.43969e-08
CYYR1-AS1	1.32153	9.41087e-10	1.43969e-08
CCT5P1	0.628392	9.4223e-10	1.44071e-08
ZNF519	0.538218	9.44531e-10	1.4435e-08
ENSG00000250461	0.959426	9.45575e-10	1.44436e-08
TMEM154	0.383309	9.47591e-10	1.44621e-08
SLC7A7	-0.386657	9.47744e-10	1.44621e-08
ENSG00000253553	1.47973	9.50541e-10	1.44974e-08
PELO-AS1	1.54055	9.51445e-10	1.45028e-08
RPL7P14	0.902052	9.52214e-10	1.45028e-08
ABCC5	-0.302736	9.52672e-10	1.45028e-08
ENSG00000236395	1.67705	9.52931e-10	1.45028e-08
DNAH9	-0.347599	9.53299e-10	1.45028e-08
ANKRD6	-0.410329	9.54353e-10	1.45054e-08
SLC25A38	-0.362338	9.54528e-10	1.45054e-08
MAPK6	0.449126	9.54908e-10	1.45054e-08
DISC1FP1	1.67279	9.58599e-10	1.45541e-08
DHFRP3	0.93656	9.60603e-10	1.45772e-08
MTERF1	0.578631	9.62009e-10	1.45912e-08
ENSG00000269274	0.760943	9.64161e-10	1.46156e-08
ENSG00000265417	0.883898	9.64586e-10	1.46156e-08
CCNYL6	0.991745	9.66084e-10	1.46238e-08
WARS2-IT1	1.63317	9.66098e-10	1.46238e-08
SETP20	0.97167	9.68842e-10	1.4658e-08
SNF8P1	0.912531	9.69556e-10	1.46614e-08
EEDP1	1.02583	9.73492e-10	1.47136e-08
STIM1	-0.452065	9.74057e-10	1.47148e-08
APOOP1	1.32123	9.76273e-10	1.47366e-08
[truncated: 22,338 more rows]
